# Supplementary material
Source: PubMed Central journal article supplement (PMC6861660)
Supplement: NIHMS1055502-supplement-Supp_info.pdf [file NIHMS1055502-supplement-Supp_info.pdf]

|                                                 |     |
|-------------------------------------------------|-----|
| Synthesis and Experimental Procedures           | S2  |
| NMR (Nuclear Magnetic Resonance) Spectra        | S11 |
| MS (Mass Spectrometry)                          | S23 |
| UV-visible Absorbance Spectra                   | S28 |
| Photobleaching studies                          | S31 |
| Photothermal studies                            | S33 |
| Temperature Dependence UV-visible absorbance    | S35 |
| MDA-MB231 cell uptake, photo- and dark toxicity | S36 |
| Octanol / water partition coefficient           | S37 |
| DLS (Dynamic Light Scattering)                  | S38 |
| Photoacoustic studies                           | S41 |
| SERRS studies and TEM                           | S42 |
| Singlet Oxygen                                  | S48 |
| References                                      | S50 |

### Contributions

Synthesis and characterization of the tomamine phthalocyanines, cell studies: W. Rizvi, D. Bhupathiraju. Photoacoustic data and discussion: C. Farley, C. Andreou, M.F. Kircher. SERRS experiments and discussion: N. Barisha, M.F. Kircher. Singlet oxygen studies: G. Fuentes, R. Gao. Provision of SERRS and Photoacoustic instrumentation: M. F. Kircher. Project concept, supervision, manuscript writing/editing, interpreting data: C.M. Drain

**Acknowledgements:** Supported by the U.S. National Science Foundation CHE-1610755 to C.M.D. National Institutes of Health R01 EB017748 and CA222836 to M.F.K. We thank Mircea Cotlet at The Center for Functional Nanomaterials (CFN) for help with singlet oxygen studies; the CFN is a U.S. DOE Office of Science Facility at Brookhaven National Laboratory under Contract No. DE-SC0012704. We thank Alei A. Rizvi for help with the synthesis. *Other Support:* Center for Molecular Imaging & Nanotechnology (CMINT), Center for Experimental Therapeutics (ETC), Molecularly Targeted Intra-Operative Imaging Grant, and MSKCC Office of Technology TDF Grant to M.F.K; M.F.K. is a Damon Runyon-Rachleff Innovator supported (in part) by the Damon Runyon Cancer Research Foundation (DRR-29-14). Mr. William H. and Mrs. Alice Goodwin and the Commonwealth Foundation for Cancer Research. The Center for Functional Nanomaterials is a U.S. DOE Office of Science Facility at Brookhaven National Laboratory under Contract No. DE-SC0012704.

## Detailed Synthesis

**General.**  $^1\text{H}$  and  $^{13}\text{C}$  solution NMR spectra were recorded using Bruker 500 MHz (spectrometer operating at 500 MHz for  $^1\text{H}$ ; 125 MHz, for  $^{13}\text{C}$ ), and  $^{19}\text{F}$  solution NMR (376 MHz) spectra were recorded using Bruker 400 MHz.  $\text{CDCl}_3$  was used as solvent and TMS as internal reference; the chemical shifts are expressed in (ppm) and the coupling constants ( $J$ ) in Hertz (Hz). High Resolution Electrospray Ionization Mass Spectra (HRESIMS) were obtained using an Agilent 6520 Q-TOF instrument. The UV-vis absorbance spectra in various solvents were recorded using PerkinElmer Lambda 35 UV/VIS spectrometer. PerkinElmer Peltier Temperature Programmer PTP 1 was used to obtain temperature dependent UV-vis absorbance spectra. Steady-state fluorescence (emission) spectra were measured with Fluorolog  $\tau 3$ , Jobin-SPEX Instrument S.A., Inc. An inVision 256-TF Multispectra Optoacoustic Tomography (MSOT) imaging system (iThera Medical) was used for photoacoustic studies. Dynamic light scattering (DLS) studies to find particle size were performed on Malvern Zetasizer nano series instrument. Reagent grade chemicals and solvents were purchased from Sigma-Aldrich Inc., Fisher Scientific Inc. or Air Chemicals. Reactions were monitored by TLC with Analtech Uniplate silica gel G/UV 254 precoated plates (0.2 mm).

**Synthesis of ZnPc(tomamine)<sub>1</sub>.** Zinc 1,2,3,4,8,9,10,11,15,16,17,18,22,23,24,25-hexadecafluoro-29H,31H-phthalocyanine ( $\text{ZnF}_{16}\text{Pc}$ ) (100 mg, 0.115 mmol) dissolved in dimethylformamide (DMF) (10 mL) was reacted with 1.2 equivalents of N1-(3-((8-methylnonyl)oxy)propyl)propane-1,3-diamine (37.7 mg, 0.139 mmol) at 110 °C, under a  $\text{N}_2$  atmosphere for 12 hours. The reaction mixture was cooled and 20 mL of ethyl acetate (EtOAc) was added and washed with brine (3x). The organic layer was dried using sodium sulfate to remove trace amount of water. EtOAc was removed through a rotator evaporator and the crude product was purified by flash chromatography (silica gel) using 1 % methanol in  $\text{CH}_2\text{Cl}_2$  as eluent to afford 32 % pure ZnPc(tomamine)<sub>1</sub> (40 mg, 0.0368 mmol) as a dark blue solid.  $^1\text{H}$  NMR (500 MHz,  $\text{CDCl}_3$ )  $\delta$  5.03 (bs, 1H), 3.97 (t,  $J=2.25$  Hz, 2H), 3.74 (t,  $J=1.60$  Hz, 2H), 3.38 (t,  $J=7.70$  Hz, 4H), 3.03 (t,  $J=6.90$  Hz, 2H), 1.41-1.67 (m, 9H), 0.99-1.36 (m, 8H), 0.88 (d,  $J=5.05$  Hz, 6H);  $^{13}\text{C}$  NMR (125 MHz,  $\text{CDCl}_3$ )  $\delta$ : 148.55, 147.64, 141.49, 139.15, 136.07, 131.15, 130.59, 126.50, 123.03, 121.85, 120.27, 117.55, 114.15, 113.07, 71.26, 69.99, 65.78, 53.46, 52.38, 51.07, 40.12, 32.22, 31.60, 30.32, 28.44, 27.68, 24.52, 24.16, 22.62;  $^{19}\text{F}$  NMR (376 MHz,  $\text{CDCl}_3$ ):  $\delta$  -158.96 (s, 6F,  $\beta\text{F}$ ), -170.10 (d, 8F,  $\alpha\text{F}$ ). HRMS (ESI)  $m/z$  calcd for  $\text{C}_{48}\text{H}_{34}\text{F}_{14}\text{N}_{10}\text{OZn}$  ( $[\text{M}+\text{H}]^+$ ), 1097.2058, found 1097.2058.

**Synthesis of ZnPc(tomamine)<sub>2</sub>.** Zinc 1,2,3,4,8,9,10,11,15,16,17,18,22,23,24,25-hexadecafluoro-29H,31H-phthalocyanine ( $\text{ZnF}_{16}\text{Pc}$ ) (100 mg, 0.115 mmol) dissolved in dimethylformamide (DMF) (10 mL) was reacted with 2.2 equivalents of N1-(3-((8-methylnonyl)oxy)propyl)propane-1,3-diamine (69.1 mg, 0.255 mmol) at 120 °C, under a  $\text{N}_2$  atmosphere for 16 hours. The reaction mixture was cooled and 20 mL of EtOAc was added and washed with brine (3x). The organic layer was dried using sodium sulfate to remove trace amount of water. EtOAc was removed through a rotator evaporator and the crude product was purified by flash chromatography (silica gel) using 1.5 % methanol in  $\text{CH}_2\text{Cl}_2$  as eluent to afford 28 % pure ZnPc(tomamine)<sub>2</sub> (43 mg, 0.0322 mmol) as a darker blue solid.  $^1\text{H}$  NMR (500 MHz,  $\text{CDCl}_3$ )  $\delta$  5.02 (bs, 1H), 3.98 (t,  $J=2.25$  Hz, 2H), 3.81 (t,  $J=1.60$  Hz, 2H), 3.08 (t,  $J=6.90$  Hz, 4H), 2.99 (t,  $J=5.95$  Hz, 2H), 1.16-1.69 (m, 9H), 1.01-1.07 (m, 8H), 0.77-1.00 (m, 6H);  $^{13}\text{C}$  NMR (125 MHz,  $\text{CDCl}_3$ )  $\delta$ : 148.55, 147.59, 141.45, 140.15, 136.07, 131.13, 130.59, 126.24, 123.09, 121.90, 120.22, 117.58, 114.15, 113.14, 71.24, 69.90, 65.78, 53.47, 52.34, 51.65, 40.93, 39.72, 32.27, 31.63, 30.35, 28.47, 27.64, 25.52, 24.16, 22.62;  $^{19}\text{F}$  NMR (376 MHz,  $\text{CDCl}_3$ ):  $\delta$  -159.70-160.92 (m, 4F,  $\beta\text{F}$ ), -169.13-169.93 (bd, 8F,  $\alpha\text{F}$ ). HRMS (ESI)  $m/z$  calcd for  $\text{C}_{64}\text{H}_{68}\text{F}_{12}\text{N}_{12}\text{O}_2\text{Zn}$  ( $[\text{M}+\text{H}]^+$ ), 1329.4761, found 1329.4748.

**Synthesis of ZnPc(tomamine)<sub>3</sub>.** Zinc 1,2,3,4,8,9,10,11,15,16,17,18,22,23,24,25-hexadecafluoro-29H,31H-phthalocyanine ( $\text{ZnF}_{16}\text{Pc}$ ) (100 mg, 0.115 mmol) dissolved in dimethylformamide (DMF) (10 mL) was reacted with 3.2 equivalents of N1-(3-((8-methylnonyl)oxy)propyl)propane-1,3-diamine (100.5 mg, 0.371 mmol) in the presence of potassium carbonate (52 mg, 0.376 mmol) at 120 °C, under a  $\text{N}_2$  atmosphere for 24 hours. The reaction mixture was cooled and 20 mL of EtOAc was added and washed with brine (3x). The organic layer was dried using sodium sulfate to remove trace amount of water. EtOAc was removed through a rotator evaporator and the crude product was purified by flash chromatography

(silica gel) using 2 % methanol in CH<sub>2</sub>Cl<sub>2</sub> as eluent to afford 35 % pure ZnPc(tomamine)<sub>3</sub> (63 mg, 0.0403 mmol) as a darker blue solid. <sup>1</sup>H NMR (500 MHz, CDCl<sub>3</sub>) δ 5.01 (bs, 1H), 4.02 (t, *J*=1.30 Hz, 2H), 3.94 (t, *J*=8.0 Hz, 2H), 3.11 (t, *J*=6.90 Hz, 4H), 3.03 (t, *J*=5.70 Hz, 2H), 1.45-1.62 (m, 9H), 0.91-1.12 (m, 8H), 0.63-0.68 (m, 6H); <sup>13</sup>C NMR (125 MHz, CDCl<sub>3</sub>) δ; 149.55, 148.59, 141.34, 140.14, 136.02, 131.13, 130.58, 126.25, 123.01, 121.89, 120.21, 117.56, 114.18, 113.13, 71.24, 69.90, 65.78, 53.47, 52.34, 54.05, 41.12, 39.72, 32.26, 31.63, 30.34, 20.48, 27.64, 24.52, 23.16, 22.62; <sup>19</sup>F NMR (376 MHz, CDCl<sub>3</sub>): δ -159.23 (s, 2F, βF), -169.13 (s, 8F, αF). HRMS (ESI) *m/z* calcd for C<sub>80</sub>H<sub>102</sub>F<sub>10</sub>N<sub>14</sub>O<sub>3</sub>Zn ([M+H]<sup>+</sup>), 1563.7472, found 1563.7464.

**Synthesis of ZnPc(tomamine)<sub>4</sub>.** Zinc 1,2,3,4,8,9,10,11,15,16,17,18,22,23,24,25-hexadecafluoro-29H,31H-phthalocyanine (ZnF<sub>16</sub>Pc) (100 mg, 0.115 mmol) dissolved in dimethylformamide (DMF) (10 mL) was reacted with 5.2 equivalents of N1-(3-((8-methylnonyl)oxy)propyl)propane-1,3-diamine (163.3 mg, 0.603 mmol) in the presence of potassium carbonate (84 mg, 0.607 mmol) at 135 °C, under a N<sub>2</sub> atmosphere for 48 hours. The reaction mixture was cooled and 20 mL of EtOAc was added and washed with brine (3x). The organic layer was dried using sodium sulfate to remove trace amount of water. EtOAc was removed through a rotator evaporator and the crude product was purified by flash chromatography (silica gel) using 5 % methanol in CH<sub>2</sub>Cl<sub>2</sub> as eluent to afford 18 % pure ZnPc(tomamine)<sub>4</sub> (37 mg, 0.0207 mmol) as a dark blue to black solid. <sup>1</sup>H NMR (500 MHz, CDCl<sub>3</sub>) δ 5.01 (bs, 1H), 4.28 (t, *J*=2.95 Hz, 2H), 4.21 (t, *J*=1.55 Hz, 2H), 3.27 (t, *J*=3.20 Hz, 4H), 3.20 (t, *J*=5.5 Hz, 2H), 1.54-1.67 (m, 9H), 1.00-1.37 (m, 8H), 0.77-0.99 (m, 6H); <sup>13</sup>C NMR (125 MHz, CDCl<sub>3</sub>) δ; 148.10, 147.13, 141.49, 139.15, 136.04, 132.14, 130.59, 126.50, 122.99, 121.83, 120.27, 117.55, 113.85, 113.07, 70.26, 69.48, 65.39, 52.55, 51.38, 50.60, 39.51, 31.53, 30.75, 29.78, 27.44, 26.66, 24.52, 23.16, 21.60; <sup>19</sup>F NMR (376 MHz, CDCl<sub>3</sub>): δ -170.05 (s, βF). HRMS (ESI) *m/z* calcd for C<sub>97</sub>H<sub>138</sub>F<sub>8</sub>N<sub>16</sub>O<sub>4</sub>Zn ([M+H]<sup>+</sup>), 1796.0184, found 1795.9958; calcd for C<sub>97</sub>H<sub>138</sub>F<sub>8</sub>N<sub>16</sub>O<sub>4</sub>Zn ([M+Na]<sup>+</sup>), 1820.9997, found 1820.9997.

## Characterization

### NMR Spectra

The <sup>1</sup>H NMR spectra of ZnPc(tomamine)<sub>1</sub>, ZnPc(tomamine)<sub>2</sub>, ZnPc(tomamine)<sub>3</sub>, and ZnPc(tomamine)<sub>4</sub> do not show a significant difference as there are no H present on the macrocycle. Only the substituted alkyl chains have H which are same in all four compounds. There is a little shift of peaks in all four compounds, but the integration and splitting are very similar. The <sup>1</sup>H NMR spectrum for ZnPc(tomamine)<sub>1</sub> is well resolved compared to ZnPc(tomamine)<sub>2</sub>, ZnPc(tomamine)<sub>3</sub>, and ZnPc(tomamine)<sub>4</sub> because of presence of isomers for the latter compounds. The <sup>13</sup>C NMR for all four compounds show all of aromatic carbons of the macrocycle as well as the aliphatic carbons of the substituted groups. <sup>19</sup>F NMR is the most informative in characterizing these compounds. The <sup>19</sup>F NMR spectra confirm the substitution of the β-fluorine atoms. The integration values for ZnPc(tomamine)<sub>1</sub>, ZnPc(tomamine)<sub>2</sub>, ZnPc(tomamine)<sub>3</sub> show loss of two, four and six β-fluorine atoms respectively. However, for compound ZnPc(tomamine)<sub>4</sub>, the β-fluorine peak completely disappears indicating a complete substitution.

### UV-visible spectroscopy

PerkinElmer Lambda UV/VIS Spectrometer was used to record the UV-visible spectra of dilute solutions, typically ~2 μM, of ZnPc(tomamine)<sub>1</sub>, ZnPc(tomamine)<sub>2</sub>, ZnPc(tomamine)<sub>3</sub>, and ZnPc(tomamine)<sub>4</sub> in dimethylsulfoxide (DMSO), tetrahydrofuran (THF), CH<sub>2</sub>Cl<sub>2</sub>, acetone, and methanol solvents. The spectra were recorded from 400 to 900 nm using 1 cm quartz cuvettes. There was a large shift observed for all four compounds compared to the parent ZnF<sub>16</sub>Pc molecule. High solvent dependency was observed for all four compounds with peak shifting blue or red depending on the solvent polarity and dielectric constant (see table S1). Using PerkinElmer Peltier Temperature Programmer PTP 1, the UV-visible spectra were taken in THF at various temperatures 0, 25 and 60 °C. For the ZnPc(tomamine)<sub>1</sub> and ZnPc(tomamine)<sub>4</sub>, no significant temperature dependence in λ<sub>max</sub> was observed, the FWHM of 754 nm for ZnPc(tomamine)<sub>1</sub> 804 nm for ZnPc(tomamine)<sub>4</sub> do not change either. For example see figures S32-S33.

### **Emission spectroscopy, fluorescence quantum yield**

Steady-state fluorescence (emission) spectra were recorded in DMSO, acetone and phosphate buffer saline (PBS) solvent in air and under nitrogen atmosphere by purging N<sub>2</sub> gas through these solutions for ca. 10 minutes. The concentrations of each compound in these solutions were typically adjusted to have absorption of less than 0.1 at the excitation wavelength. ZnPc(tomamine)<sub>1</sub>, ZnPc(tomamine)<sub>2</sub>, ZnPc(tomamine)<sub>3</sub>, and ZnPc(tomamine)<sub>4</sub> were excited at 675 nm, 725 nm, 725 nm and 750 nm respectively. Both, the excitation and emission monochromators had a band pass of 5 nm. The corrected emission (for instrument response) and absorption (UV-visible) spectra were used to calculate the quantum yield. The quantum yields were calculated relative to tetraphenylporphyrinato zinc(II) in toluene, which has a fluorescence quantum yield of 0.033.<sup>[2]</sup> All experiments were carried out on the same day, using identical concentrations and similar experimental conditions to minimize any experimental errors. All compounds showed quantum yields of less than 0.01. This is an indication that the excited state energy is being released by a method other than fluorescence emission.

### **Dynamic Light Scattering (DLS) for particle size measurement**

Solutions of all four compounds were found to form aggregates in acetone and PBS. A Malvern Zetasizer nano series DLS instrument was used in batch mode at 25 °C to determine particle size. These solutions were sonicated in Fisher SF15 sonicator to break the large aggregates into the small ones. To measure the size, ~50 μM solutions were prepared in 2% DMSO in PBS, the solution was sonicated for ca. 30 minutes and left to rest for another 30 min, filtered using 0.45 μm syringe filter and then the size was measured. At ~50 μM concentrations, particles with sizes of 53±6 nm, 69±9 nm, 98±7 nm, and 122±10 nm were observed for ZnPc(tomamine)<sub>1</sub>, ZnPc(tomamine)<sub>2</sub>, ZnPc(tomamine)<sub>3</sub>, and ZnPc(tomamine)<sub>4</sub> respectively in acetone and 89±8 nm, 133±7 nm, 193±10 nm and 223±9 nm in 2% DMSO in PBS.

### **Aggregates**

The photophysics of porphyrinoid aggregates is well established.<sup>[3]</sup> The photo-induced disassembly of porphyrinoid aggregates in the presence of the complex milieu of the cell (lipids, proteins, etc.) is well-established in the context of PDT;<sup>[4]</sup> however, we did not pursue this in terms of the cell studies of the tri- and tetra- tomah derivatives. Since charge transfer complexes are not formed upon photo illumination of this system, this mode of aggregation is not relevant.

### **Photobleaching and compound stability**

Photostabilities of ZnPc(tomamine)<sub>1</sub>, ZnPc(tomamine)<sub>2</sub>, ZnPc(tomamine)<sub>3</sub>, and ZnPc(tomamine)<sub>4</sub> were determined using the UV-visible absorbance of the compounds. Solutions of compounds were made in acetone to have UV-vis absorbance ca. 0.05 in the lowest energy Q band (ca. 1 μM) in 1 cm glass cuvettes which were exposed to direct white light at 0.41 mW/cm<sup>2</sup> using a General Electric Helical 13W, 120V AC, 60 HZ, 190mA, (FLE13HT 2/2/XL.SW) fluorescent bulb in air with the cuvette capped. There is no evidence of decomposition in the dark. UV-visible measurements were taken after two, four and eight hours to assess the stabilities of the compounds. All experiments were done side by side on the same day to minimize any experimental errors. All compounds were intact >50% after 4 h of light exposure. The redox chemistry of the amine moieties of the tomamine component may be involved in the photobleaching of the ZnPc(tomamine)<sub>n</sub> compounds.

### **Cell culture, uptake and toxicity studies**

All tissue culture medium and reagents were purchased. Dulbecco's Modified Eagle Medium (DMEM) from Sigma Aldrich and FBS and antibiotic (Penicillin Streptomycin) from Invitrogen (Carlsbad, CA). MDA-MB-231 cells were purchased from ATCC and cultured in DMEM in 10% FBS and 1% antibiotic. The cells were split once every two days to maintain a sub-confluent stock.

MDA-MB-231, human breast cancer cells were maintained in DMEM, 10% FBS, 1% antimycotic at 37 °C and in 5% CO<sub>2</sub> atmosphere were plated in cell culture dishes with coverslips for 24 hours. Cells were then

incubated with ZnPc(tomamine)<sub>1</sub>, ZnPc(tomamine)<sub>2</sub>, ZnPc(tomamine)<sub>3</sub>, and ZnPc(tomamine)<sub>4</sub> dissolved in DMSO to a final concentration of 50 nM such that there was never more than 0.5% DMSO in the solution. After 24 h incubation, cells were washed with PBS 5-6 times to remove the unbound compound and then fixed with 4% paraformaldehyde solution for 15 min at room temperature. The cells were then washed with PBS 3 times again. The number of cells were counted under an inverted microscope. Since the compounds are not fluorescent, simple fluorescence microscopy could not be used to assess dye uptake. The cultures were treated with Triton X-100 bought from Sigma-Aldrich to lyse the cells. The resulting solutions were dissolved in acetone and UV-visible absorption spectra of each well on the plate was taken to find the amount of compound present per cell.

#### *Dark toxicity*

MB-MDA-231 cells (20,000) were seeded in a 96 well plate and incubated at 37 °C and in CO<sub>2</sub> atmosphere for 48 h until 90% confluence was observed. ZnPc(tomamine)<sub>1</sub>, ZnPc(tomamine)<sub>2</sub>, ZnPc(tomamine)<sub>3</sub>, and ZnPc(tomamine)<sub>4</sub> were dissolved in DMSO and then diluted with DMEM into final working concentrations (6.25, 12.5, 25, 50, 100 μM). Compounds with different concentrations were added to the 90% confluent cells and incubated for 24 h. Then the medium containing dye was removed and washed once with PBS (pH ~ 7.4). 0.4% Trypan blue (Life Technologies™) was added to cells. The mixture was incubated at room temperature for 10 min, and trypan blue uptake was determined by counting on a hemacytometer. The IC<sub>50</sub> values were calculated from dose-response curves, which were obtained using GraphPad Prism software.

#### *Phototoxicity*

MDA-MB-231 cells were plated as described above. Then working concentrations (6.25, 12.5, 25, 50, 100 μM) of ZnPc(tomamine)<sub>1</sub>, ZnPc(tomamine)<sub>2</sub>, ZnPc(tomamine)<sub>3</sub>, and ZnPc(tomamine)<sub>4</sub> were added and incubated for 24 h. Then the medium was replaced with the fresh medium. The cells were then exposed to a white 13 W fluorescent light for 20 min (0.92 mW cm<sup>-2</sup> or 11.04 kJ m<sup>-2</sup>, which is in the typical range for PDT studies using white light).<sup>[5]</sup> Then the medium containing the dye was removed. 0.4% Trypan blue (Life Technologies™) was added to cells. The mixture was incubated at room temperature for 10 min, and trypan blue uptake (dead cells) was determined by counting on a hemacytometer. The IC<sub>50</sub> values were calculated from dose-response curves, which were obtained using GraphPad Prism software. In this case the fluorescent lamp has the spectra typical of these bulbs (General Electric Helical 13W, 120V AC, 60 HZ, 190mA, (FLE13HT 2/2/XL.SW) fluorescent bulb), and was chosen because of the minimal intensity in the UV and the near IR and IR (see figure S51 taken from <https://www.comsol.com/> and figure S52 taken from <https://publiclab.org/>).

#### **Photothermal studies**

ZnPc(tomamine)<sub>1</sub>, ZnPc(tomamine)<sub>2</sub>, ZnPc(tomamine)<sub>3</sub>, and ZnPc(tomamine)<sub>4</sub> were dissolved in DMSO and then diluted with DMEM into final working concentrations (20, 40, 60, 80, 100 μM). The final solutions were made sure not to have more than 5% DMSO. The 1.5 mL solutions in closed 2 mL borosilicate vials were then exposed to a white 13 W fluorescent lamp with intensity of 0.92 mw/cm<sup>2</sup>. Temperature was measured every 4 min with a digital thermometer. After 20 min, an increase of 12±2, 15±2, 15±2 and 17±2 °C was observed for ZnPc(tomamine)<sub>1</sub>, ZnPc(tomamine)<sub>2</sub>, ZnPc(tomamine)<sub>3</sub>, and ZnPc(tomamine)<sub>4</sub> respectively. “White light” typically refers to the entire visible spectrum of the lamp used. This power is similar to that used in the PDT studies.

#### **Octanol/PBS partition studies**

Octanol-PBS partition coefficient values were determined for ZnPc(tomamine)<sub>1</sub>, ZnPc(tomamine)<sub>2</sub>, ZnPc(tomamine)<sub>3</sub>, and ZnPc(tomamine)<sub>4</sub> using the classic shake flask method.<sup>[6]</sup>

#### **Photoacoustic studies**

**Sample Preparation.** Phthalocyanines [ZnPc(tomamine)<sub>1</sub>, ZnPc(tomamine)<sub>2</sub>, ZnPc(tomamine)<sub>3</sub> and ZnPc(tomamine)<sub>4</sub>] and a standard indocyanine green (ICG) dye were suspended in DMSO and 10 μM aqueous solutions made (<1% DMSO cosolvent). A 1.5% agarose tissue phantom was also made with 1.2% v/v of a commercial 20% intralipid emulsion added to mimic scattering and absorption.<sup>[7]</sup> The fresh

dye solutions were loaded into plastic pouches and suspended in this tissue phantom at 50 °C in a 20 mL plastic syringe. The phantom was then allowed to cool to room temperature and set overnight before being removed from the syringe. There was no evidence of aggregation of the dyes in the amphipathic agarose phantom media. Each phantom contained 3 samples in separate pouches: one ICG standard and two different concentrations of the ZnPc(tomamine) dye. The ICG and high concentration ZnPc(tomamine) samples were prepared at equal concentrations.

**Multispectral Photoacoustic Tomography (MSOT) Imaging.** MSOT was performed on an inVision 256-TF instrument (iThera Medical), which has been described previously.<sup>[8]</sup> The cylindrical molded tissue phantom with the embedded dye-pouches was loaded into the instrument and submerged in a water bath kept at 34 °C. A wavelength-tunable light source is split and distributed about the sample to provide cylindrically symmetrical illumination of each cross-section. The detector has a similar cylindrical configuration, wrapping 270° about the sample axis. The sample is z-translated through this source / detector ring in 1.0 mm steps to collect tomographic cross-sections. For each pixel within a cross-section (*i.e.* each voxel), the instrument scans excitation wavelengths from 690 to 900 nm in 10 nm increments, collecting and averaging 5 photoacoustic intensity measurements at each wavelength. Three dimensional tomograms were constructed from these cross-sections, and some of the images are shown in Figure S39.

**Photoacoustic Spectra.** Average photoacoustic (PA) spectra, *i.e.* plots of PA intensity vs. excitation wavelength, were reconstructed from the tomographic information for each dye. Representative cross-sections were chosen for each dye-pouch, and the spectra of several pixels within each cross section were averaged together. These averaged PA spectra are shown in the manuscript. In all the figures, the green color indicates the indocyanine green (ICG) standard used in PA<sup>[9]</sup> and the other color (red, blue, orange and purple) represents the corresponding tomamine-ZnPc conjugate in the same phantom. It should be noted that the spectra of the individual dyes are very broad and overlap significantly, reducing the effectiveness of this deconvolution procedure. This manifests as the apparent mixing of 2 colors in a single pouch in some of the tomograms, even though the dyes were not physically mixed in any of these experiments.

**Results.** In the tomograms acquired, the detected PA intensity cannot discriminate between the various dyes present in the phantom. Therefore, a direct classical least-squares deconvolution technique was applied using the individual dye spectra to obtain the 2-color images seen in Figure 38A-D.

### SERRS Studies

Raman spectroscopy takes advantage of inelastic scattering between vibrational modes to yield highly specific 'finger-print' spectra that can identify a compound. Unlike fluorescence, spectral peaks of compounds are narrower, and the intensity does not photo bleach over time. This gives Raman spectroscopy the ability to deconvolve signals in complex mixtures and the advantage of monitoring specific entities over a period of time without signal decay.<sup>[10]</sup> However, since the intrinsic Raman signal of molecules is weak, coupling molecules of interest with the electric field at the surface of plasmonic materials significantly enhances the signal. Surface enhanced Raman (SERS) can use plasmonic nanoparticles with any molecule of interest that has affinity to either gold or silver.<sup>[11]</sup> Recently SERS is used in variety of applications including biomedical imaging, trace detection of pesticides in food, explosive substances in airports, and monitoring catalysis over time.<sup>[12]</sup> We incorporated the ZnPc(tomamine)<sub>n</sub> molecules into a previously reported gold nanostructure<sup>[13]</sup> to measure their Raman capabilities for applications in biomedical imaging and sensor design.

Gold nanostars were synthesized by rapid reduction of gold chloride trihydrate in the presence of ascorbic acid according to previously reported methods. This yields about 5 mL of nanostars that are typically 1 nM in concentration. After dialysis to remove all reagents, these are stable in solution for months without stabilizing agents.<sup>[13]</sup> Nanostars were chosen as they have an absorption maximum in the red and near IR portion of the visible spectrum<sup>[14]</sup> and this correlates well with both the absorption of our dyes and the irradiation wavelength of the laser used, which results in better

over-lap of the contributing factors to enhancement of the Raman signal, surface enhanced resonance Raman spectra (SERRS).<sup>[15]</sup>

The platform is based on an earlier design<sup>[13]</sup> based on a surfactant-free shape control of gold nanoparticles enabled by unified theoretical framework of nanocrystal synthesis (Figure S40). The SERRS data for the control IR 780, the four tomamine compounds, and precursor and TEM images of the nanoplatform for each dye are in Figures S41-S46. A Renishaw (Gloucestershire, UK) *inVia* Raman microscope was used to collect the data.

Briefly, gold nanostars were synthesized by rapid (30 seconds) reduction of gold chloride trihydrate (20 mM solution; 8 mL) in the presence of ascorbic acid (60 mM solution; 800 mL). The solution turns from transparent to a deep blue color upon addition of the gold salt.

The dyes are incorporated by a fast adsorption of the dyes on to the surface of the particles and simultaneous silication to passivate the dye-covered particles.<sup>[13, 16]</sup> Adsorption is favored due to the affinity of the many nitrogen atoms in phthalocyanine molecules to gold. Briefly, a mixture of 0.5 mL as-produced stars and 80  $\mu$ L 28%-ammonium hydroxide in 1.25 mL ethanol was added to a vortexed mixture of 200  $\mu$ L silica precursor, tetraethyl-orthosilicate (TEOS), 80  $\mu$ L distilled water, and 0.125  $\mu$ mol dye (dissolved in 5-10  $\mu$ L DMF) in 4 mL of isopropanol. Reactions were shaken at 300 rpm for 15 minutes, and then quenched by addition of more ethanol. Particles were washed three times with ethanol and re-dispersed in distilled water.

Ten microliters of the re-dispersed star solutions were put into a 384 flat bottom well plate. The area of the wells was scanned at a 200  $\mu$ m step-size in the x-direction and a 14.2  $\mu$ m step-size in the y-direction. To obtain Raman spectra, an *inVia* Renishaw Raman spectroscopy was used with a 785 nm diode laser at 160 mW laser power, 5x objective, in StreamLine high-speed acquisition mode. With StreamLine imaging, multiple spectra are acquired under a continuous one second laser irradiation, with each point irradiated for about 0.1 seconds. Spectra are background corrected to remove fluorescence signal.

Transmission Electron images were taken to reflect the morphology of the particles. Samples were deposited on a 300 mesh carbon film copper grid and images were taken on a JEM-2100 200 keV high resolution transmission electron microscope with system-optimized exposure times.

DFT calculated Raman B3LYP 6-31G+ (d.p.) basis set was used.

### ***Discussion of substitution chemistry and electronic spectra***

Primary alkoxide nucleophiles were thought to react first at the  $\alpha$  position (the synthesis uses 1.6 M n-BuLi and temperatures of 110-130  $^{\circ}$ C) but there was no NMR data to support this conclusion.<sup>[17]</sup> Significant computation efforts have been devoted to understanding the electronic spectra of PC, and for the free base Pc the  $\alpha$  carbons contribute more to the HOMO than the  $\beta$  carbons, so electron donating groups destabilize the HOMO.<sup>[18]</sup> For electron donating groups, intramolecular charge transfer bands arising from the donor atom lone pair to the macrocycle  $\pi^*$  orbital can significantly contribute to the observed spectral shifts. However, recent studies conclude that larger substituents such as sugars preferentially react at the  $\beta$  position.<sup>[19]</sup> The systematic study of the substitution 1 to 16 of the F on ZnPcF<sub>16</sub> by alkane thiols, coupled with TDDFT calculations, concludes that kinetic products dominate and the  $\beta$  position react first at room temperature.<sup>[20]</sup> There is a small ca. 6 nm red shift in the Q bands for each of the first eight substitutions. After the initial eight substitutions, distortion of the Pc induced by  $\alpha$  substitution is indicated by large Stokes shifts, a dramatic decrease in the fluorescence quantum yield and rate constant  $k_f$ , and a jump in the FWHM of the lowest energy Q band.<sup>[20]</sup>

$^{19}\text{F}$  NMR data is consistent with  $\beta$  substitutions as previously reported<sup>[19-20]</sup> where the  $\beta$  F appears downfield compared to  $\alpha$  F, and as the number of substitutions increases from 1-4 there is a disappearance of  $\beta$  F. HRMS, H-NMR and C-NMR shows that the two amine groups on the tomah forms a seven membered ring where the two  $\beta$  F's are replaced by one tomah moiety. There are several reports that the  $\beta$  position will be substituted first under mild conditions, then the alpha substitutions will be possible under forcing conditions such as high temperature and strong bases such as (NaH and Na).<sup>[20]</sup> The NMR shows that we indeed have only the  $\beta$  substitutions. The difference in  $\alpha$  versus  $\beta$  reactivity also may be attributed to the mechanism of nucleophilic aromatic substitution reactions on the macrocycle.

The H-NMR clearly indicates the formation of the seven membered ring. A small red shift of about 10 nm in the Q bands is expected from substitution of the  $\beta$  F by the tomah amine on one isoindole,<sup>[18, 20]</sup> but a much larger shift is observed, from 672 nm to 745 nm. We agree that the large red shift, the quenched fluorescence, close to no singlet oxygen yield, and strong solvatochromism can be explained by an intramolecular charge transfer (ICT) band,<sup>[18]</sup> but these can also be explained by distortion of the macrocycle wherein there is a significant dipole.<sup>[21]</sup> Though we cannot completely rule out ICT, the strong photo-thermal conversion of the absorbed light and minimal photobleaching in air argue against significant ICT. Also, ICT is postulated for electron donors on the  $\alpha$  position, and here the attachment to the  $\beta$  position.

The displayed solvatochromism is not necessarily due to solvent polarity alone, but is likely a mixture of polarity, polarizability, coordinating ability to the Zn(II) and hydrogen bonding ability. Different solvents will have different interactions with the central metal and the nitrogens and oxygens in the tomah substituents, and some of these interactions may depend on the particular conformation or overall flexibility of the Pc. For example, the peak shift shown in Table 1 between acetone and DMSO is significant (>25 nm), but these solvents have similar polarities so it would be inappropriate to assume that shift is entirely due to this factor alone. Further, we have shown previously that nitroporphyrins with a significant charge transfer character may not display a significant absorbance peak shift even between DMSO and toluene.<sup>[22]</sup> While the situation may be different for these phthalocyanines, there is no reason to assume *a priori* that charge transfer is a necessary condition, especially given the nature of these substituents.

We note that short triplet state lifetimes and/or low triplet state energy are possible explanations for the low singlet oxygen quantum yields. But, it would be unusual for this Pc triplet to have such a low energy or be so short lived as to have a completely negligible singlet oxygen yield. Phthalocyanines commonly have singlet oxygen yields above 50%, and even nitroPcs have a ca. 11% singlet oxygen yield. Charge transfer states would therefore seem less likely to explain the complete quenching of the triplet state.

In terms of the energetics needed to distort the Pc, the Zn(II) does not fit perfectly into the Pc core and can contribute to lowering the barrier to distortion.<sup>[23]</sup>

### Discussion of SERRS spectra

**Table S1.** SERRS peaks

| Dye         | SERRS Wavenumber (cm <sup>-1</sup> ) | Intensity cps         |
|-------------|--------------------------------------|-----------------------|
| ZnF16Pc     | 733, 750, 1526                       | 84.1, 115.2, 84.2     |
| Mono-Tomah  | 726, 750, 1518                       | 39.7, 119.7, 36.7     |
| Di-Tomah    | 730, 751, 1518                       | 271.6, 470.5, 103.5   |
| Tri-Tomah   | 730, 751, 1517                       | 310.2, 615.8, 119     |
| Tetra-Tomah | 730, 751, 1516                       | 1001.2, 1689.9, 264.2 |



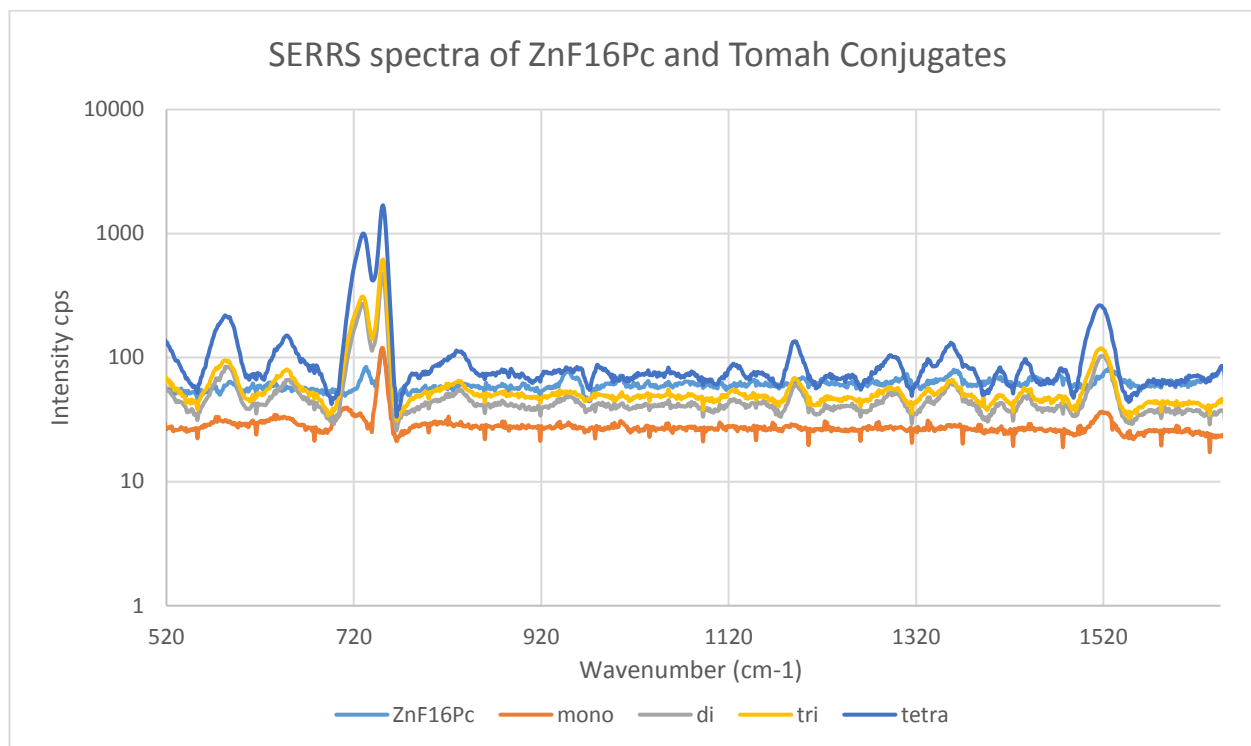

Base on assignments of the  $\text{ZnPc}(\text{SO}_3)_4$ , for the  $\text{ZnPcF}_{16}$  the peak at  $750 \text{ cm}^{-1}$  is likely the antisymmetric deformation of the macrocycle, and that at  $1526 \text{ cm}^{-1}$  is likely the isoindole stretching.<sup>[24]</sup> These shift upon conjugation of tomamine; however, the spectral shifts between higher substitutions (di to tetra) are not significantly different. The peak at  $733 \text{ cm}^{-1}$  is likely the C-F bending, assignments based on 1,2,4,5-tetrafluorobenzene<sup>[25]</sup> in analogy to the tetrafluoro isoindoles in the parent  $\text{ZnPcF}_{16}$ . The fluorescence quantum yield of IGC is 2-6%, so most of its energy is dissipated by internal conversion.<sup>[26]</sup>

**TABLE S2.** Fundamental vibration frequencies for 1,2,4,5-tetrafluorobenzene (liquid).<sup>2</sup>

|                 | $a_g$ | $B_{1g}$ | $b_{2g}$ | $b_{ag}$ | $a_u$  | $b_{1u}$ | $b_{2u}$ | $b_{3u}$ |
|-----------------|-------|----------|----------|----------|--------|----------|----------|----------|
| C- H stretching | 3097  |          |          |          |        | 3088     |          |          |
| C-F stretching  | 1335  |          | 1196     |          |        | 1222     |          | 1277     |
| C-C stretching  | 1374  |          | 1643     |          |        | 1439     |          | 1534     |
| C-C breathing   | 748   |          |          |          |        | 963      |          | 853      |
| C-F bending     | 832   | 417      | 635      | 669      | (-600) | 700      | 461      | 755      |
| C-H bending     |       |          | 1130     | 871      |        |          | 869      | 1164     |
| C-C-C bending   | 487   |          | 202      | 295      | (140)  |          | (240)    |          |

Highlighted in yellow are numbers that correspond to the major peaks  $\text{ZnPcF}_{16}$  spectra in the measured spectrum ( $520\text{-}1650\text{cm}^{-1}$ ). Given the low signal to noise and possible overlapping, some peaks are not observed.

## Quantum yield of singlet oxygen production

The comparative method was used to determine singlet oxygen quantum yields ( $\Phi_{\Delta}$ ) of ZnPc(tomamine)<sub>1</sub>, ZnPc(tomamine)<sub>2</sub>, ZnPc(tomamine)<sub>3</sub>, and ZnPc(tomamine)<sub>4</sub> in deuterium acetone (d-acetone). Rose bengal with known  $\Phi_{\Delta} = 0.70$  in acetone is used as a standard reference (Figure S47).<sup>[27]</sup> Samples of ZnPc(tomamine)<sub>1</sub>, ZnPc(tomamine)<sub>2</sub>, ZnPc(tomamine)<sub>3</sub>, and ZnPc(tomamine)<sub>4</sub> and rose bengal were dissolved in d-acetone. The absorbance of all samples and rose bengal reference was adjusted fitting into the range of 0.05-0.6 at 532 nm. The slopes derived from the plots of singlet oxygen intensity at 1270 nm vs absorbance at 532 nm were used for quantum yield calculations according to the following equation.<sup>[28]</sup> A Q-switched Nd:YAG laser with a pulse duration of 3-4 ns and a maximum energy of 30 mJ at 532 nm (Polaris II-20, New Wave Research Merchantek Products) and a repetition rate of 20 Hz in combination with a FT 200 Fluorimeter (Picoquant) equipped with an InGaAs Hamamatsu micro channel photomultiplier were employed for time-resolved <sup>1</sup>O<sub>2</sub> luminescence measurements. The generation of singlet oxygen from these compounds was inefficient with  $\Phi_{\Delta}$  values determined to be 0.021 for ZnPc(tomamine)<sub>1</sub>, 0.0091 for ZnPc(tomamine)<sub>2</sub>, 0.017 for ZnPc(tomamine)<sub>3</sub> and 0.0040 for ZnPc(tomamine)<sub>4</sub> (Figure S47).

$$\frac{\Phi_{Standard}}{\Phi_{Unknown}} = \frac{Slope\ from\ Standards}{Slope\ from\ Unknowns}$$

## Spectroscopy of compounds

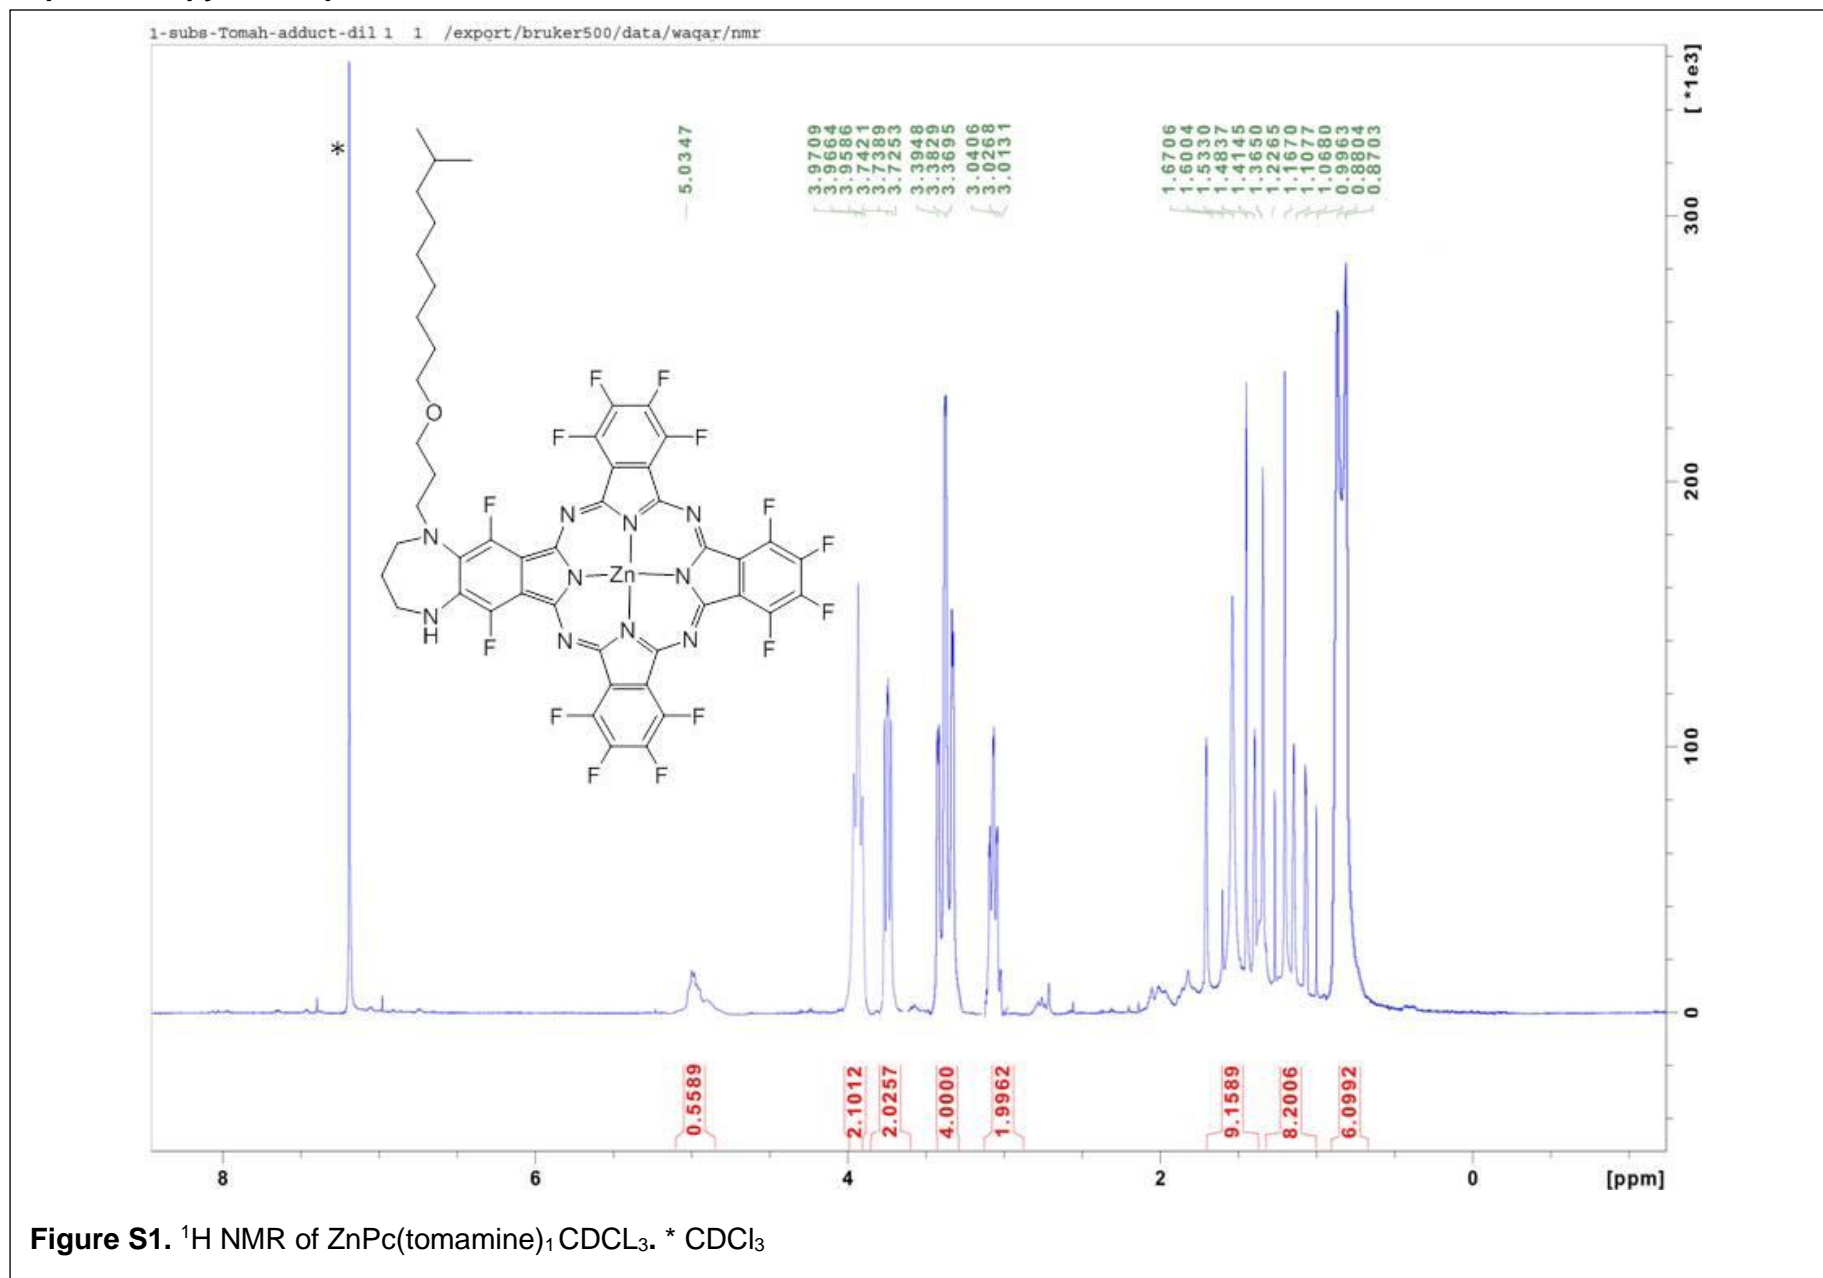Figure S1. <sup>1</sup>H NMR of ZnPc(tomamine)<sub>1</sub> CDCl<sub>3</sub>. \* CDCl<sub>3</sub>

2T CDC13 1 1 /export/bruker500/data/waqar/nmr  
AAACRYOPROTON CDC13 /opt/topspin.waqar.13

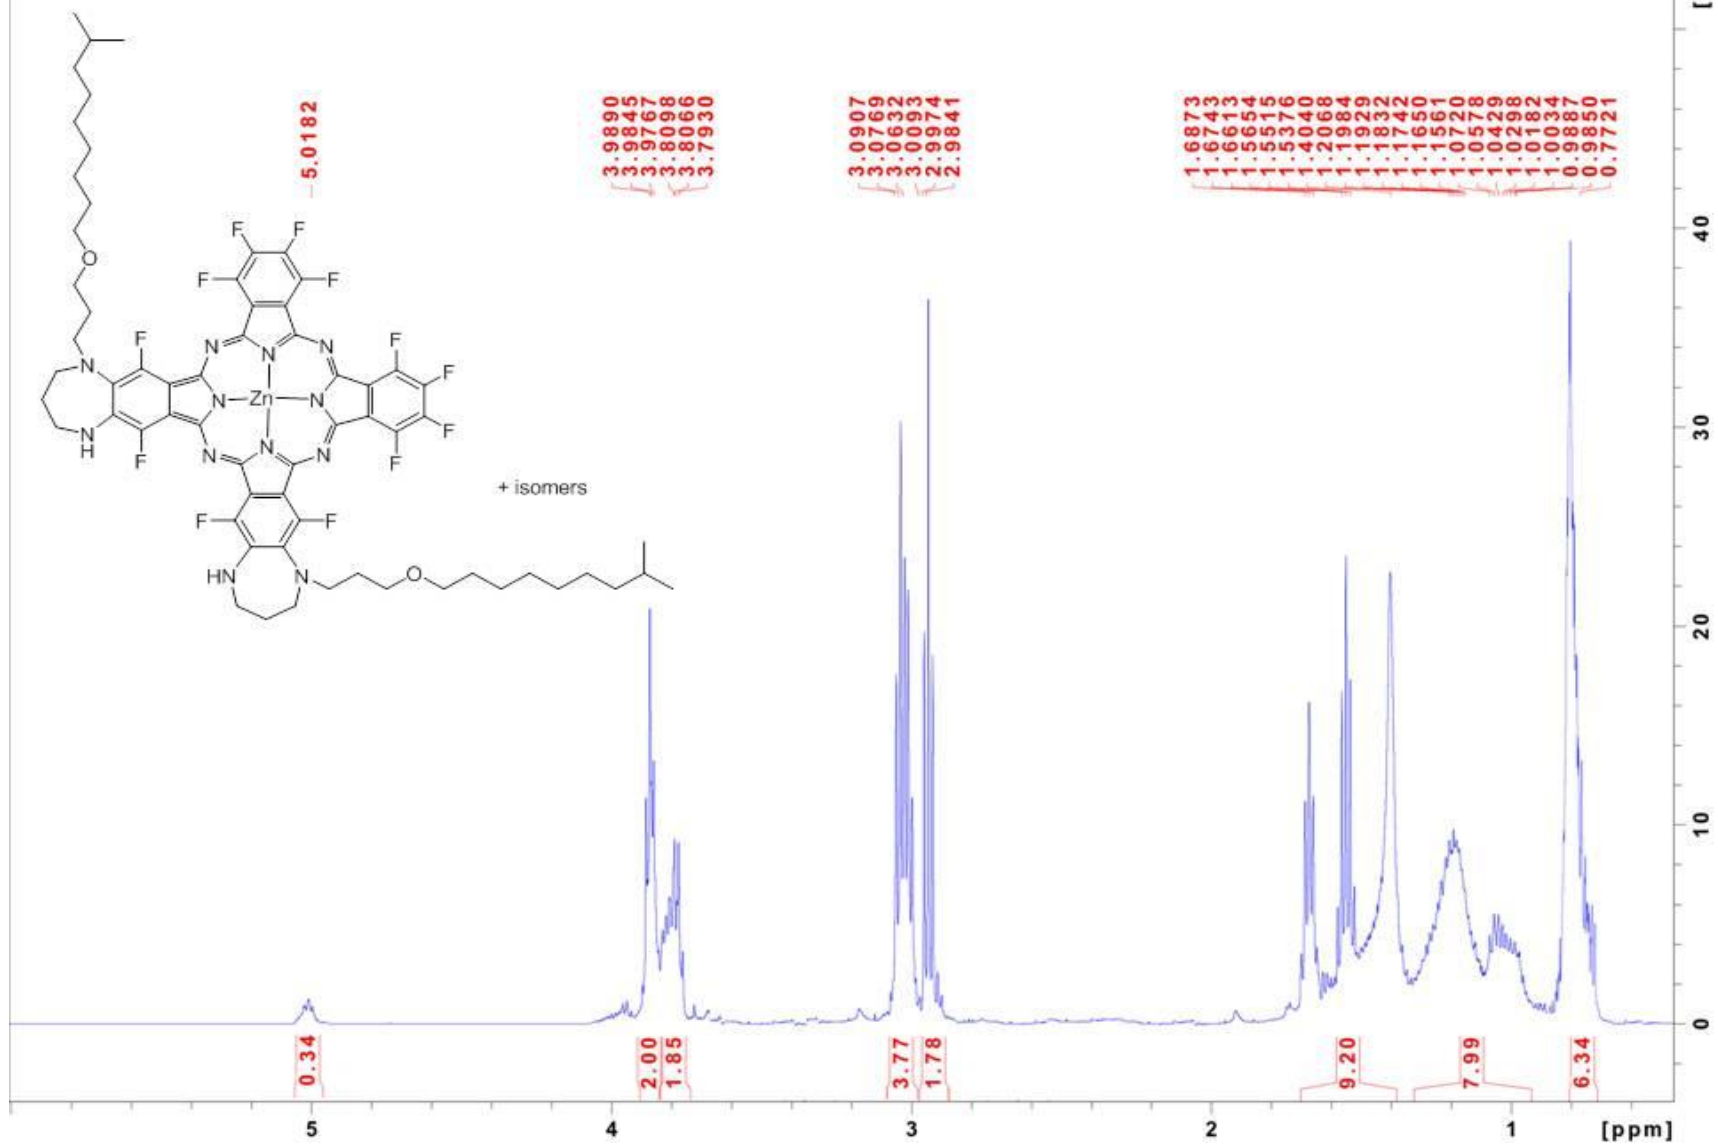

Figure S2. <sup>1</sup>H NMR of ZnPc(tomamine)<sub>2</sub> in CDCl<sub>3</sub>.

3T CDC13 1 1 /export/bruker500/data/waqar/nmr  
AAACRYOPROTON CDC13 /opt/topspin waqar 14

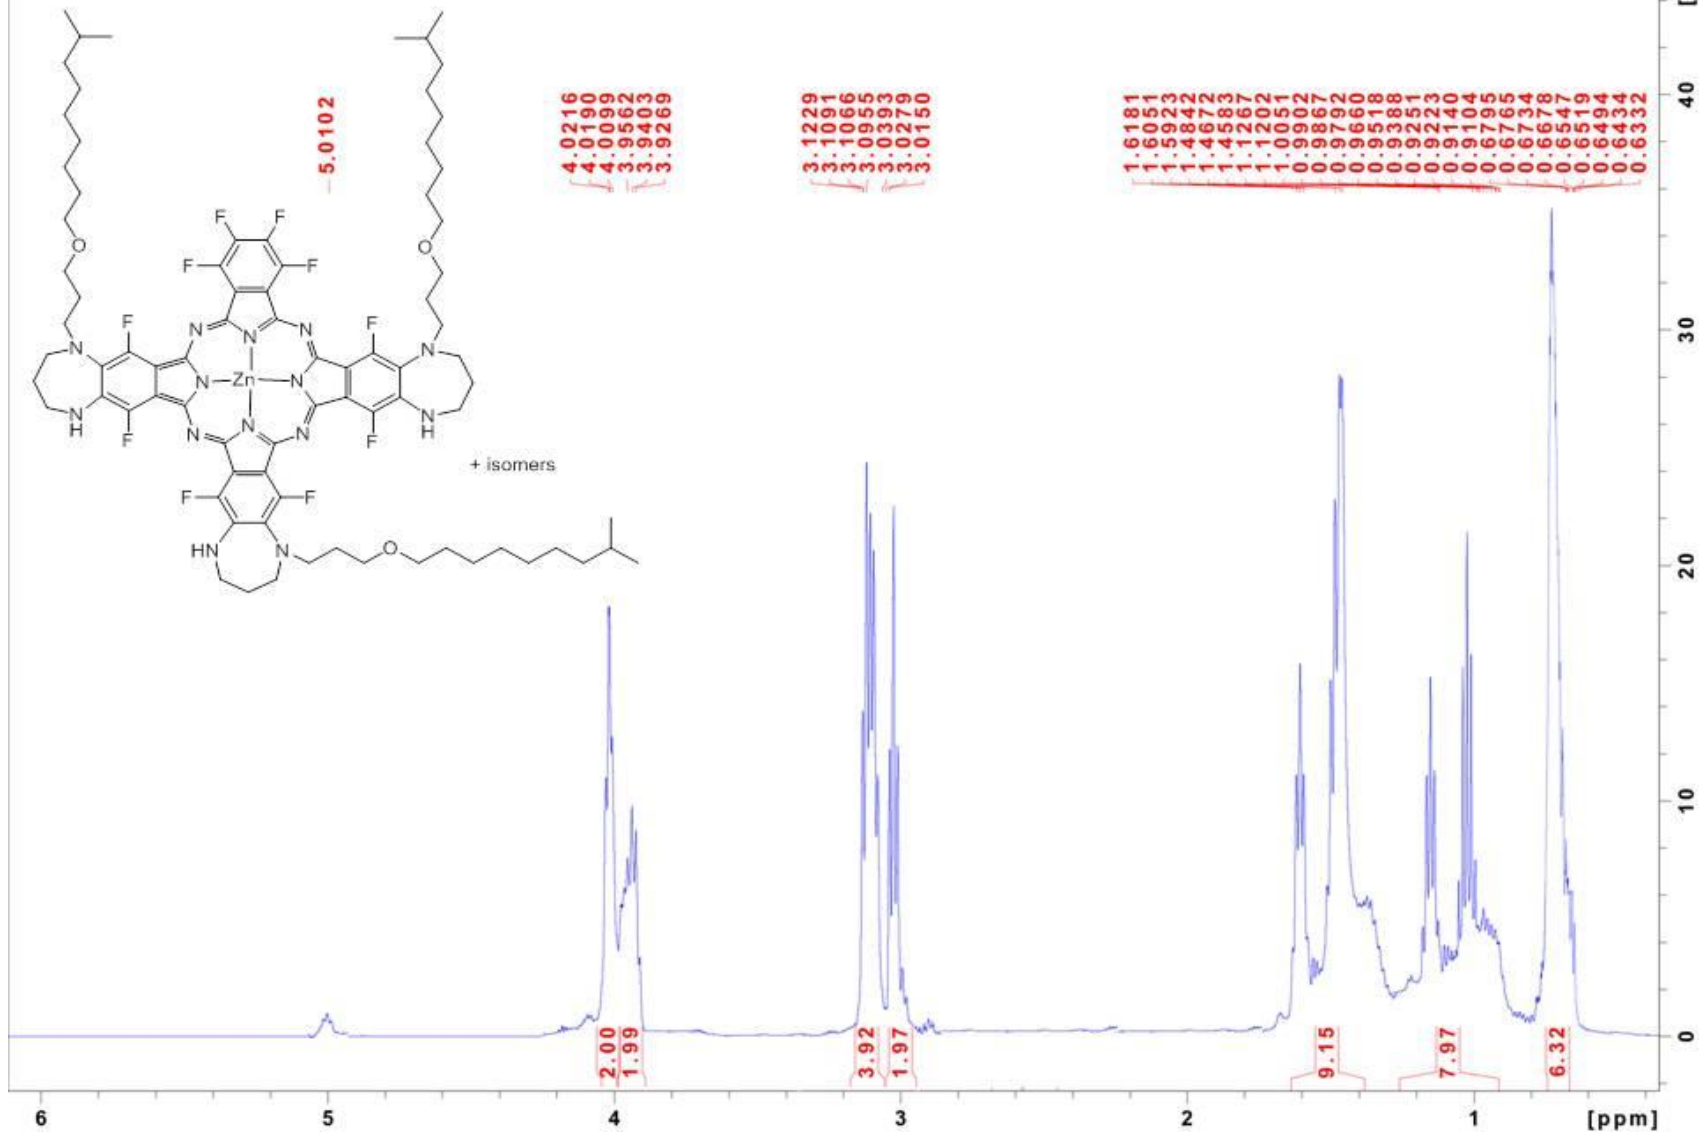

Figure S3. <sup>1</sup>H NMR of ZnPc(tomamine)<sub>3</sub> in CDCl<sub>3</sub>.

4T\_CDCl3 1 1 /export/bruker500/data/waqar/nmr

AAACRYOPROTON CDCl3 /opt/topspin waqar 15

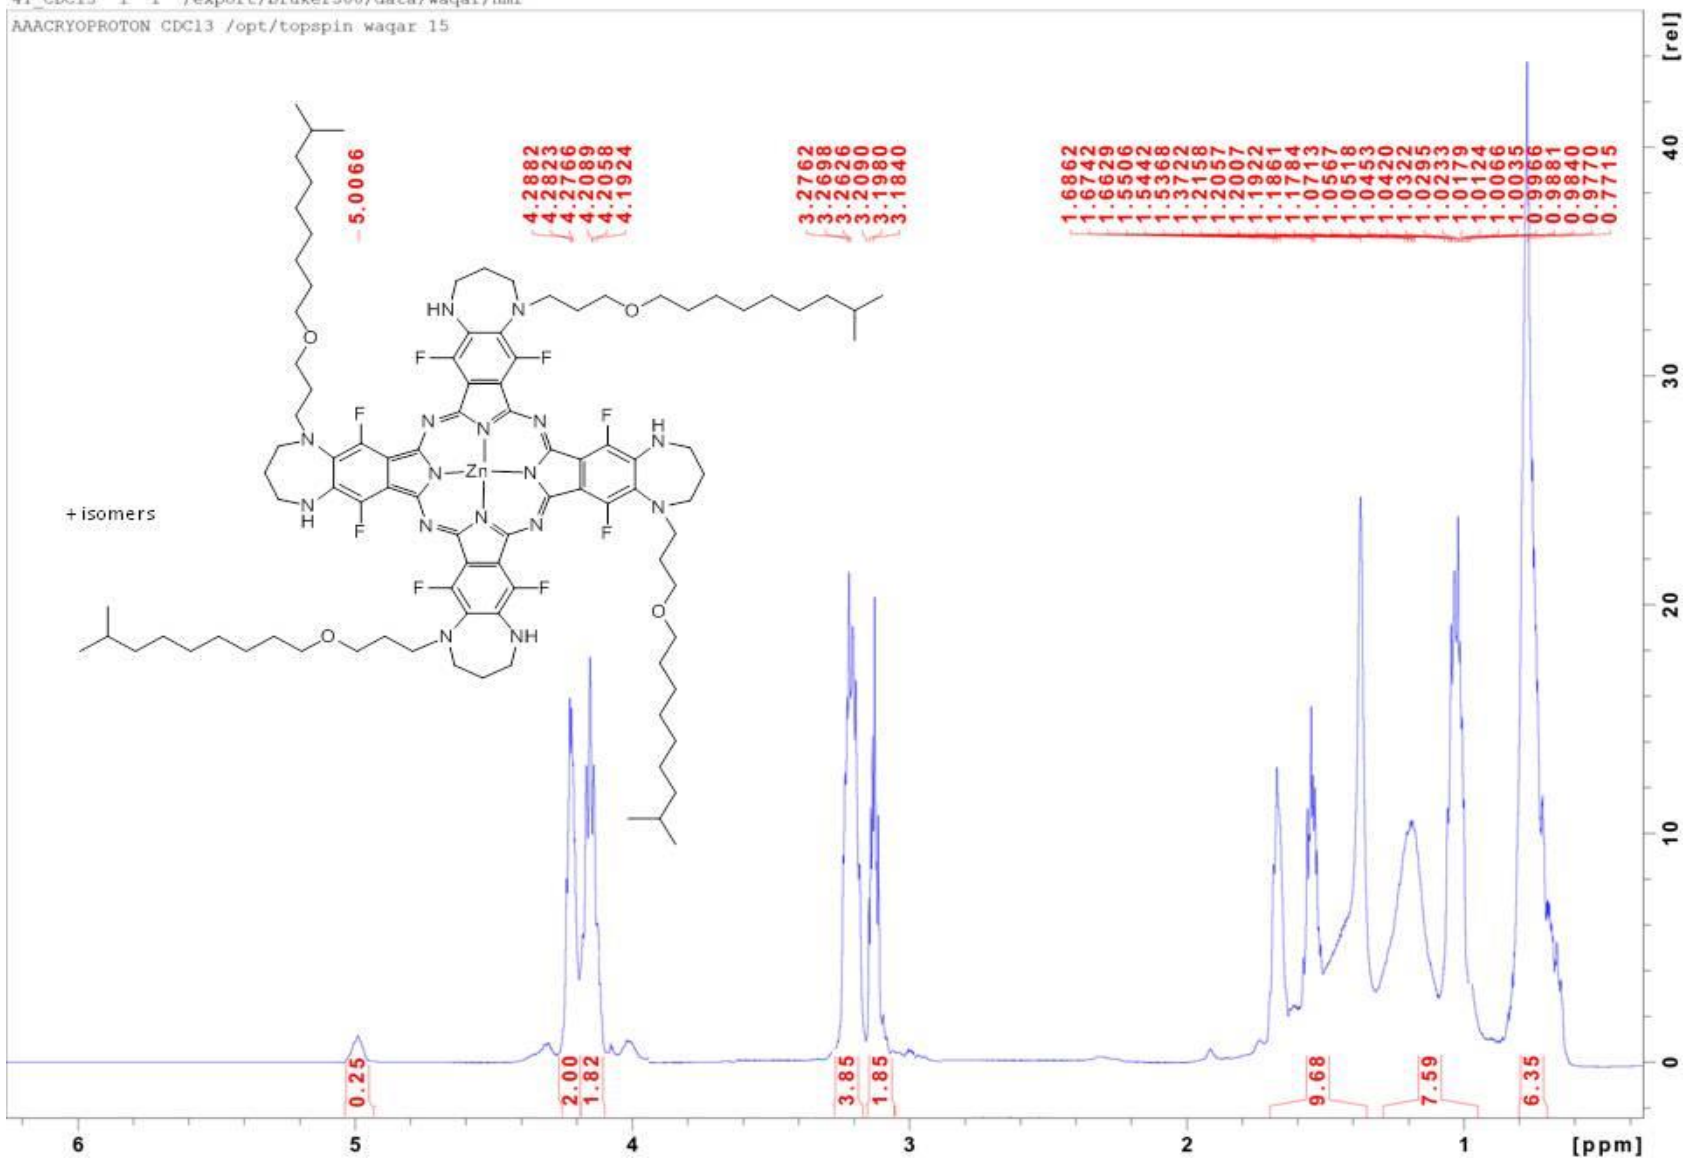

Figure S4. <sup>1</sup>H NMR of ZnPc(tomamine)<sub>4</sub> in CDCl<sub>3</sub>.

1T\_CDCl3\_C 1 1 /export/bruker500/data/waqar/nmr  
AAACRYOCARBON CDCl3 /opt/topspin waqar 12

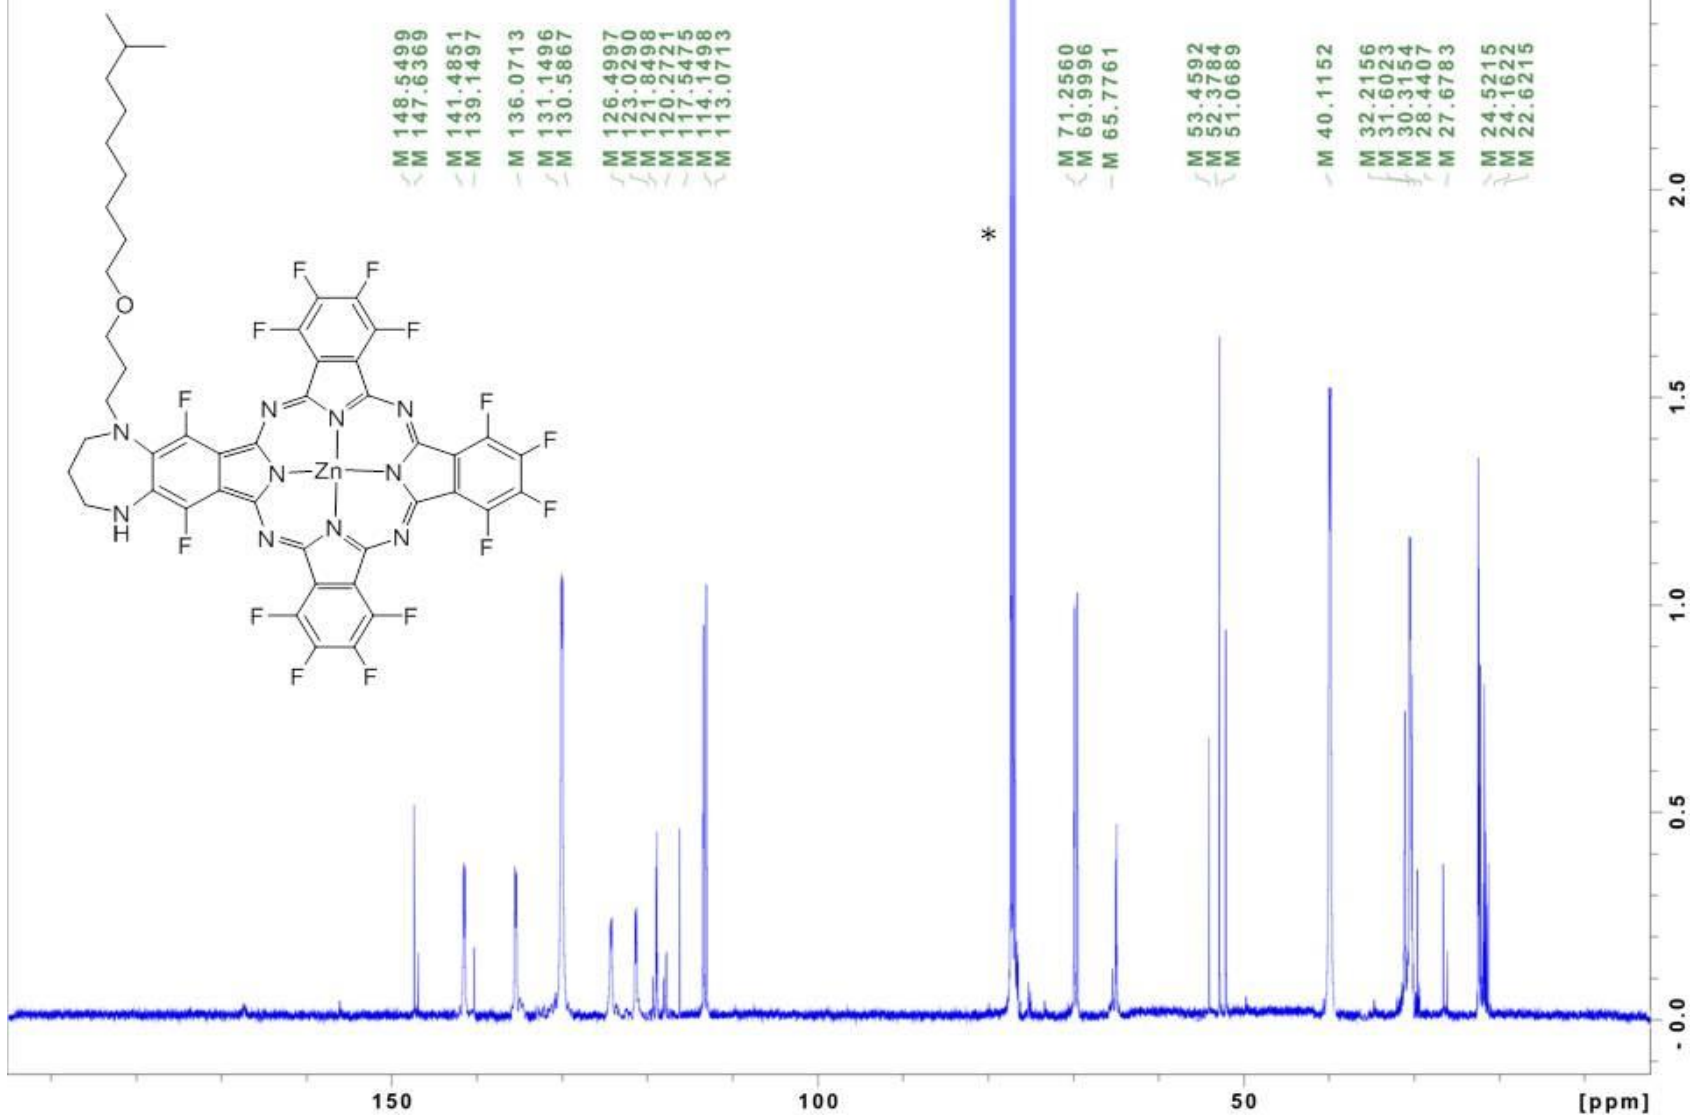

Figure S5. <sup>13</sup>C NMR of ZnPc(tomamine)<sub>1</sub> in CDCl<sub>3</sub>. \* CDCl<sub>3</sub>

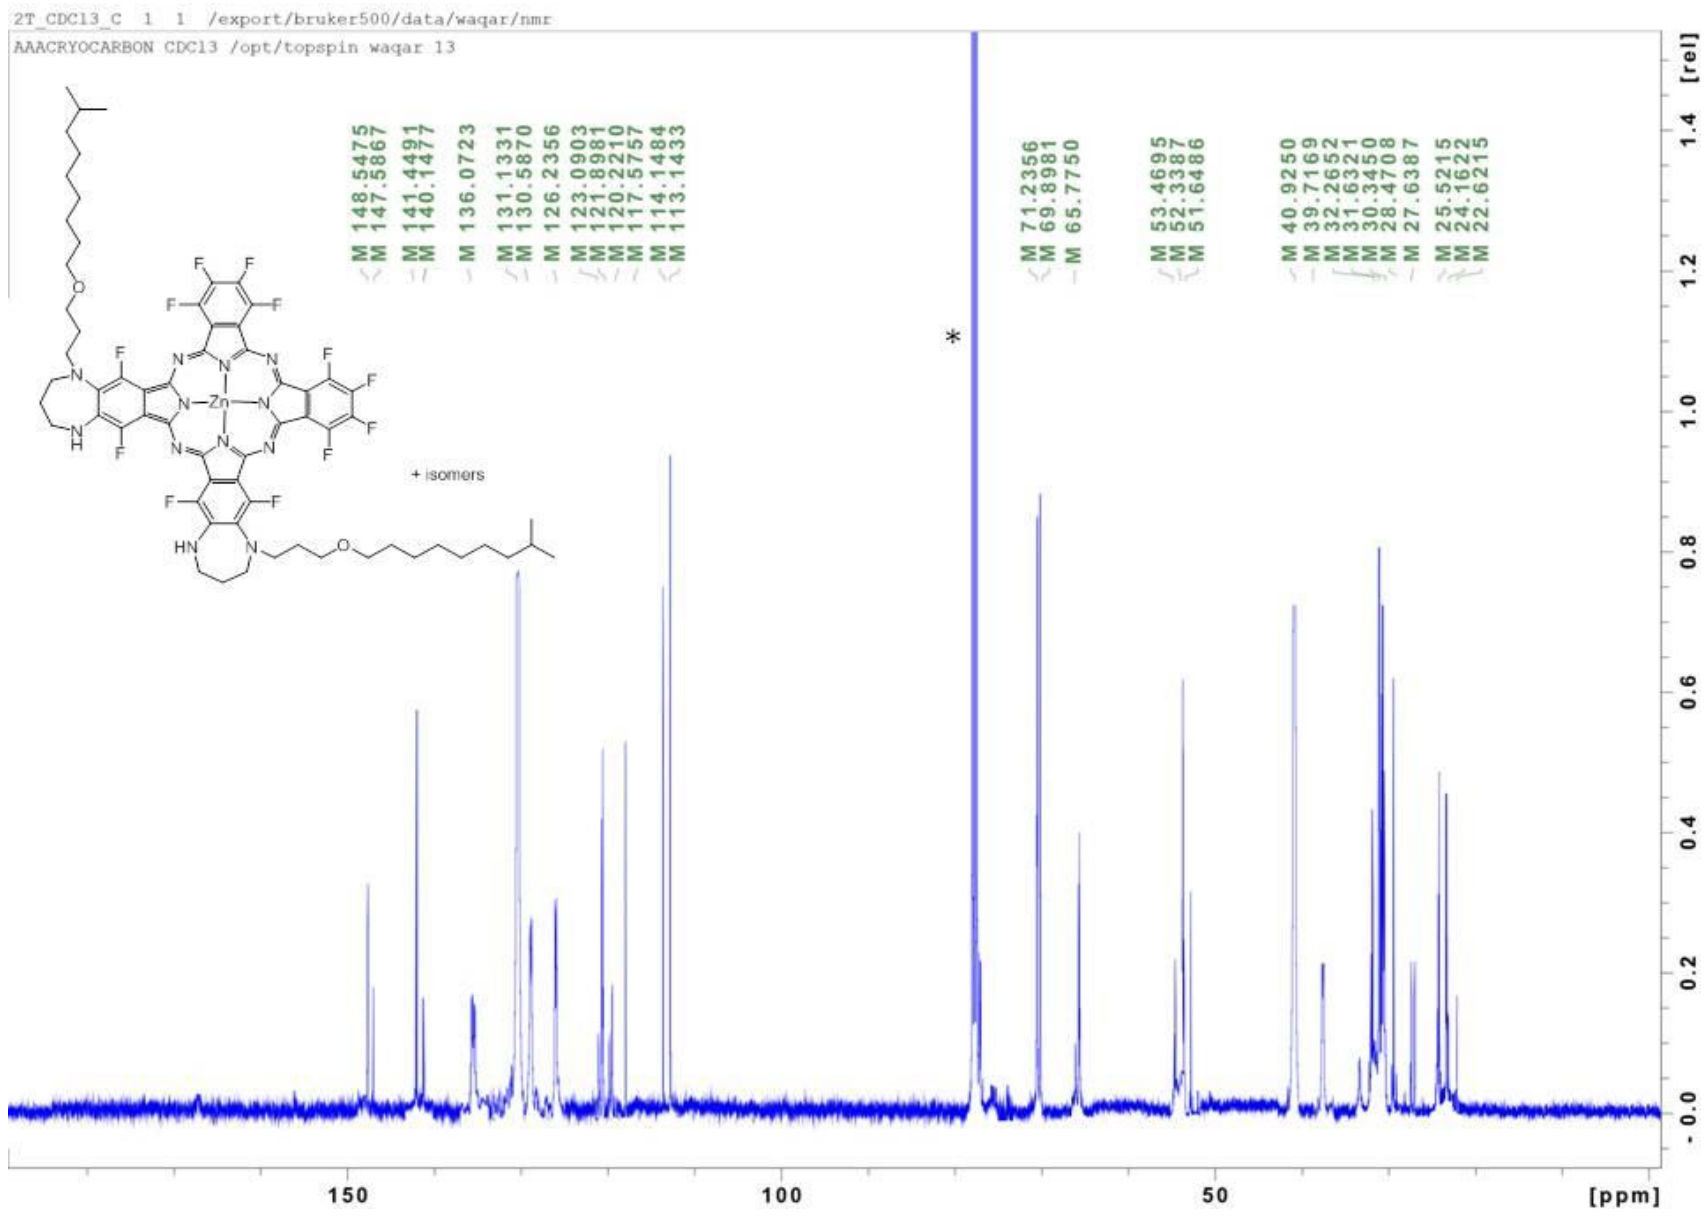

Figure S6. <sup>13</sup>C NMR of ZnPc(tomamine)<sub>2</sub> in CDCl<sub>3</sub>. \* CDCl<sub>3</sub>



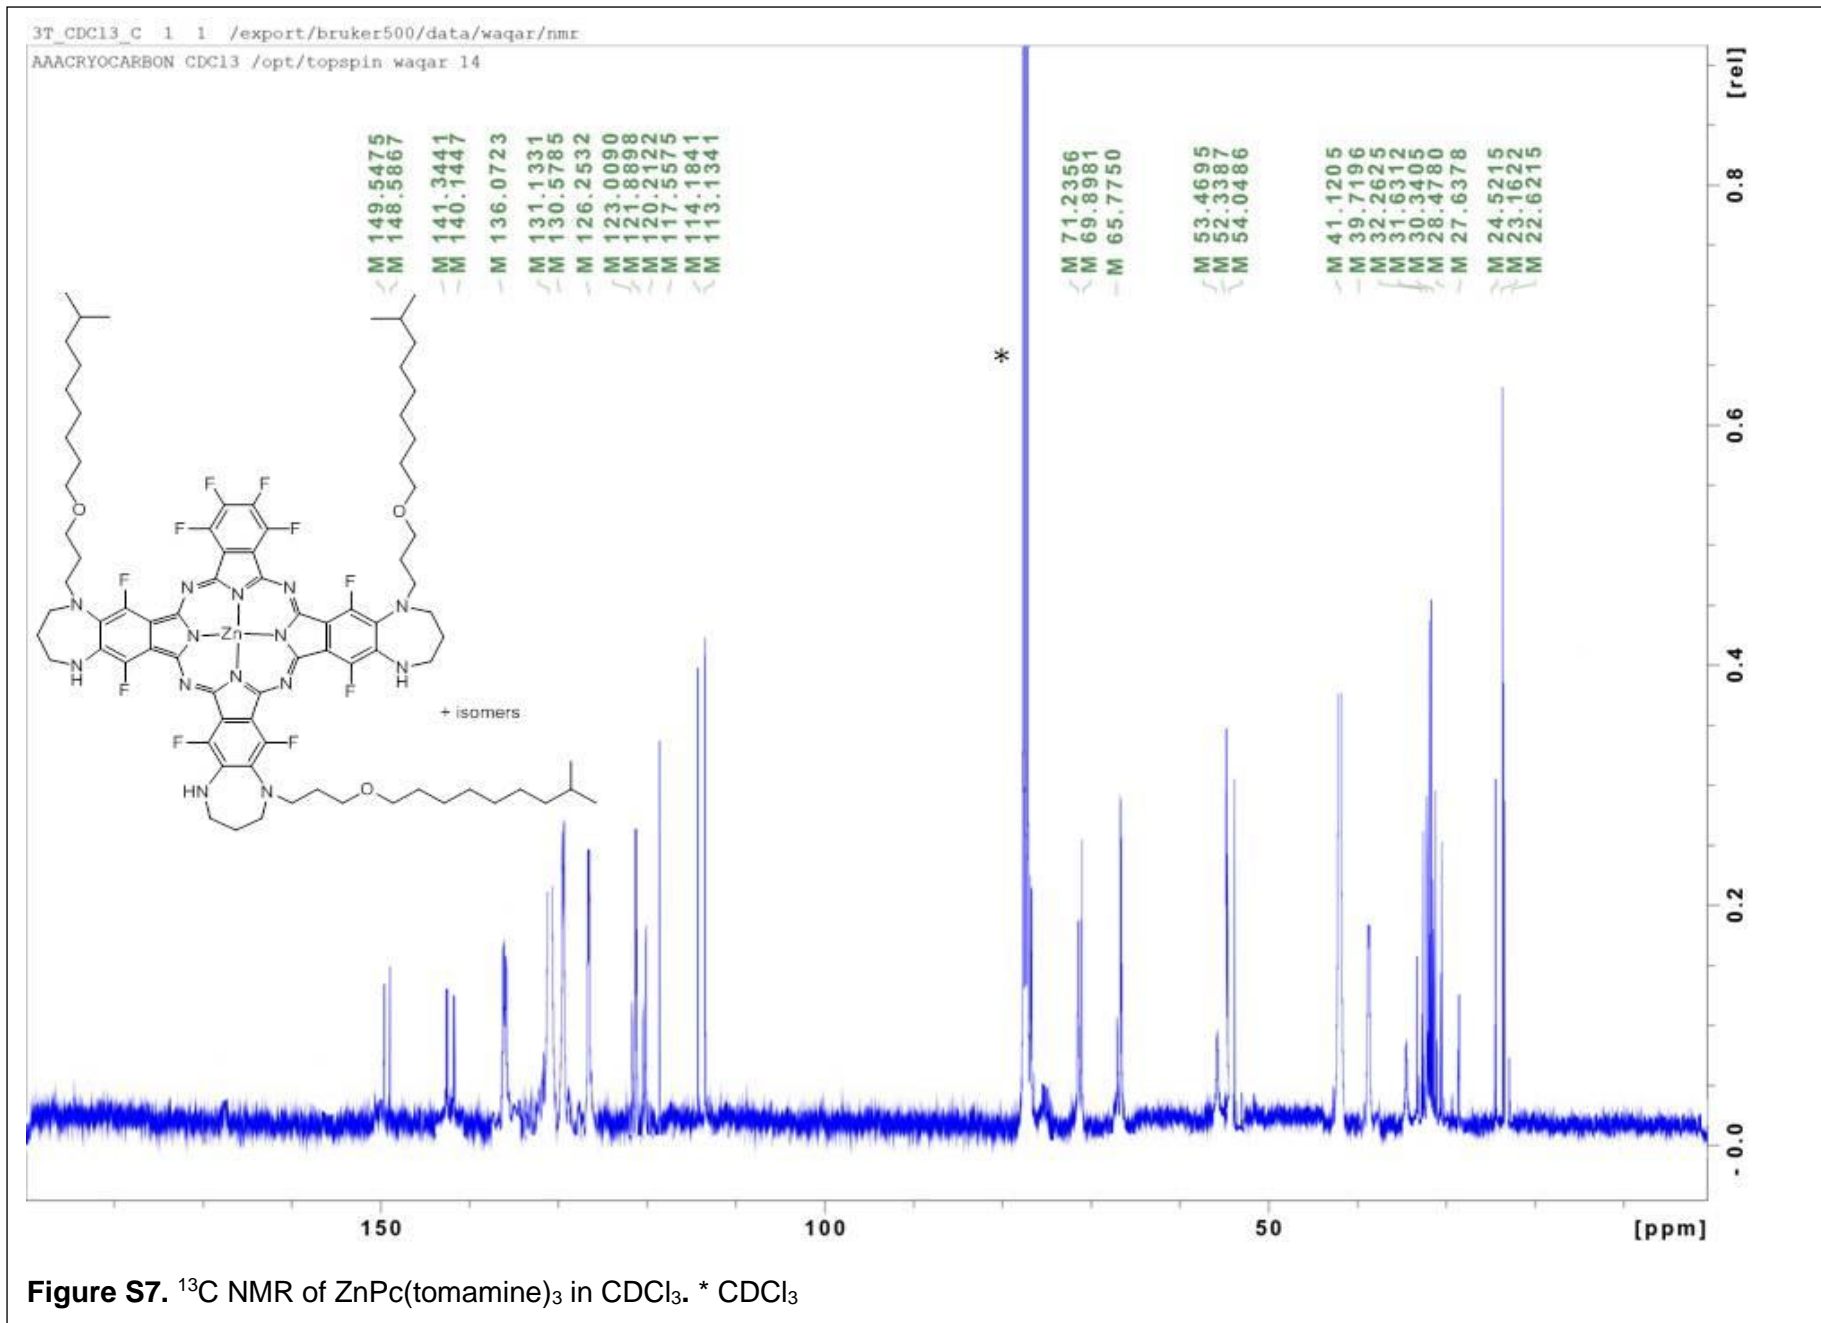

Figure S7. <sup>13</sup>C NMR of ZnPc(tomamine)<sub>3</sub> in CDCl<sub>3</sub>. \* CDCl<sub>3</sub>

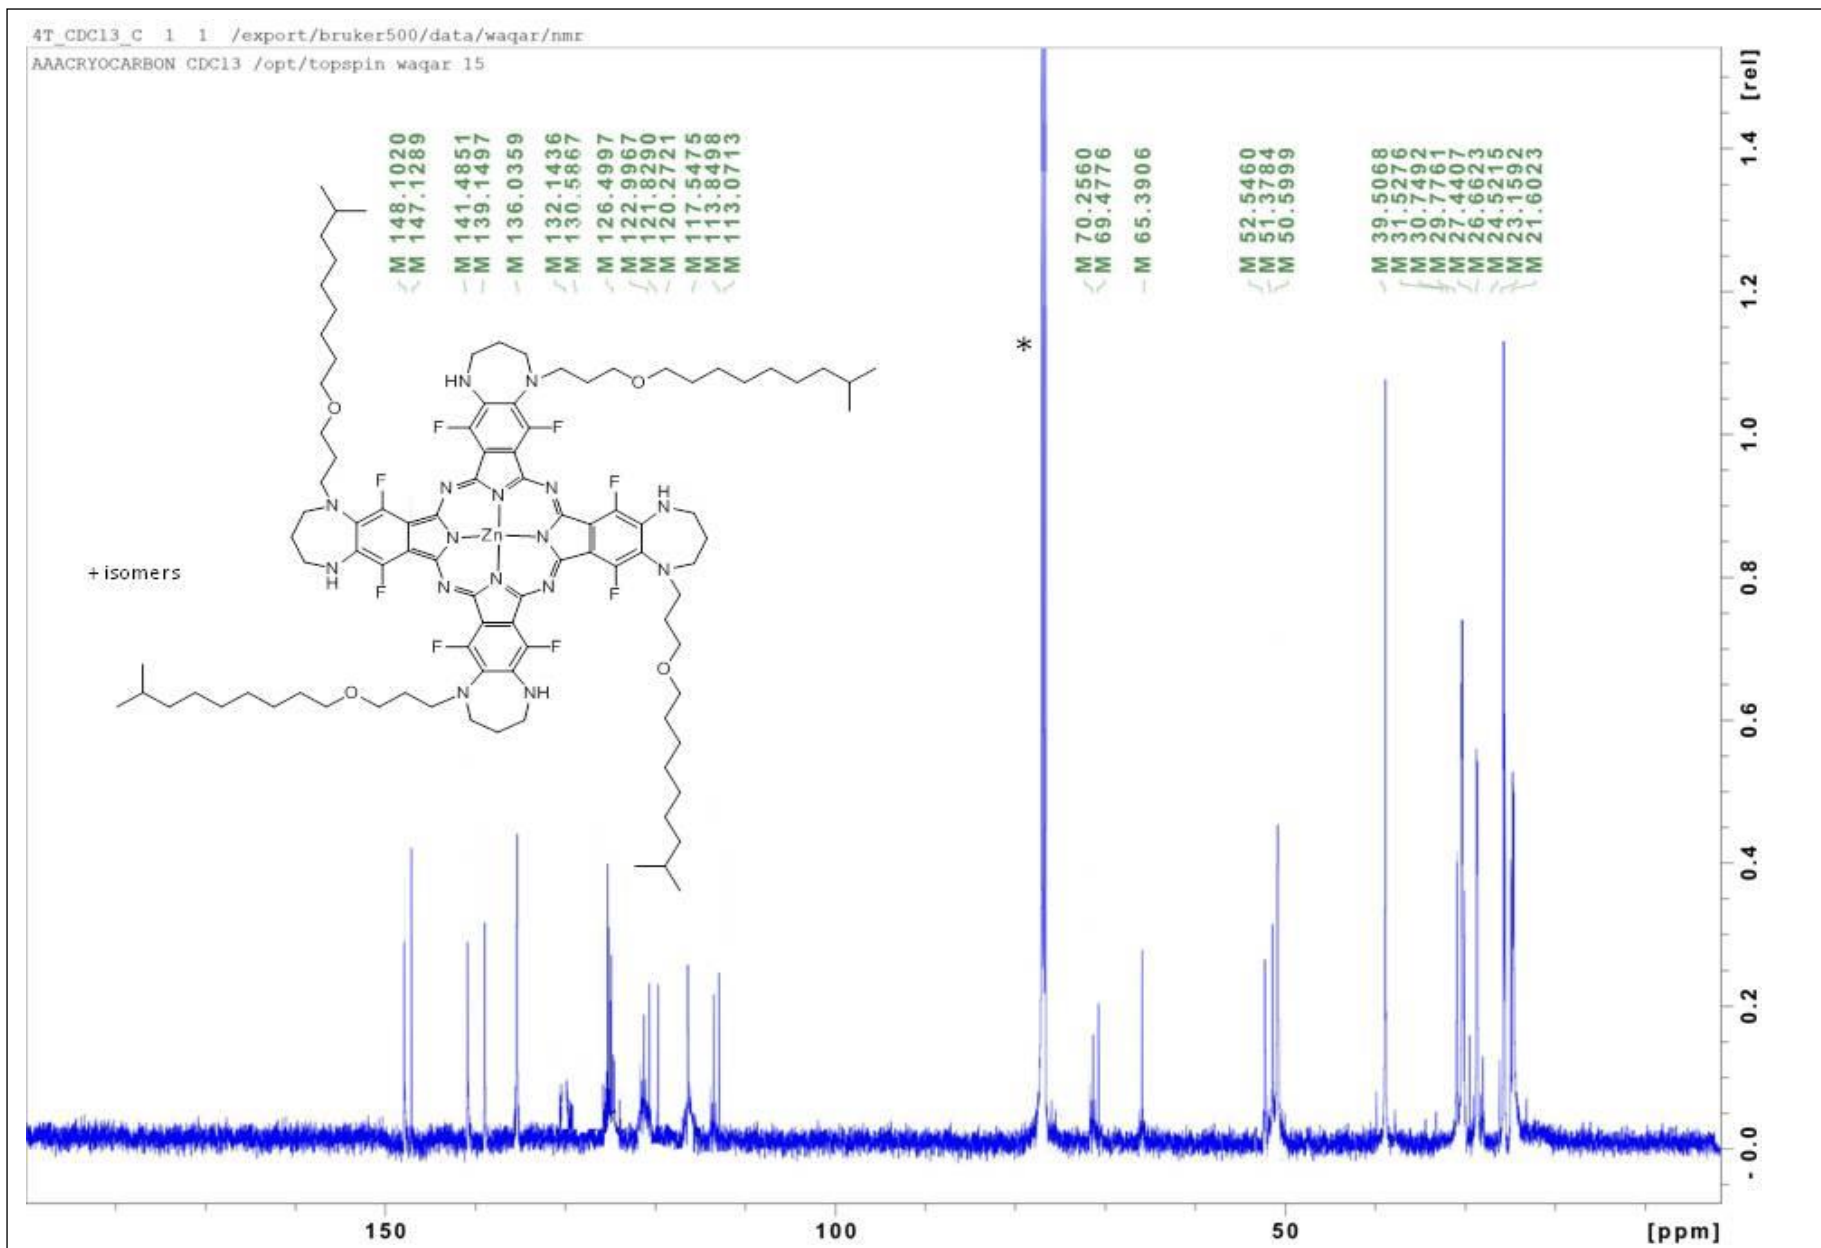

**Figure S8** <sup>13</sup>C NMR of ZnPc(tomamine)<sub>4</sub> in CDCl<sub>3</sub>. \* CDCl<sub>3</sub>

1\_F19 1 1 /export/bruker400/data/waqar/nmr

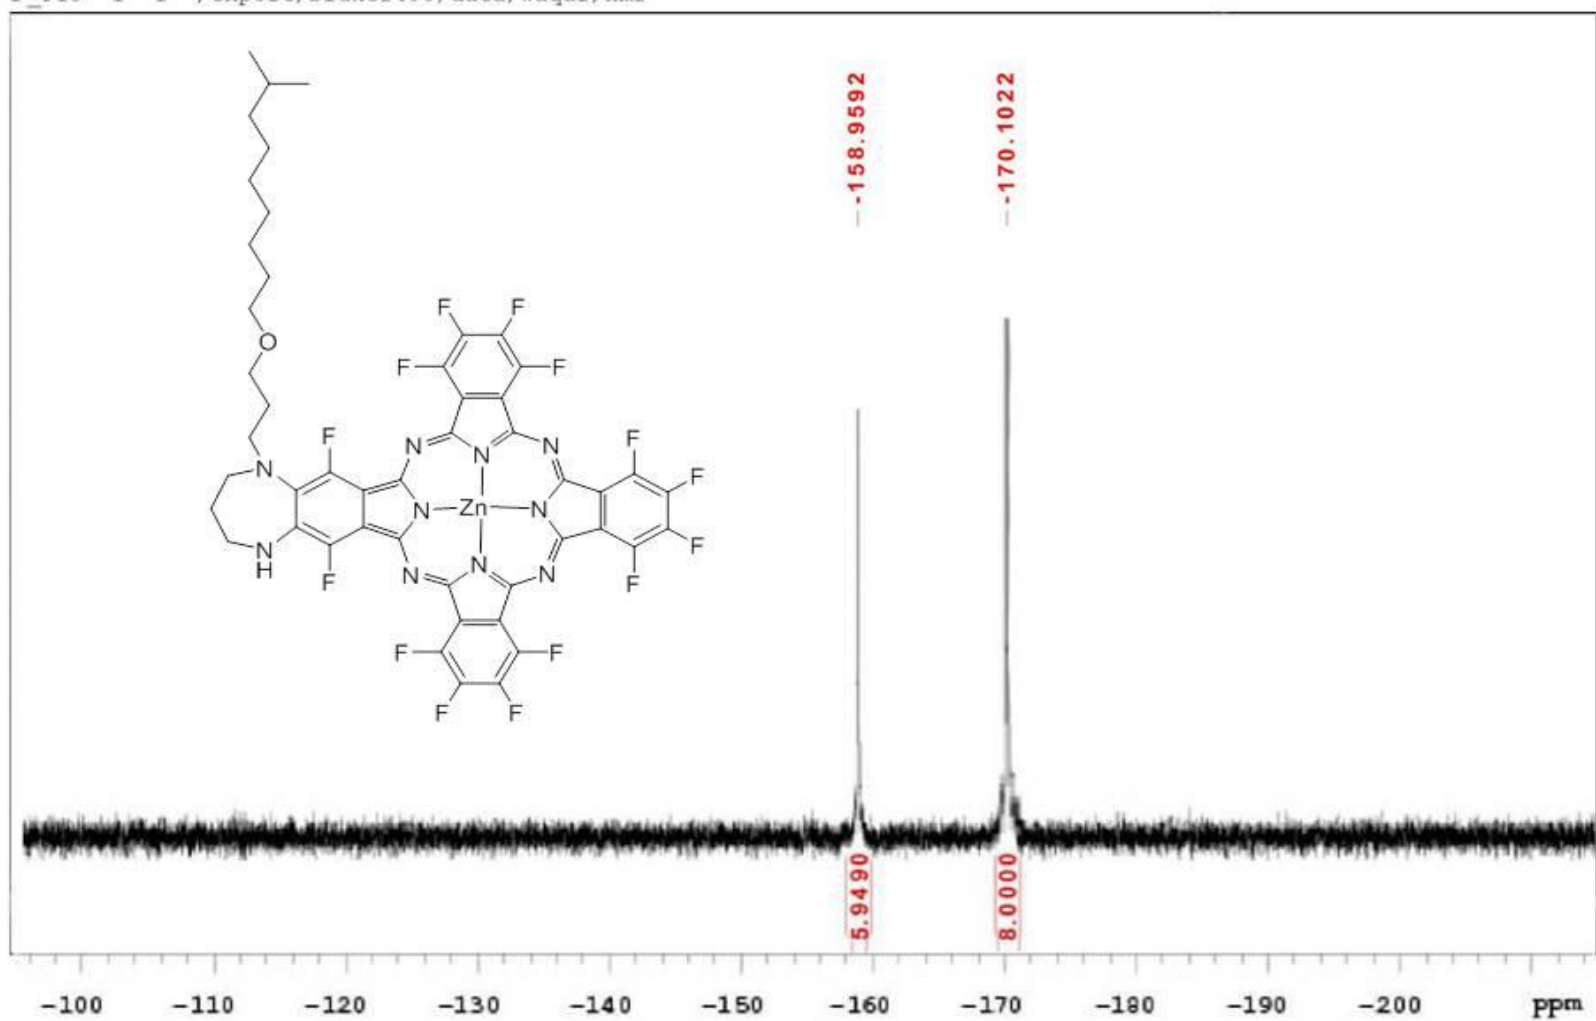

**Figure S9.**  $^{19}\text{F}$  NMR of  $\text{ZnPc}(\text{tomamine})_1$  in  $\text{CDCl}_3$ .

2\_F19 1 1 /export/bruker400/data/waqar/nmr

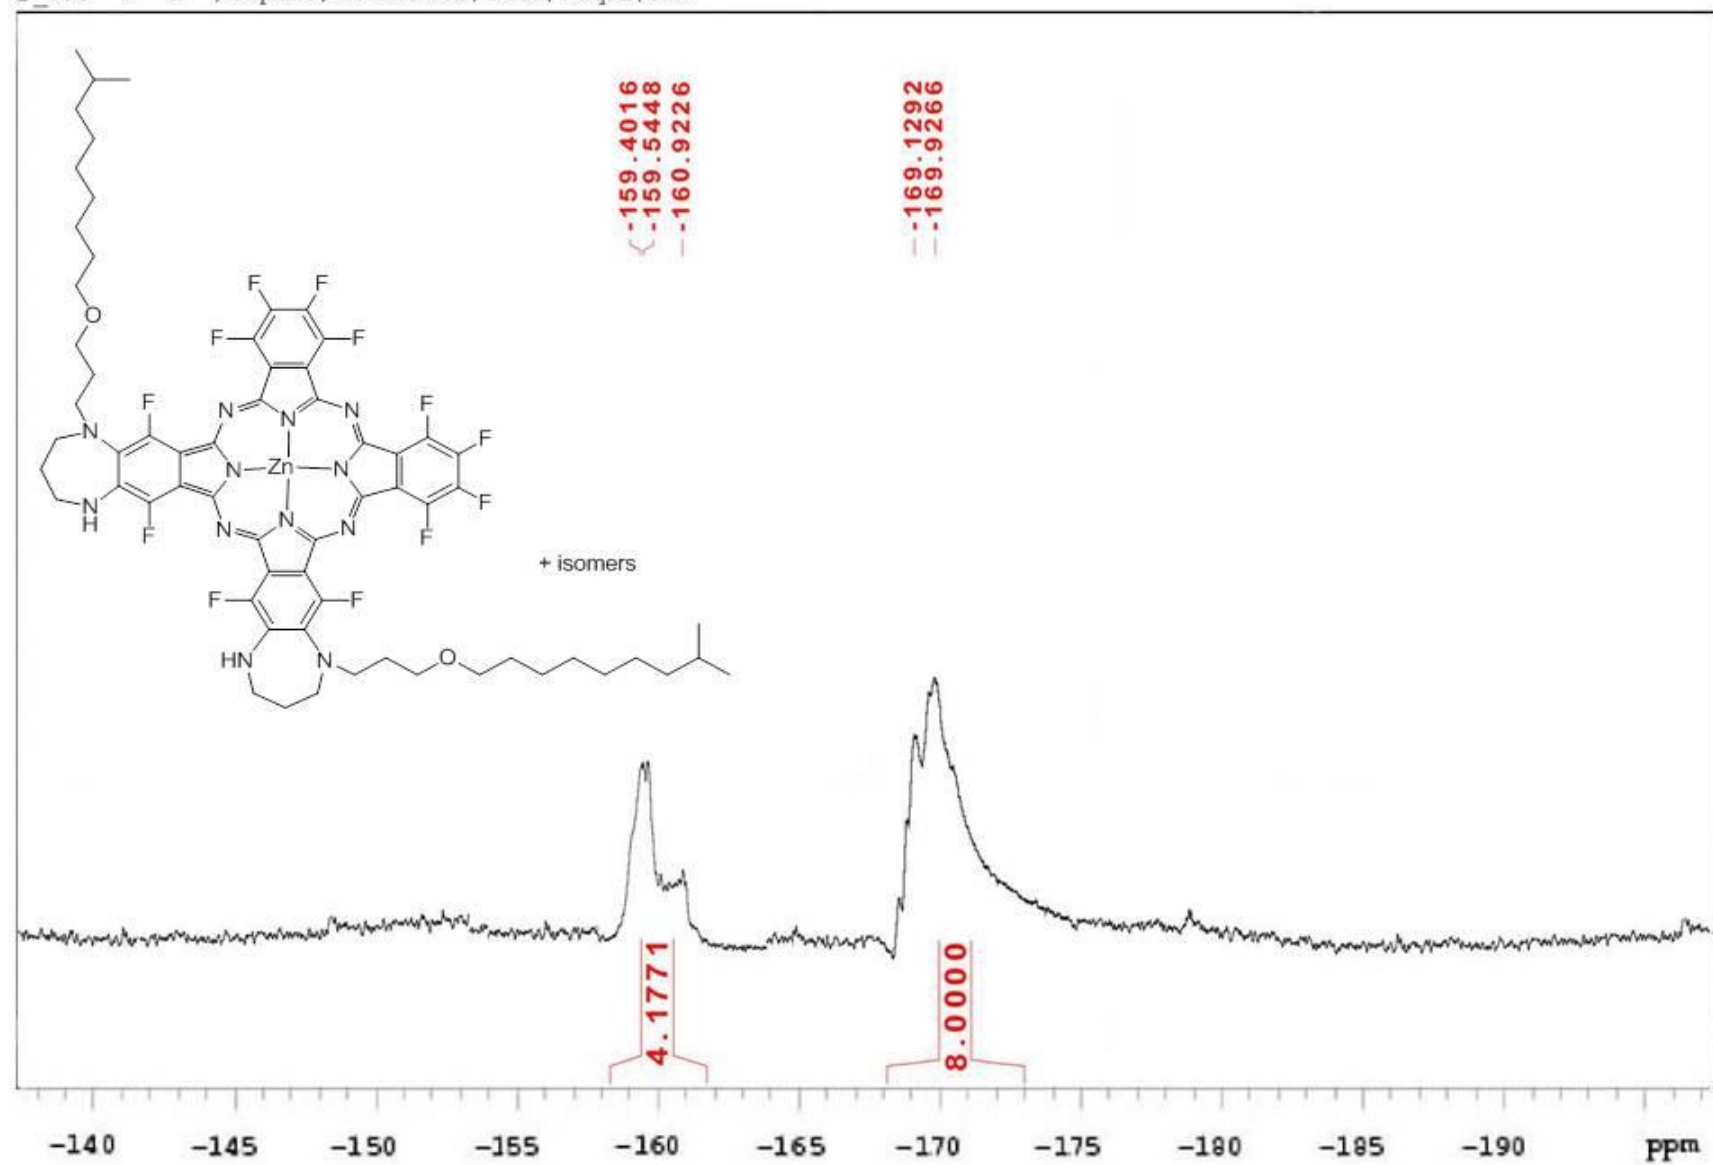

**Figure S10.**  $^{19}\text{F}$  NMR of  $\text{ZnPc}(\text{tomamine})_2$  in  $\text{CDCl}_3$ .

3\_F19 1 1 /export/bruker400/data/waqar/nmr

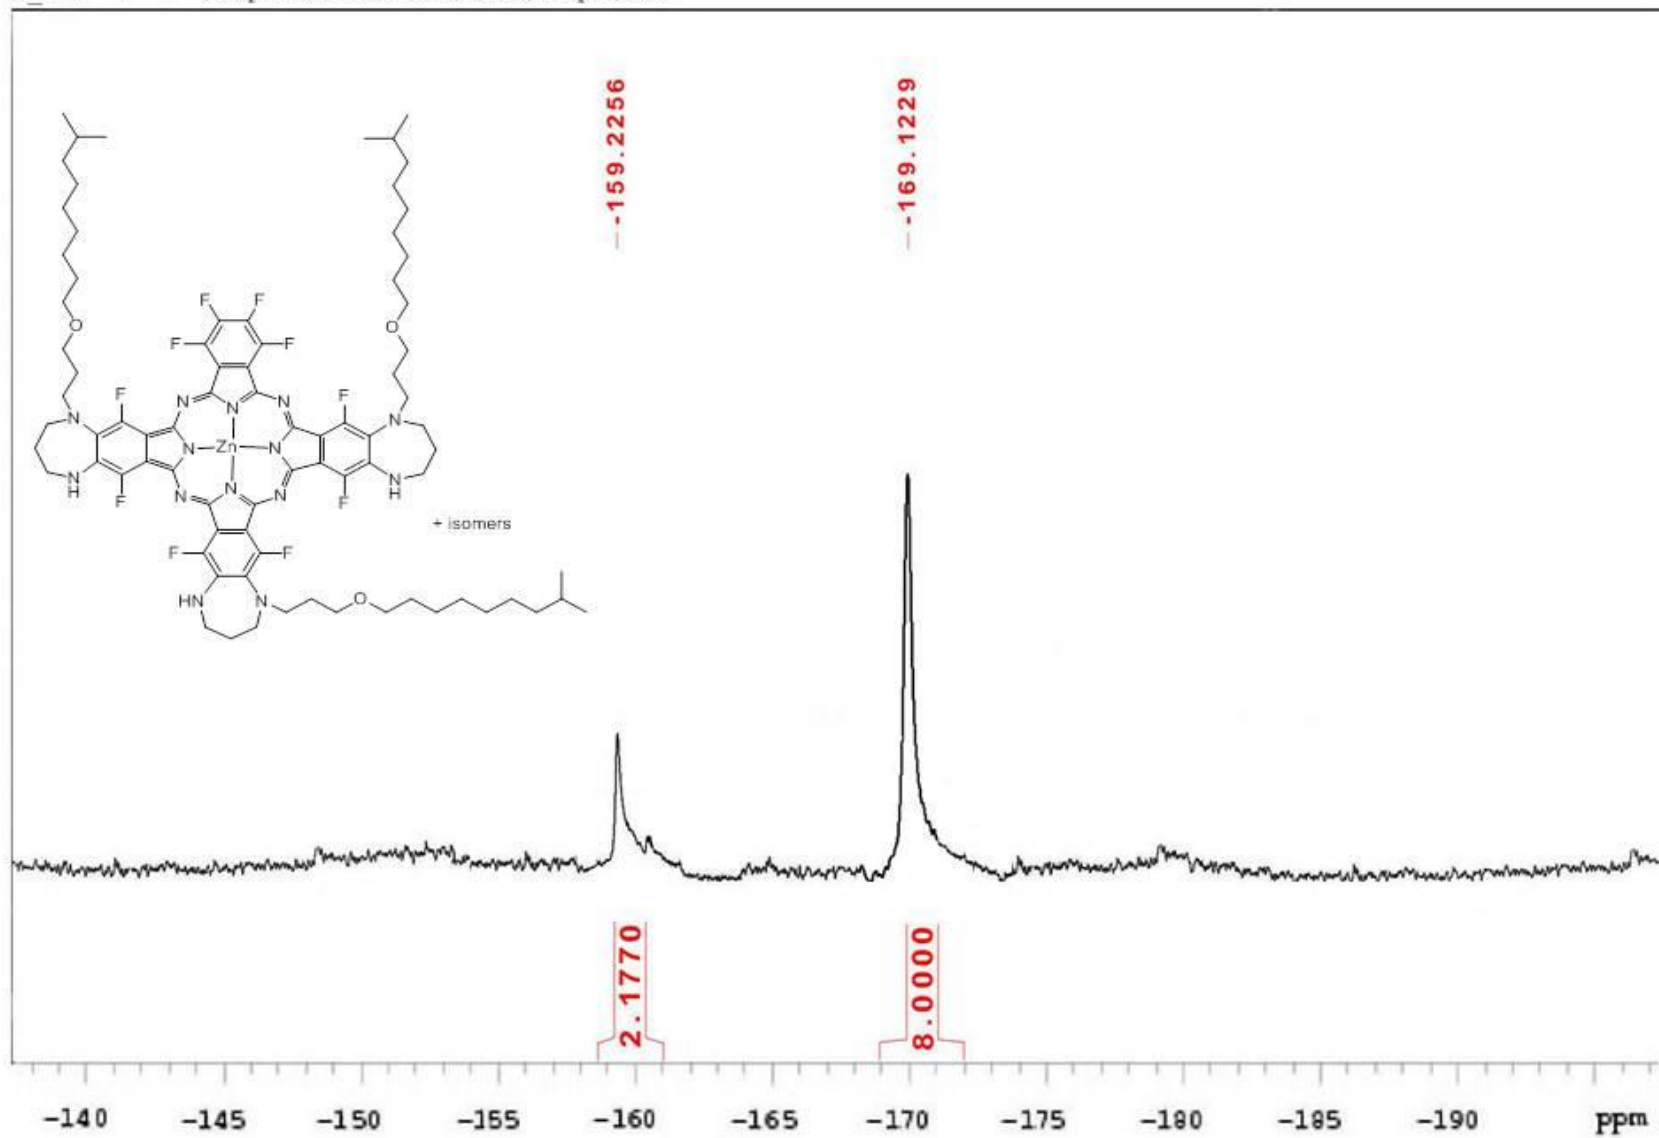

**Figure S11.**  $^{19}\text{F}$  NMR of  $\text{ZnPc}(\text{tomamine})_3$  in  $\text{CDCl}_3$ .

4\_F19 1 1 /export/bruker400/data/waqar/nmr

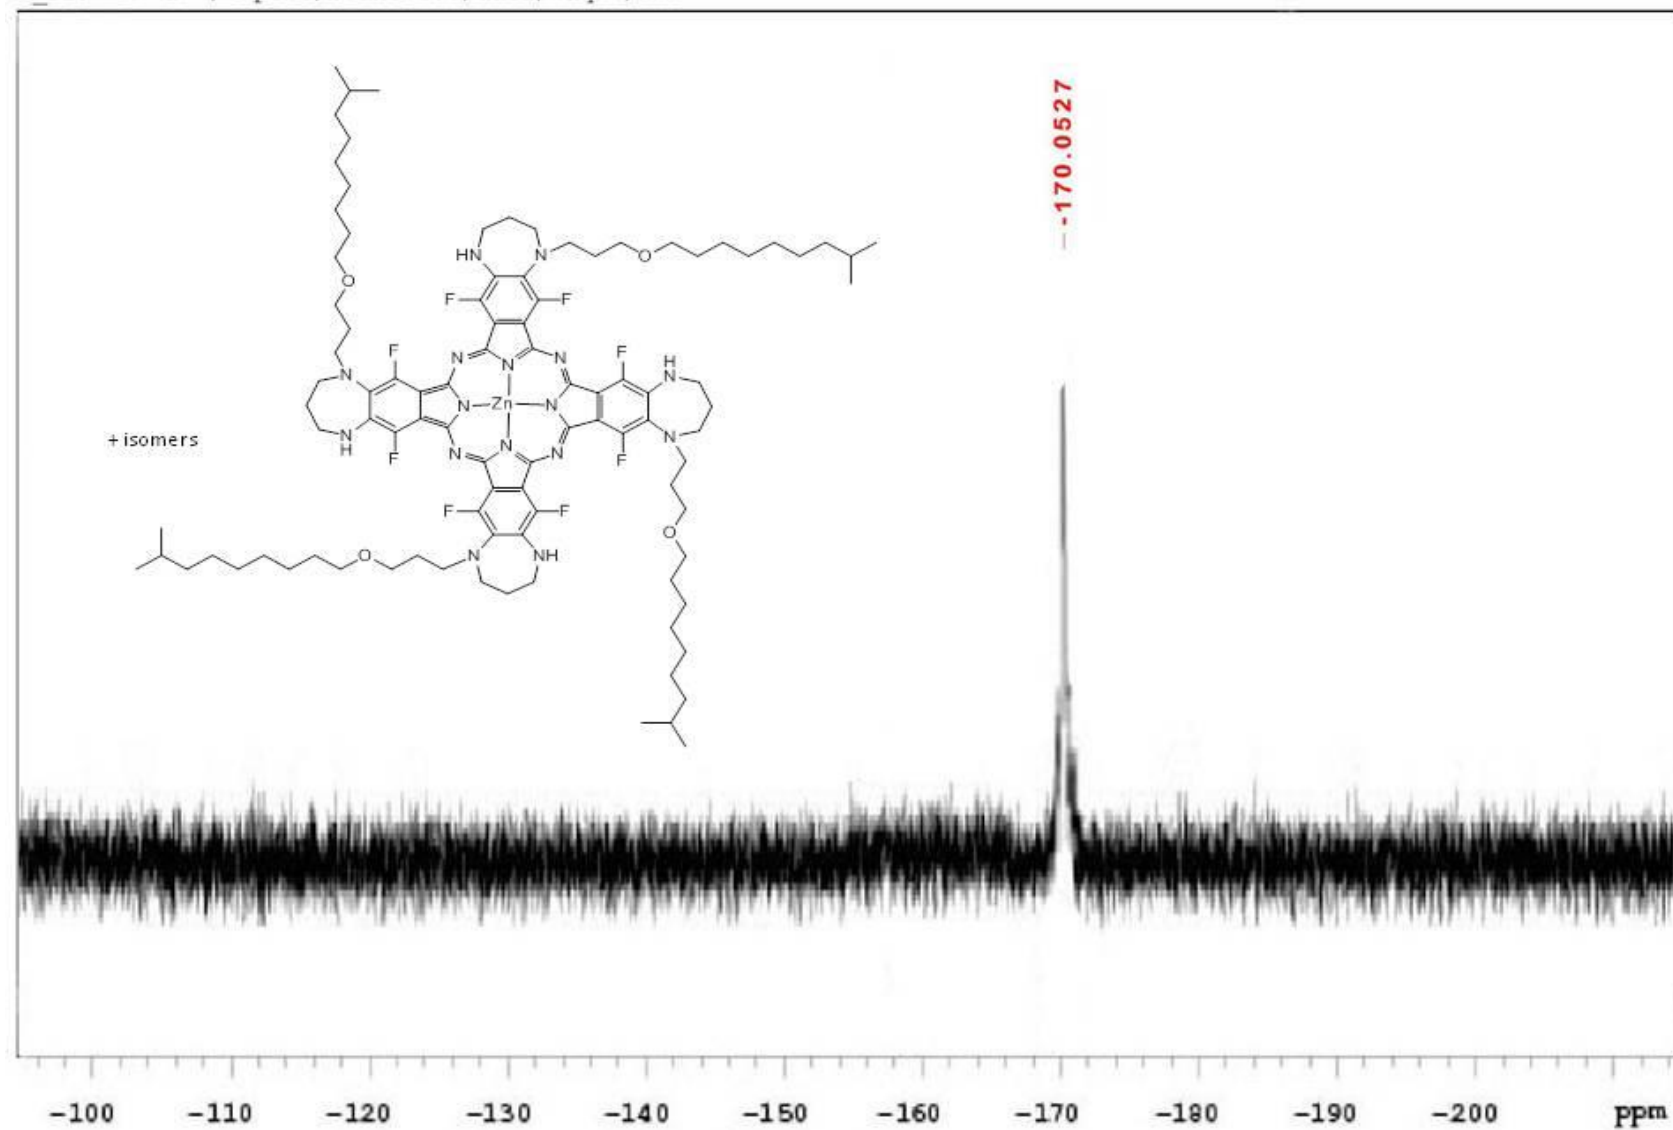

Figure S12.  $^{19}\text{F}$  NMR of  $\text{ZnPc}(\text{tomamine})_4$  in  $\text{CDCl}_3$ .

## Qualitative Compound Report

## Compound Table

| Compound Label                                                                           | RT    | Mass      | Abund | Formula                                                                           | Tgt Mass  | Diff (ppm) | MFG Formula                                                                       | DB Formula                                                                        |
|------------------------------------------------------------------------------------------|-------|-----------|-------|-----------------------------------------------------------------------------------|-----------|------------|-----------------------------------------------------------------------------------|-----------------------------------------------------------------------------------|
| Cpd 1: C <sub>48</sub> H <sub>34</sub> F <sub>14</sub> N <sub>10</sub> O <sub>2</sub> Zn | 0.075 | 1096.1968 | 2239  | C <sub>48</sub> H <sub>34</sub> F <sub>14</sub> N <sub>10</sub> O <sub>2</sub> Zn | 1096.1985 | -1.55      | C <sub>48</sub> H <sub>34</sub> F <sub>14</sub> N <sub>10</sub> O <sub>2</sub> Zn | C <sub>48</sub> H <sub>34</sub> F <sub>14</sub> N <sub>10</sub> O <sub>2</sub> Zn |

| Compound Label                                                                           | m/z       | RT    | Algorithm       | Mass      |
|------------------------------------------------------------------------------------------|-----------|-------|-----------------|-----------|
| Cpd 1: C <sub>48</sub> H <sub>34</sub> F <sub>14</sub> N <sub>10</sub> O <sub>2</sub> Zn | 1097.2058 | 0.075 | Find By Formula | 1096.1968 |

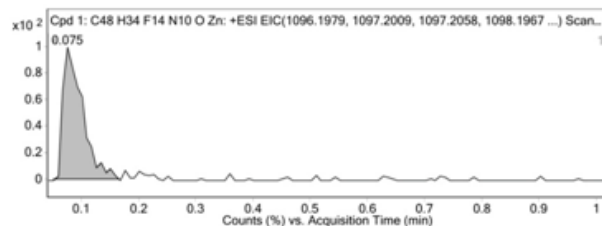

## MS Spectrum

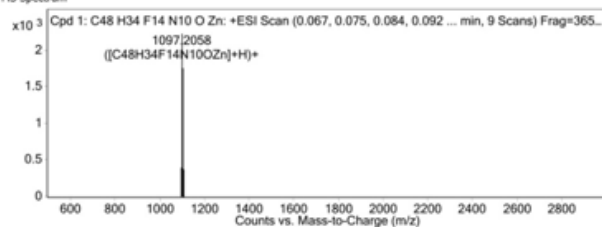

## MS Zoomed Spectrum

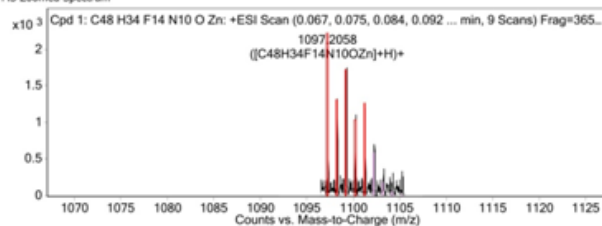

## MS Spectrum Peak List

| m/z       | Calc m/z  | Diff (ppm) | z | Abund   | Formula                                                                           | Ion                |
|-----------|-----------|------------|---|---------|-----------------------------------------------------------------------------------|--------------------|
| 1097.2058 | 1097.2058 | -0.03      | 1 | 2239.48 | C <sub>48</sub> H <sub>34</sub> F <sub>14</sub> N <sub>10</sub> O <sub>2</sub> Zn | (M+H) <sup>+</sup> |
| 1098.2071 | 1098.2087 | 1.52       | 1 | 1340.35 | C <sub>48</sub> H <sub>34</sub> F <sub>14</sub> N <sub>10</sub> O <sub>2</sub> Zn | (M+H) <sup>+</sup> |
| 1099.2023 | 1099.2046 | 2.06       | 1 | 1743.76 | C <sub>48</sub> H <sub>34</sub> F <sub>14</sub> N <sub>10</sub> O <sub>2</sub> Zn | (M+H) <sup>+</sup> |
| 1100.2035 | 1100.2059 | 2.13       | 1 | 1109.29 | C <sub>48</sub> H <sub>34</sub> F <sub>14</sub> N <sub>10</sub> O <sub>2</sub> Zn | (M+H) <sup>+</sup> |
| 1101.1998 | 1101.2033 | 3.14       | 1 | 1245.64 | C <sub>48</sub> H <sub>34</sub> F <sub>14</sub> N <sub>10</sub> O <sub>2</sub> Zn | (M+H) <sup>+</sup> |

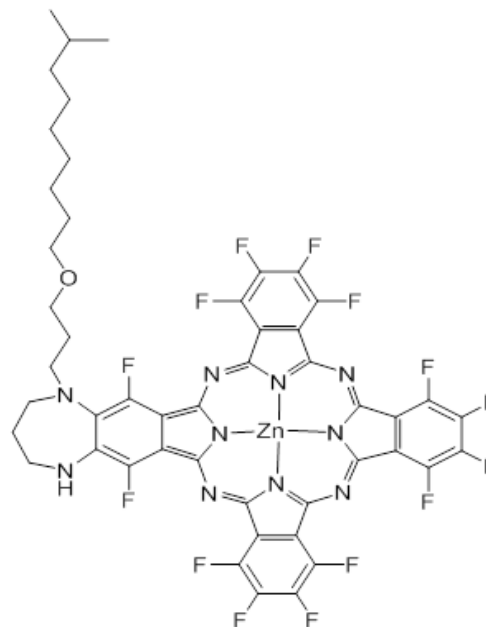

Figure S13. High resolution mass spectrum of compound ZnPc(tomamine)<sub>1</sub>.

## Qualitative Compound Report

### Compound Table

| Compound Label               | RT    | Mass      | Abund | Formula               | Tgt Mass  | Diff (ppm) | MFG Formula           | DB Formula            |
|------------------------------|-------|-----------|-------|-----------------------|-----------|------------|-----------------------|-----------------------|
| Cpd 1: C64 H68 F12 N12 O2 Zn | 0.075 | 1328.4672 | 4947  | C64 H68 F12 N12 O2 Zn | 1328.4668 | -1.18      | C64 H68 F12 N12 O2 Zn | C64 H68 F12 N12 O2 Zn |

| Compound Label               | m/z       | RT    | Algorithm       | Mass      |
|------------------------------|-----------|-------|-----------------|-----------|
| Cpd 1: C64 H68 F12 N12 O2 Zn | 1329.4748 | 0.075 | Find By Formula | 1328.4672 |

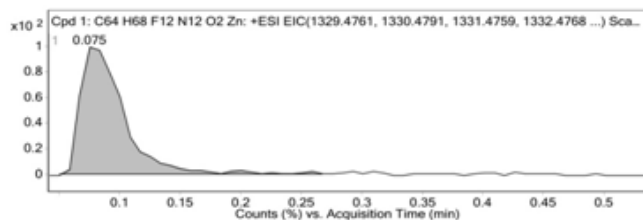

### MS Spectrum

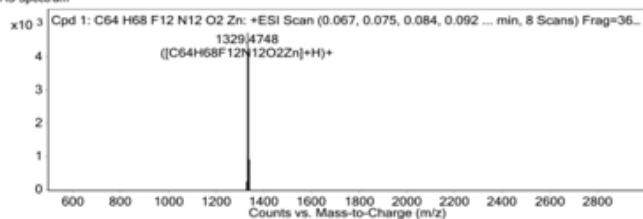

### MS Zoomed Spectrum

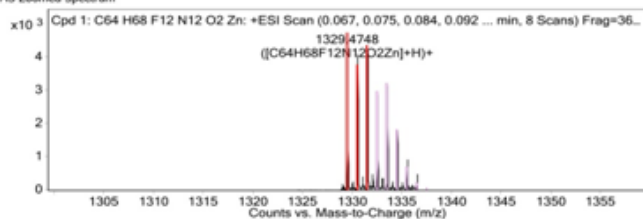

### MS Spectrum Peak List

| m/z       | Calc m/z  | Diff(ppm) | z | Abund   | Formula          | Ion      |
|-----------|-----------|-----------|---|---------|------------------|----------|
| 1329.4748 | 1329.4761 | 0.99      | 1 | 4947.38 | C64H68F12N12O2Zn | [(M+H)+] |
| 1330.4775 | 1330.4791 | 1.23      | 1 | 4168.3  | C64H68F12N12O2Zn | [(M+H)+] |
| 1331.4741 | 1331.4759 | 1.34      | 1 | 4163.32 | C64H68F12N12O2Zn | [(M+H)+] |

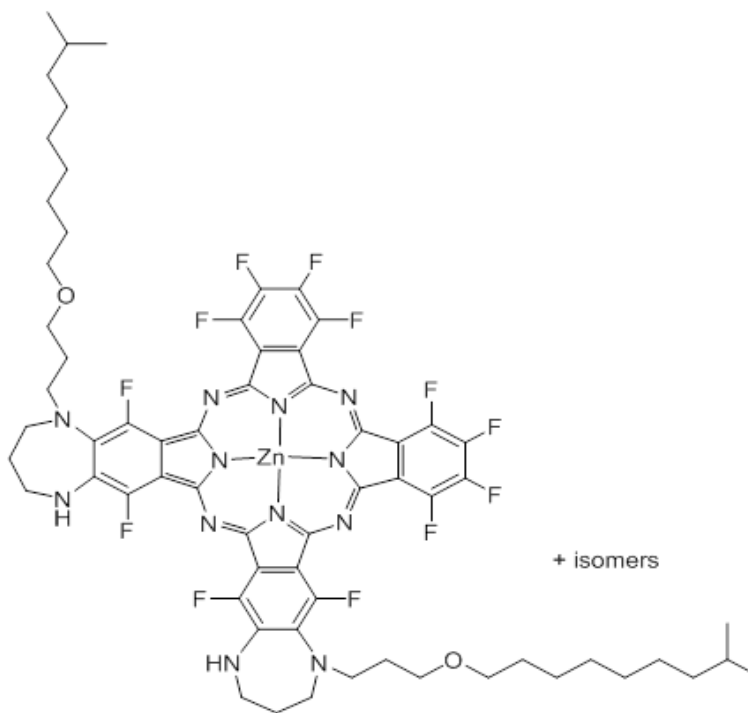

**Figure S14.** High resolution mass spectrum of compound ZnPc(tomamine)<sub>2</sub>.



## Qualitative Compound Report

### Compound Table

| Compound Label                      | RT    | Mass      | Abund | Formula                | Tgt Mass  | Diff (ppm) | MFG Formula            | DB Formula             |
|-------------------------------------|-------|-----------|-------|------------------------|-----------|------------|------------------------|------------------------|
| Cpd 1: C80 H102 F10 N14 O3 Zn<br>Zn | 0.092 | 1560.7418 | 24031 | C80 H102 F10 N14 O3 Zn | 1560.7391 | 1.74       | C80 H102 F10 N14 O3 Zn | C80 H102 F10 N14 O3 Zn |

| Compound Label                | m/z       | RT    | Algorithm       | Mass      |
|-------------------------------|-----------|-------|-----------------|-----------|
| Cpd 1: C80 H102 F10 N14 O3 Zn | 1563.7464 | 0.092 | Find By Formula | 1560.7418 |

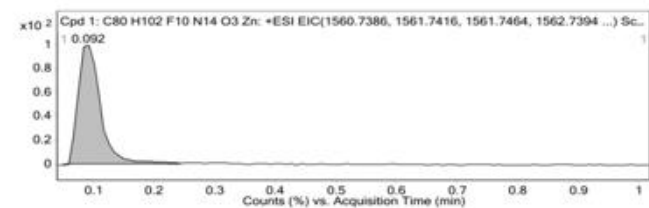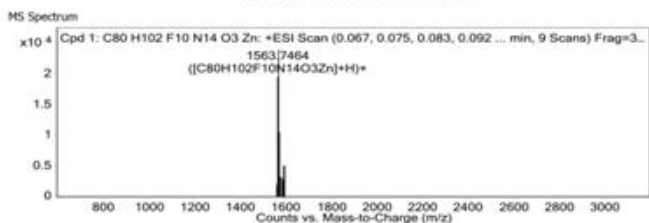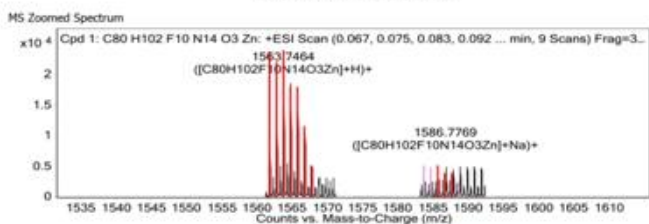

### MS Spectrum Peak List

| m/z       | Calc m/z  | Diff(ppm) | z | Abund    | Formula           | Ion     |
|-----------|-----------|-----------|---|----------|-------------------|---------|
| 1561.7447 | 1561.7464 | 1.1       | 1 | 20378.73 | C80H102F10N14O3Zn | (M+H)+  |
| 1562.7475 | 1562.7494 | 1.21      | 1 | 22566.97 | C80H102F10N14O3Zn | (M+H)+  |
| 1563.7464 | 1563.7472 | 0.54      | 1 | 24030.79 | C80H102F10N14O3Zn | (M+H)+  |
| 1564.7465 | 1564.7477 | 0.8       | 1 | 19062.35 | C80H102F10N14O3Zn | (M+H)+  |
| 1565.7441 | 1565.7457 | 1.06      | 1 | 16620.76 | C80H102F10N14O3Zn | (M+H)+  |
| 1566.7441 | 1566.7469 | 1.77      | 1 | 10721.53 | C80H102F10N14O3Zn | (M+H)+  |
| 1567.7427 | 1567.7488 | 3.86      | 1 | 5287.1   | C80H102F10N14O3Zn | (M+H)+  |
| 1585.7556 | 1585.7291 | -16.69    | 1 | 3007.11  | C80H102F10N14O3Zn | (M+Na)+ |
| 1586.7769 | 1586.7297 | -29.8     | 1 | 5134.8   | C80H102F10N14O3Zn | (M+Na)+ |
| 1587.7801 | 1587.7277 | -33.04    | 1 | 4672.13  | C80H102F10N14O3Zn | (M+Na)+ |

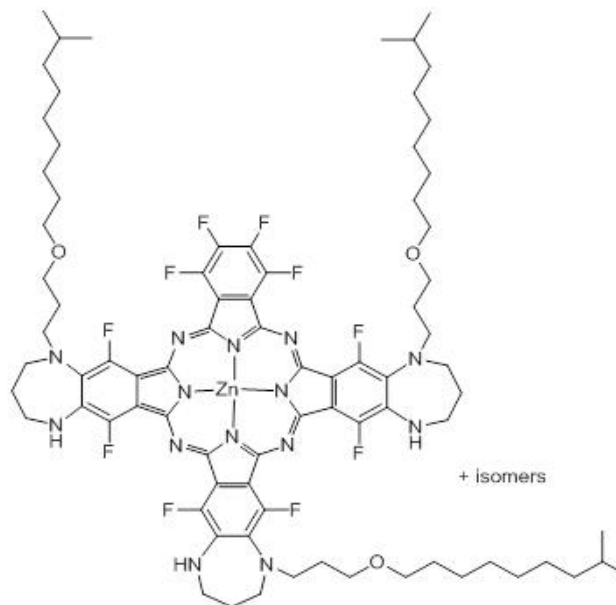

**Figure S15.** High resolution mass spectrum of compound ZnPc(tomamine)<sub>3</sub>.

## Qualitative Compound Report

### Compound Table

| Compound Label               | RT    | Mass      | Abund | Formula               | Tgt Mass  | Diff (ppm) | MFG Formula           | DB Formula            |
|------------------------------|-------|-----------|-------|-----------------------|-----------|------------|-----------------------|-----------------------|
| Cpd 1: C96 H136 F8 N16 O4 Zn | 0.081 | 1792.9961 | 2157  | C96 H136 F8 N16 O4 Zn | 1793.0094 | -7.42      | C96 H136 F8 N16 O4 Zn | C96 H136 F8 N16 O4 Zn |

| Compound Label               | m/z       | RT    | Algorithm       | Mass      |
|------------------------------|-----------|-------|-----------------|-----------|
| Cpd 1: C96 H136 F8 N16 O4 Zn | 1818.0035 | 0.081 | Find By Formula | 1792.9961 |

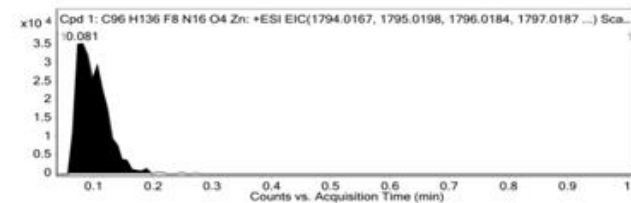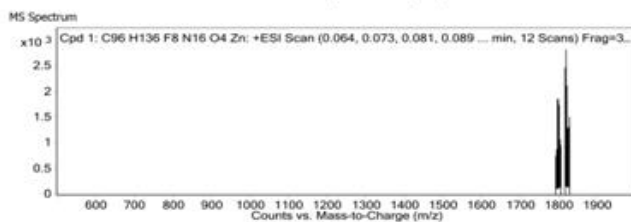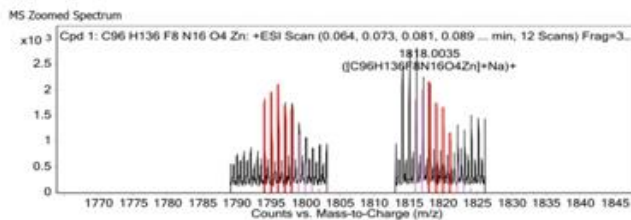

### MS Spectrum Peak List

| m/z       | Calc m/z  | Diff(ppm) | z | Abund   | Formula          | Ion     |
|-----------|-----------|-----------|---|---------|------------------|---------|
| 1793.991  | 1794.0167 | 14.33     | 1 | 1813.94 | C96H136F8N16O4Zn | (M+H)+  |
| 1794.9966 | 1795.0198 | 12.88     | 1 | 1844.15 | C96H136F8N16O4Zn | (M+H)+  |
| 1795.9958 | 1796.0184 | 12.59     | 1 | 1878.71 | C96H136F8N16O4Zn | (M+H)+  |
| 1796.9944 | 1797.0187 | 13.53     | 1 | 1780.11 | C96H136F8N16O4Zn | (M+H)+  |
| 1797.992  | 1798.017  | 13.9      | 1 | 1768.46 | C96H136F8N16O4Zn | (M+H)+  |
| 1818.0035 | 1818.0003 | -1.78     | 1 | 2157.11 | C96H136F8N16O4Zn | (M+Na)+ |
| 1819.0056 | 1819.0006 | -2.73     | 1 | 1719.79 | C96H136F8N16O4Zn | (M+Na)+ |
| 1819.9997 | 1819.9989 | -0.41     | 1 | 1327.19 | C96H136F8N16O4Zn | (M+Na)+ |
| 1820.9997 | 1820.9997 | 0.01      | 1 | 938.65  | C96H136F8N16O4Zn | (M+Na)+ |

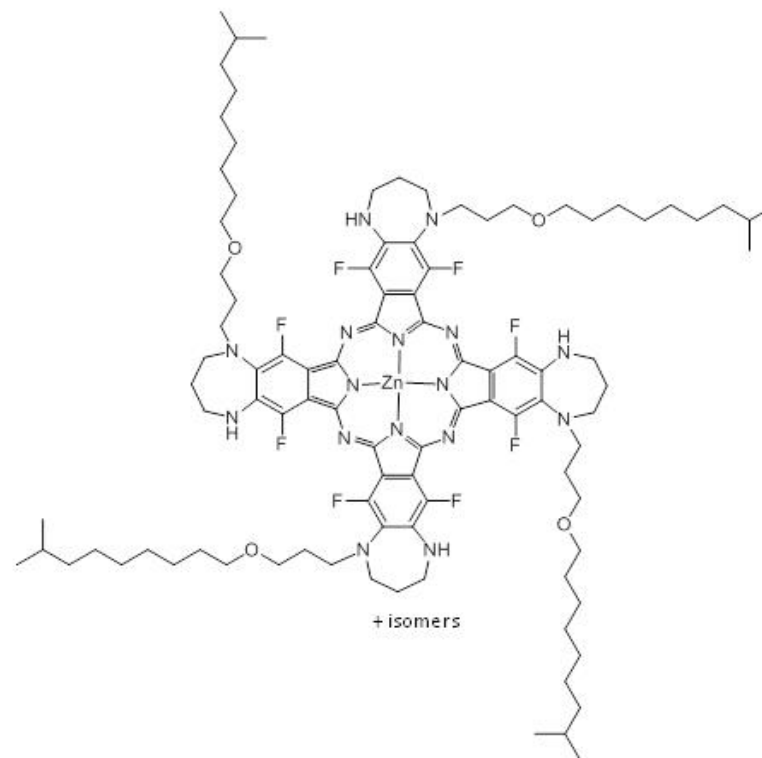

**Figure S16.** High resolution mass spectrum of compound ZnPc(tomamine)<sub>4</sub>.

## Solvent Dependence

| Compound                    | Solvent | Dipole moment <sup>a</sup> | Dielectric constant <sup>a</sup> | UV-visible Absorption $\lambda_{\max}(\log \epsilon)$ | $^1\text{O}_2 \Phi_{\Delta}$ <sup>b</sup> | Aggr. Size (nm) |
|-----------------------------|---------|----------------------------|----------------------------------|-------------------------------------------------------|-------------------------------------------|-----------------|
| ZnPc(tomamine) <sub>1</sub> | Acetone | 2.9 D                      | 20.6                             | 347, 674, 745 (3.51)                                  | 0.019                                     | 53              |
|                             | DCM     | 1.8 D                      | 9.1                              | 348, 690, 747 (3.38)                                  | -                                         | -               |
|                             | MeOH    | 1.7 D                      | 32.6                             | 347, 700, 754 (2.74)                                  | -                                         | -               |
|                             | PBS     | 1.87 D                     | 79.7                             | 348, 690, 755 (2.65)                                  | -                                         | 89              |
|                             | THF     | 1.75 D                     | 7.6                              | 348, 656, 754 (3.70)                                  | -                                         | -               |
|                             | DMSO    | 3.96 D                     | 46.6                             | 347, 700, 774 (3.60)                                  | -                                         | -               |
| ZnPc(tomamine) <sub>2</sub> | Acetone |                            |                                  | 348, 730, 768 (3.45)                                  | 0.009                                     | 69              |
|                             | DCM     |                            |                                  | 349, 732, 770 (3.38)                                  | -                                         | -               |
|                             | MeOH    |                            |                                  | 348, 710, 795 (2.57)                                  | -                                         | -               |
|                             | PBS     |                            |                                  | 349, 730, 768 (2.49)                                  | -                                         | 133             |
|                             | THF     |                            |                                  | 349, 731, 767 (3.62)                                  | -                                         | -               |
|                             | DMSO    |                            |                                  | 348, 735, 810 (3.49)                                  | -                                         | -               |
| ZnPc(tomamine) <sub>3</sub> | Acetone |                            |                                  | 350, 690, 778 (3.39)                                  | 0.016                                     | 98              |
|                             | DCM     |                            |                                  | 351, 702, 784 (3.41)                                  | -                                         | -               |
|                             | MeOH    |                            |                                  | 350, 710, 786 (2.50)                                  | -                                         | -               |
|                             | PBS     |                            |                                  | 350, 705, 790 (2.39)                                  | -                                         | 193             |
|                             | THF     |                            |                                  | 351, 702, 787 (3.54)                                  | -                                         | -               |
|                             | DMSO    |                            |                                  | 350, 715, 805 (3.38)                                  | -                                         | -               |
| ZnPc(tomamine) <sub>4</sub> | Acetone |                            |                                  | 354, 702, 795 (3.42)                                  | 0.004                                     | 122             |
|                             | DCM     |                            |                                  | 355, 716, 809 (3.36)                                  | -                                         | -               |
|                             | MeOH    |                            |                                  | 354, 725, 805 (2.43)                                  | -                                         | -               |
|                             | PBS     |                            |                                  | 355, 710, 802 (2.21)                                  | -                                         | 223             |
|                             | THF     |                            |                                  | 355, 708, 804 (3.56)                                  | -                                         | -               |
|                             | DMSO    |                            |                                  | 355, 726, 820 (3.25)                                  | -                                         | -               |

**Table S3.** Solvent dependence of UV-visible,  $^1\text{O}_2 \Phi_{\Delta}$  and aggregation of ZnPc(tomamine)<sub>1</sub>, ZnPc(tomamine)<sub>2</sub>, ZnPc(tomamine)<sub>3</sub>, and ZnPc(tomamine)<sub>4</sub>. UV-visible spectra are given below.

<sup>a</sup> Handbook of solvent properties,<sup>[1]</sup> <sup>b</sup> acetone-d<sub>6</sub>

Note: aggregation of these dyes is solvent and concentration dependent, thus for all spectra and experiments concentrations were chosen to avoid aggregation of the dyes.

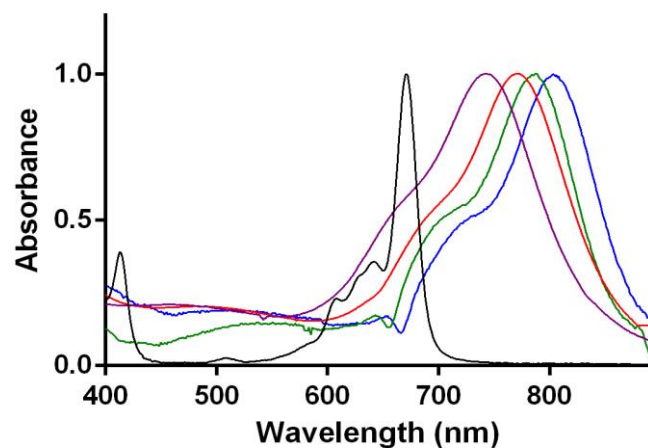

**Figure S17.** UV-visible absorbance spectra of compounds ZnF<sub>16</sub>Pc (black), ZnPc(tomamine)<sub>1</sub> (pink), ZnPc(tomamine)<sub>2</sub> (red), ZnPc(tomamine)<sub>3</sub> (green) and ZnPc(tomamine)<sub>4</sub> (blue) in THF.

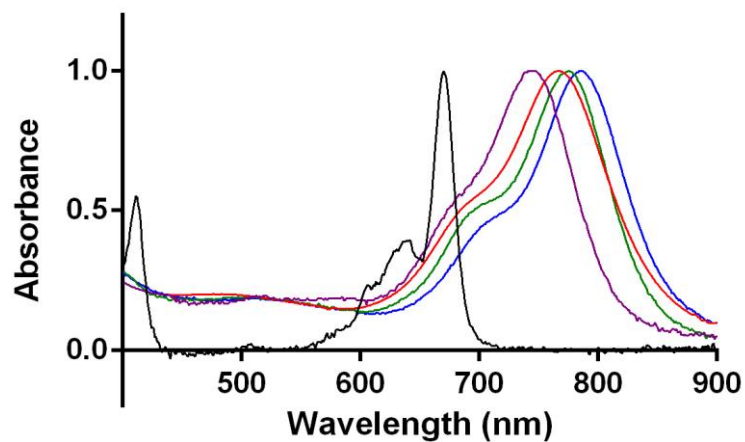

**Figure S18.** UV-visible absorbance spectra of compounds ZnF<sub>16</sub>Pc (black), ZnPc(tomamine)<sub>1</sub> (pink), ZnPc(tomamine)<sub>2</sub> (red), ZnPc(tomamine)<sub>3</sub> (green) and ZnPc(tomamine)<sub>4</sub> (blue) in acetone.

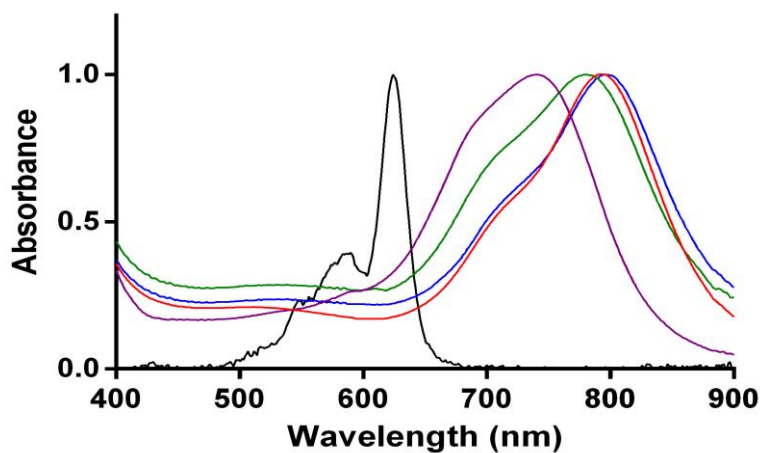

**Figure S19.** UV-visible absorbance spectra of compounds ZnF<sub>16</sub>Pc (black), ZnPc(tomamine)<sub>1</sub> (pink), ZnPc(tomamine)<sub>2</sub> (red), ZnPc(tomamine)<sub>3</sub> (green) and ZnPc(tomamine)<sub>4</sub> (blue) in CH<sub>2</sub>Cl<sub>2</sub>.

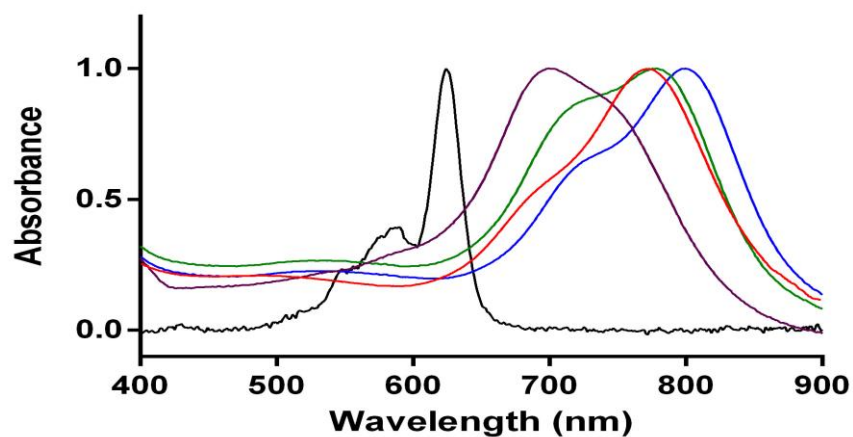

**Figure S20.** UV-visible absorbance spectra of compounds ZnF<sub>16</sub>Pc (black), ZnPc(tomamine)<sub>1</sub> (pink), ZnPc(tomamine)<sub>2</sub> (red), ZnPc(tomamine)<sub>3</sub> (green) and ZnPc(tomamine)<sub>4</sub> (blue) in MeOH.

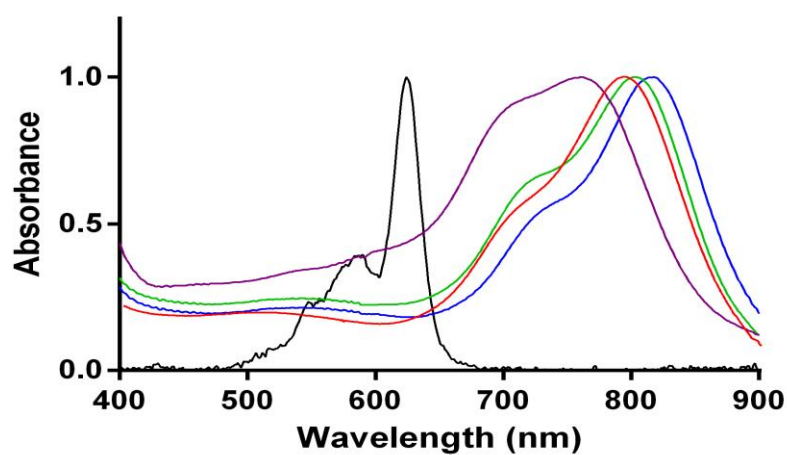

**Figure S21.** UV-visible absorbance spectra of compounds ZnF<sub>16</sub>Pc (black), ZnPc(tomamine)<sub>1</sub> (pink), ZnPc(tomamine)<sub>2</sub> (red), ZnPc(tomamine)<sub>3</sub> (green) and ZnPc(tomamine)<sub>4</sub> (blue) in DMSO.

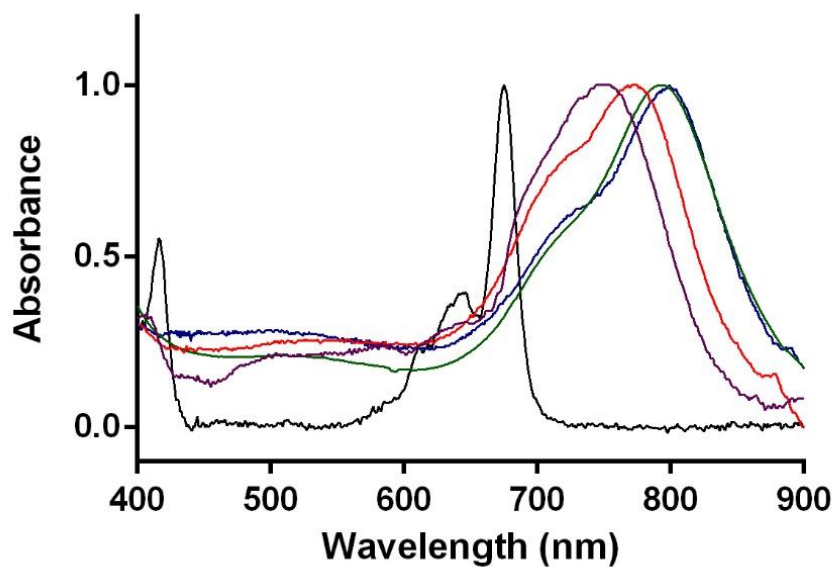

**Figure S22.** UV-visible absorbance spectra of compounds ZnF<sub>16</sub>Pc (black), ZnPc(tomamine)<sub>1</sub> (pink), ZnPc(tomamine)<sub>2</sub> (red), ZnPc(tomamine)<sub>3</sub> (green) and ZnPc(tomamine)<sub>4</sub> (blue) in PBS.

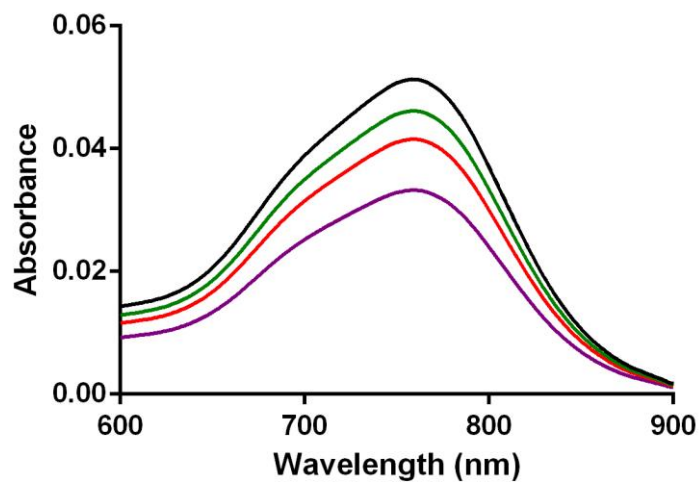

**Figure S23.** Photostability study of ZnPc(tomamine)<sub>1</sub>. UV-visible absorbance spectra taken using 1 cm glass cuvette in acetone at time = 0 h (black), 2 h (green), 4 h (red) and 8 h (purple). Exposed under direct 13 W white light bulb at 0.41 mW/cm<sup>2</sup>.

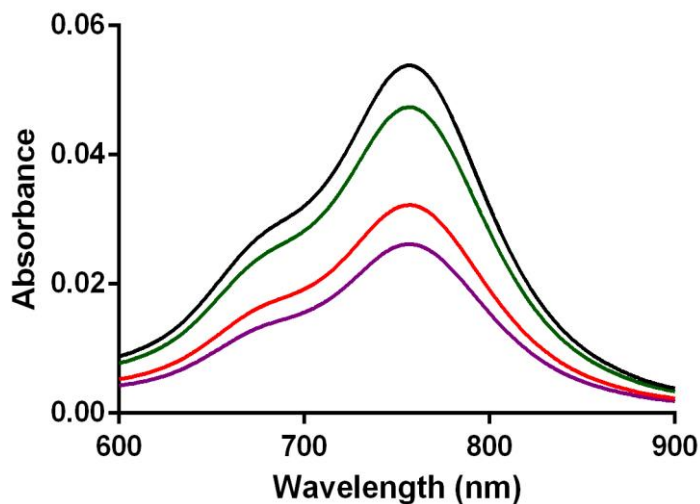

**Figure S24.** Photostability study of compound ZnPc(tomamine)<sub>2</sub>. UV-visible absorbance spectra taken using 1 cm glass cuvette in acetone at time = 0 h (black), 2 h (green), 4 h (red) and 8 h (purple). Exposed under direct 13 W white light bulb at 0.41 mW/cm<sup>2</sup>.

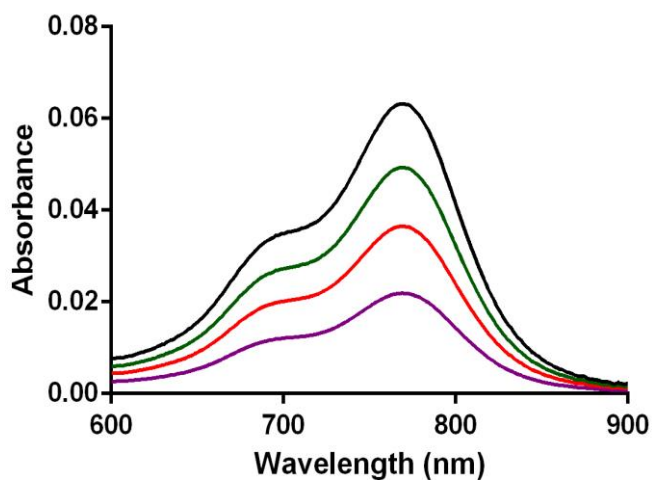

**Figure S25.** Photostability study of compound ZnPc(tomamine)<sub>3</sub>. UV-visible absorbance spectra taken using 1 cm glass cuvette in acetone at time = 0 h (black), 2 h (green), 4 h (red) and 8 h (purple). Exposed under direct 13 W white light bulb at 0.41 mW/cm<sup>2</sup>.

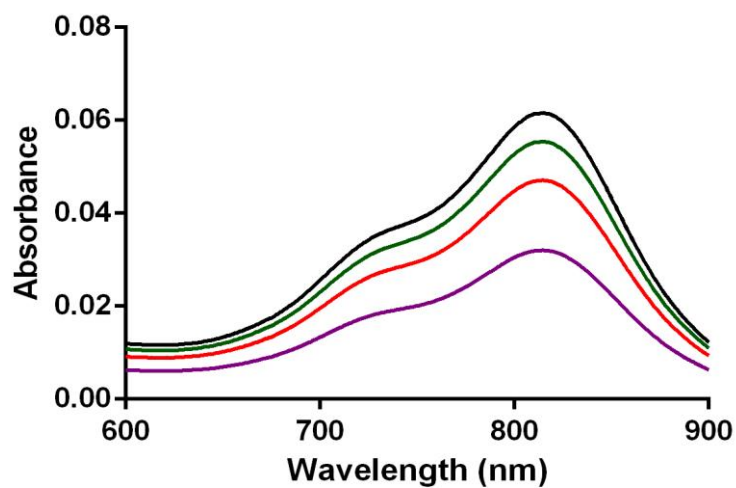

**Figure S26.** Photostability study of compound ZnPc(tomamine)<sub>4</sub>. UV-visible absorbance spectra taken using 1 cm glass cuvette in acetone at time = 0 h (black), 2 h (green), 4 h (red) and 8 h (purple). Exposed under direct 13 W white fluorescent lamp at 0.41 mW/cm<sup>2</sup>.



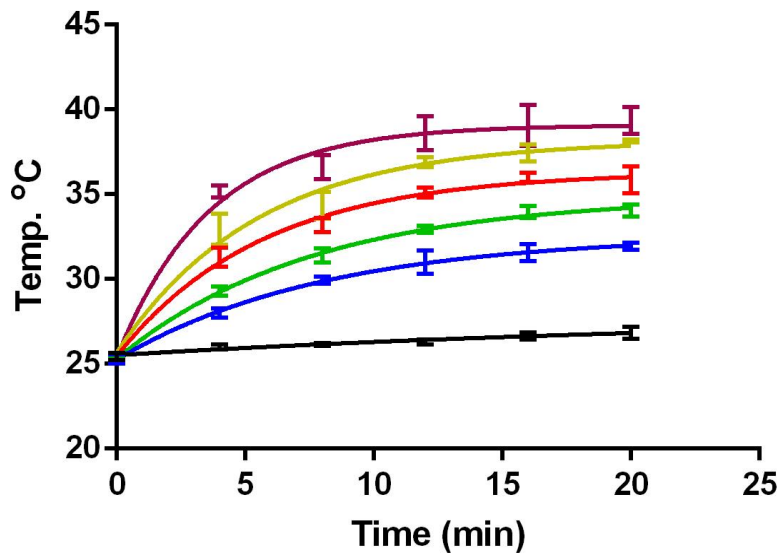

**Figure S27.** Photothermal study of ZnPc(tomamine)<sub>1</sub>. Temperature taken using a digital thermometer of 0 μM (black), 20 μM (blue), 40 μM (green), 60 μM (red), 80 μM (yellow) and 100 μM (purple) of 1.5 mL solutions in PBS. Exposed under direct 13 W white fluorescent lamp at 0.92 mW/cm<sup>2</sup>.

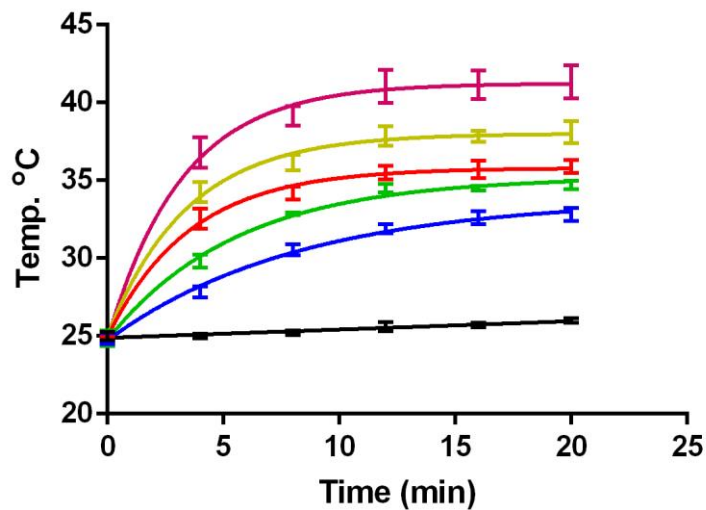

**Figure S28.** Photothermal study of ZnPc(tomamine)<sub>2</sub>. Temperature taken using a digital thermometer of 0 μM (black), 20 μM (blue), 40 μM (green), 60 μM (red), 80 μM (yellow) and 100 μM (purple) 1.5 mL solutions in PBS. Exposed under direct 13 W white fluorescent lamp at 0.92 mW/cm<sup>2</sup>.

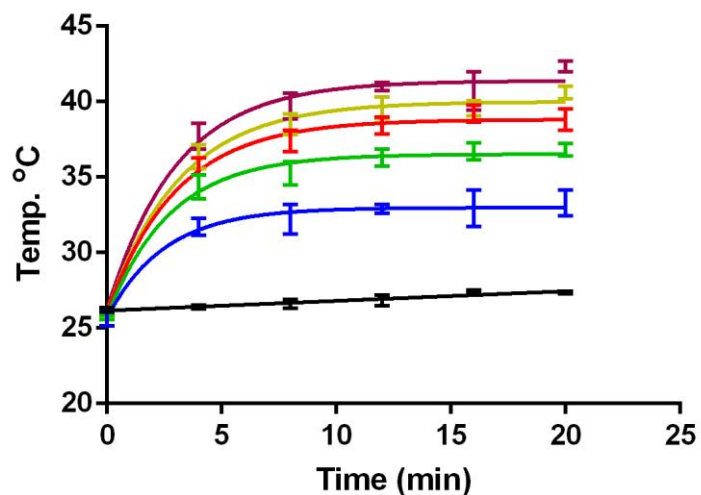

**Figure S29.** Photothermal study of ZnPc(tomamine)<sub>3</sub>. Temperature taken using a digital thermometer of 0 μM (black), 20 μM (blue), 40 μM (green), 60 μM (red), 80 μM (yellow) and 100 μM (purple) 1.5 mL solutions in PBS. Exposed under direct 13 W white fluorescent lamp at 0.92 mW/cm<sup>2</sup>.

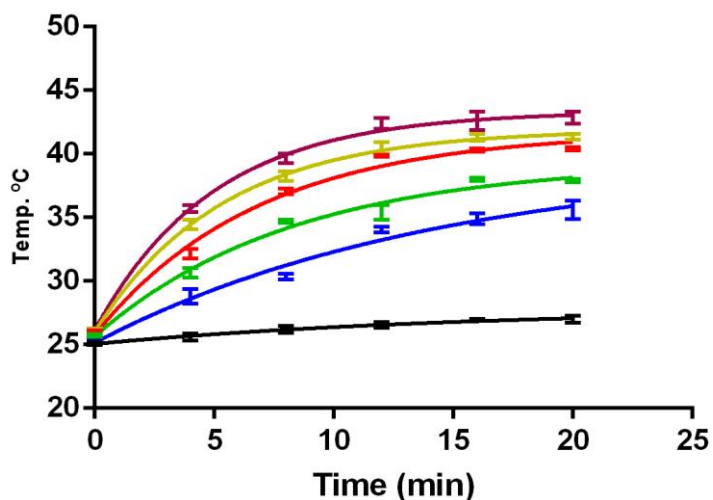

**Figure S30.** Photothermal study of ZnPc(tomamine)<sub>4</sub>. Temperature taken using a digital thermometer of 0 μM (black), 20 μM (blue), 40 μM (green), 60 μM (red), 80 μM (yellow) and 100 μM (purple) 1.5 mL solutions in PBS. Exposed under direct 13 W white fluorescent lamp at 0.92 mW/cm<sup>2</sup>.

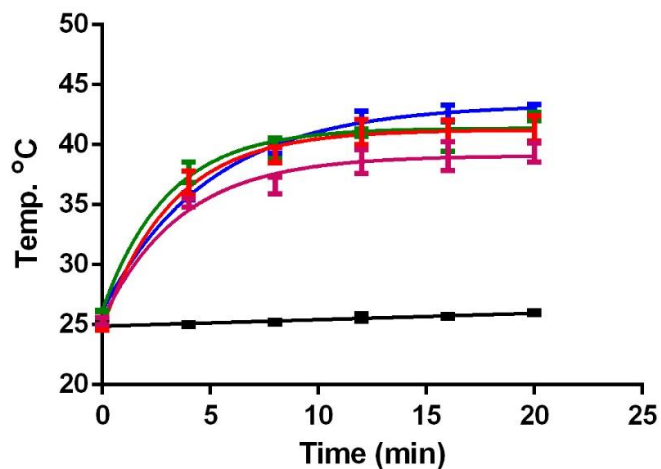

**Figure S31.** Overlay of photothermal studies of ZnPc(tomamine)<sub>1</sub> (pink), ZnPc(tomamine)<sub>2</sub> (red), ZnPc(tomamine)<sub>3</sub> (green) ZnPc(tomamine)<sub>4</sub> (blue) and no compound control (black) 1.5 mL solutions in PBS. Temperature taken every 4 min using a digital thermometer. 100  $\mu$ M solutions were exposed under direct 13 W white fluorescent lamp at 0.92 mW/cm<sup>2</sup>.

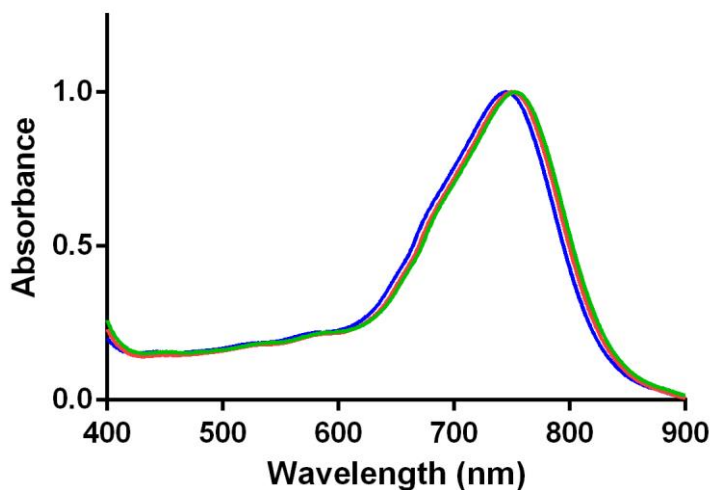

**Figure S32.** Overlay of temperature dependence UV-visible absorbance spectra of ZnPc(tomamine)<sub>1</sub> at 0 °C (blue), 25 °C (red) and 60 °C (green) in THF.

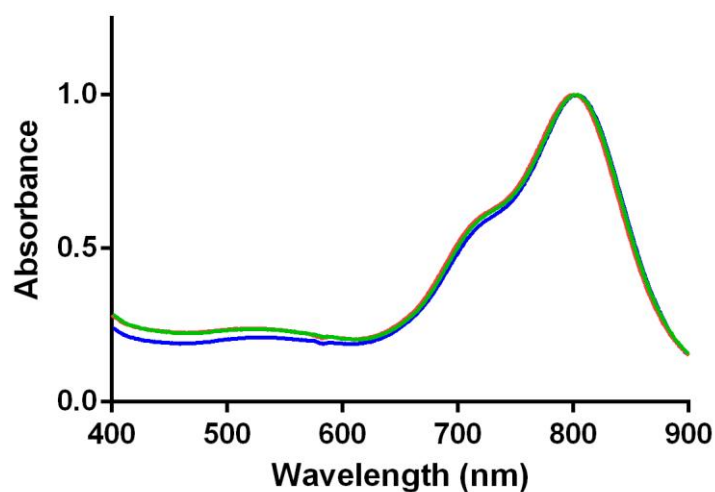

**Figure S33.** Overlay of temperature dependence UV-visible absorbance spectra of ZnPc(tomamine)<sub>4</sub> at 0 °C (blue), 25 °C (red) and 60 °C (green) in THF.

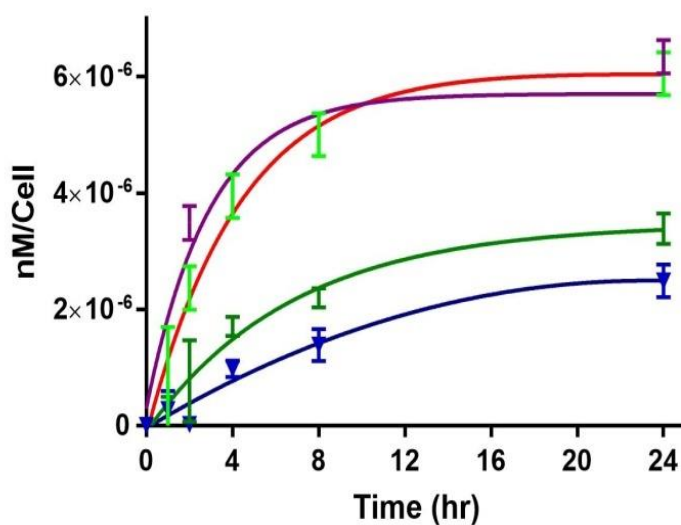

**Figure S34.** Uptake studies of ZnPc(tomamine)<sub>1</sub> (pink), ZnPc(tomamine)<sub>2</sub> (red), ZnPc(tomamine)<sub>3</sub> (green) and ZnPc(tomamine)<sub>4</sub> (blue) using MDA-MD231 breast cancer cells.

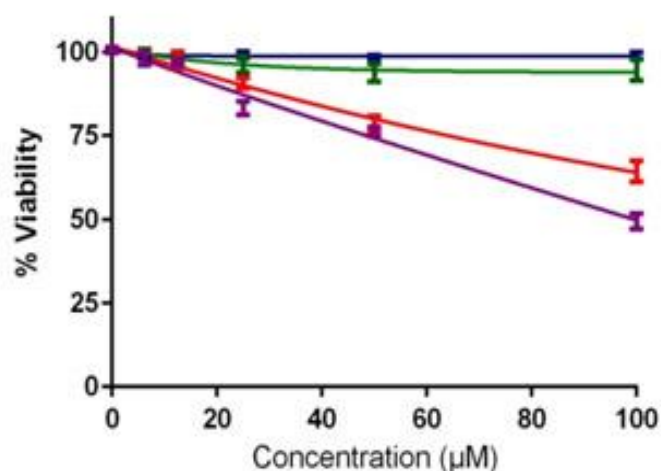

**Figure S35.** Dark toxicity studies of compounds ZnPc(tomamine)<sub>1</sub> (pink), ZnPc(tomamine)<sub>2</sub> (red), ZnPc(tomamine)<sub>3</sub> (green) and ZnPc(tomamine)<sub>4</sub> (blue) using MDA-MD231 breast cancer cells.

| Compound                    | Octanol:PBS | logP <sub>Oct:PBS</sub> |
|-----------------------------|-------------|-------------------------|
| ZnPc(tomamine) <sub>1</sub> | 22:1        | 1.34                    |
| ZnPc(tomamine) <sub>2</sub> | 39:1        | 1.59                    |
| ZnPc(tomamine) <sub>3</sub> | 88:1        | 1.94                    |
| ZnPc(tomamine) <sub>4</sub> | 91:1        | 1.96                    |

**Table S4.** Octanol/PBS partition coefficients.

Octanol-water partition coefficient values were determined for all four compounds using the shake flask method.<sup>[6]</sup> Data show that the log P increase and that solubility in aqueous media decreases with the number of tomamines added to the ZnF<sub>16</sub>Pc. The dynamic light scattering (DLS) indicates these compounds form aggregates in phosphate buffered saline (PBS), where smaller aggregates were observed for mono and di substituted products when compared to tri and tetra substituted compounds (Figure S34-S37).

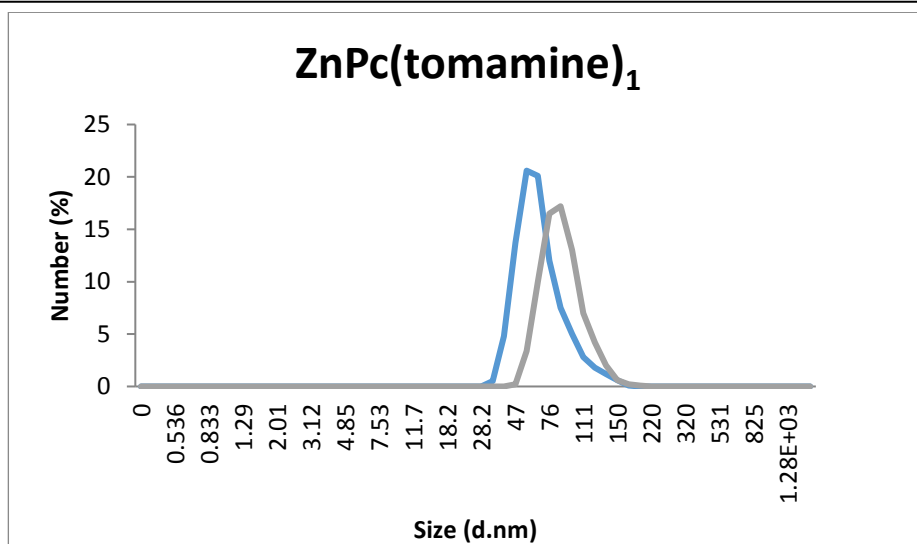

**Figure S36.** DLS of ZnPc(tomamine)<sub>1</sub> in acetone (blue) and PBS buffer (gray).

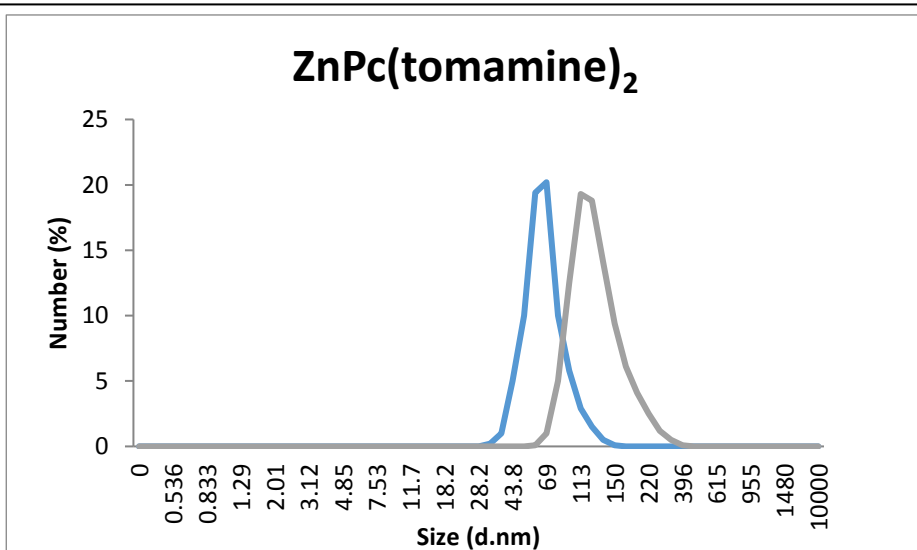

**Figure S37.** DLS of ZnPc(tomamine)<sub>2</sub> in acetone (blue) and PBS buffer (gray).

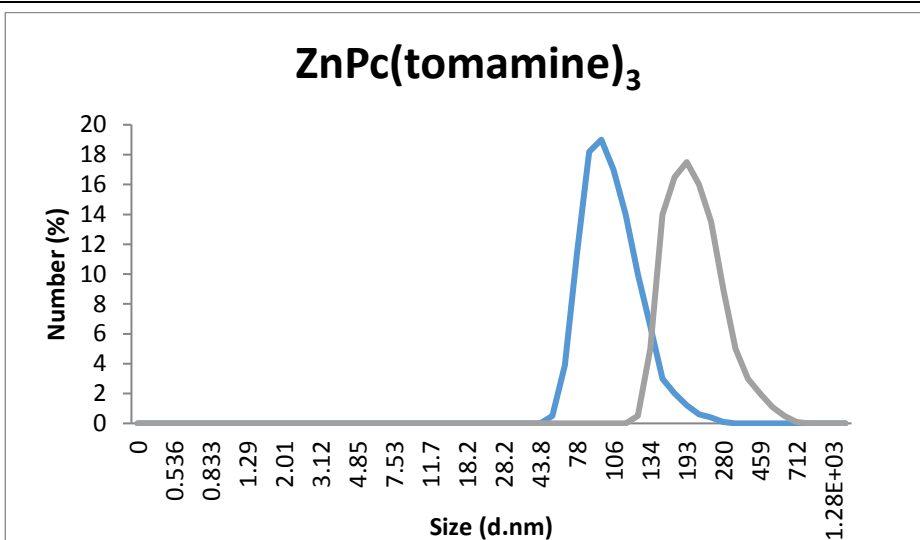

**Figure S38.** DLS of ZnPc(tomamine)<sub>3</sub> in acetone (blue) and PBS buffer (gray).

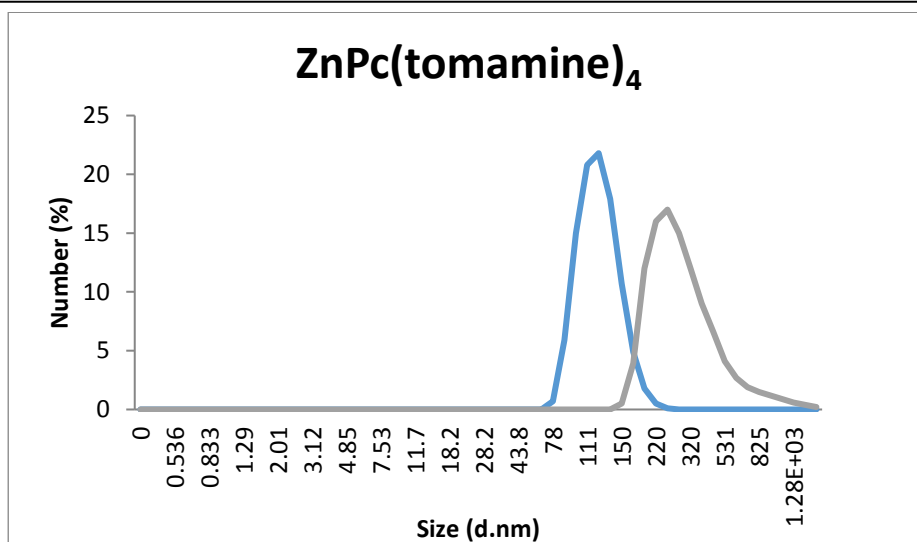

**Figure S39.** DLS of ZnPc(tomamine)<sub>4</sub> in acetone (blue) and PBS buffer (gray).

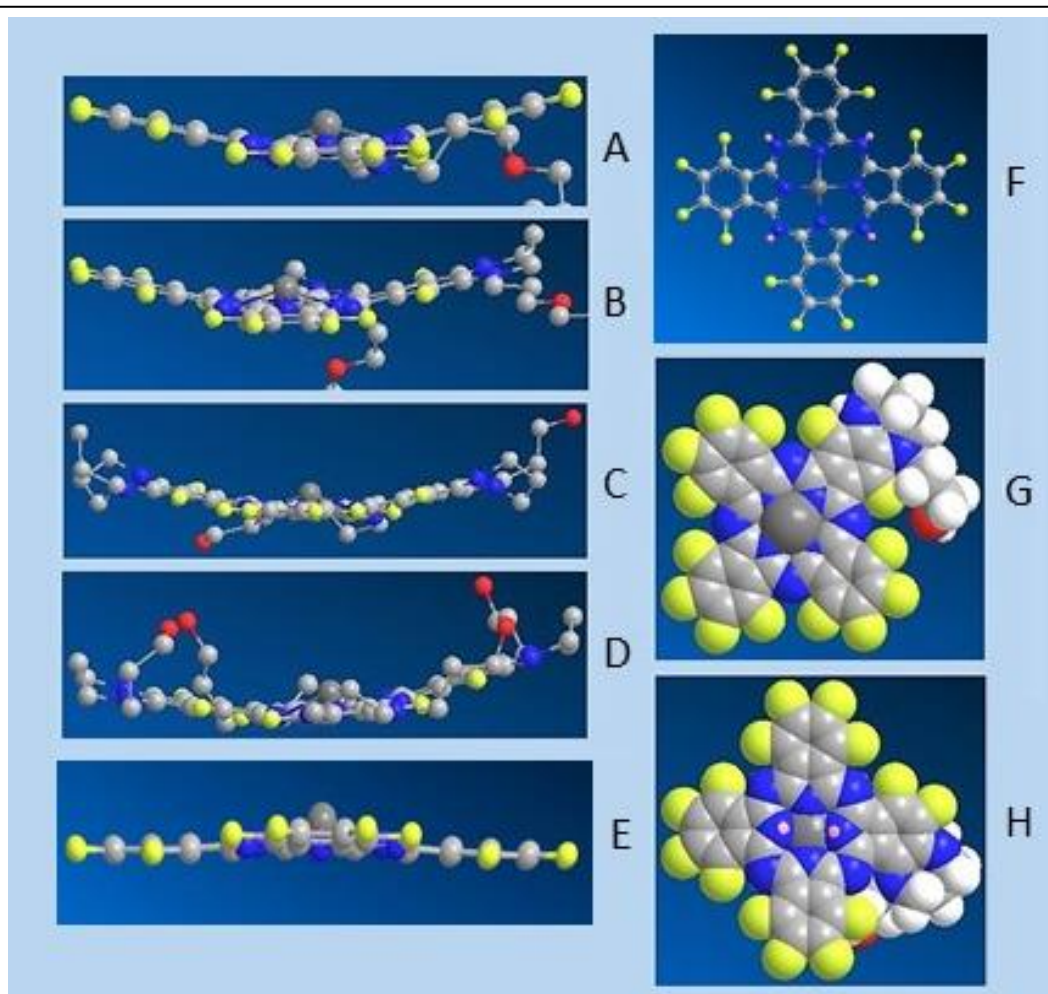

**Figure S40.** The side chains up to the oxygen and hydrogens are removed for clarity to highlight the distorted Pc of these MM2 steric energy minimized structures. (A)  $\text{ZnPc}(\text{tomamine})_1$ , (B)  $\text{ZnPc}(\text{tomamine})_2$ , (C)  $\text{ZnPc}(\text{tomamine})_3$ , (D)  $\text{ZnPc}(\text{tomamine})_4$ , (E)  $\text{ZnF}_{16}\text{Pc}$  side-view, (F)  $\text{ZnF}_{16}\text{Pc}$  top-view. Annealing these several times to 300 K and re-minimizing consistently results in the same distortions. (G) space filling model of  $\text{ZnPc}(\text{tomamine})_1$  appended to adjacent beta positions, (H) space filling model of  $\text{ZnPc}(\text{tomamine})_1$  where the primary amine is appended to a beta position and the secondary to the adjacent alpha position highlights the reason the latter is unreactive.

#### MM2 energy minimization.

The MM2 calculations were run on ChemOffice 3D with a minimum RMS gradient of 0.01, then molecular dynamics with a 2 fs interval were used to anneal the structure to 300 K, and the steric minimization was run again. This process was repeated to assure that the minimal geometry of the macrocycle was consistently nonplanar. Similar procedures of the starting  $\text{ZnF}_{16}\text{Pc}$  always yields a planar structure with the Zn(II) somewhat out of the plane of the isoindoles, consistent with crystal structures of similar complexes.



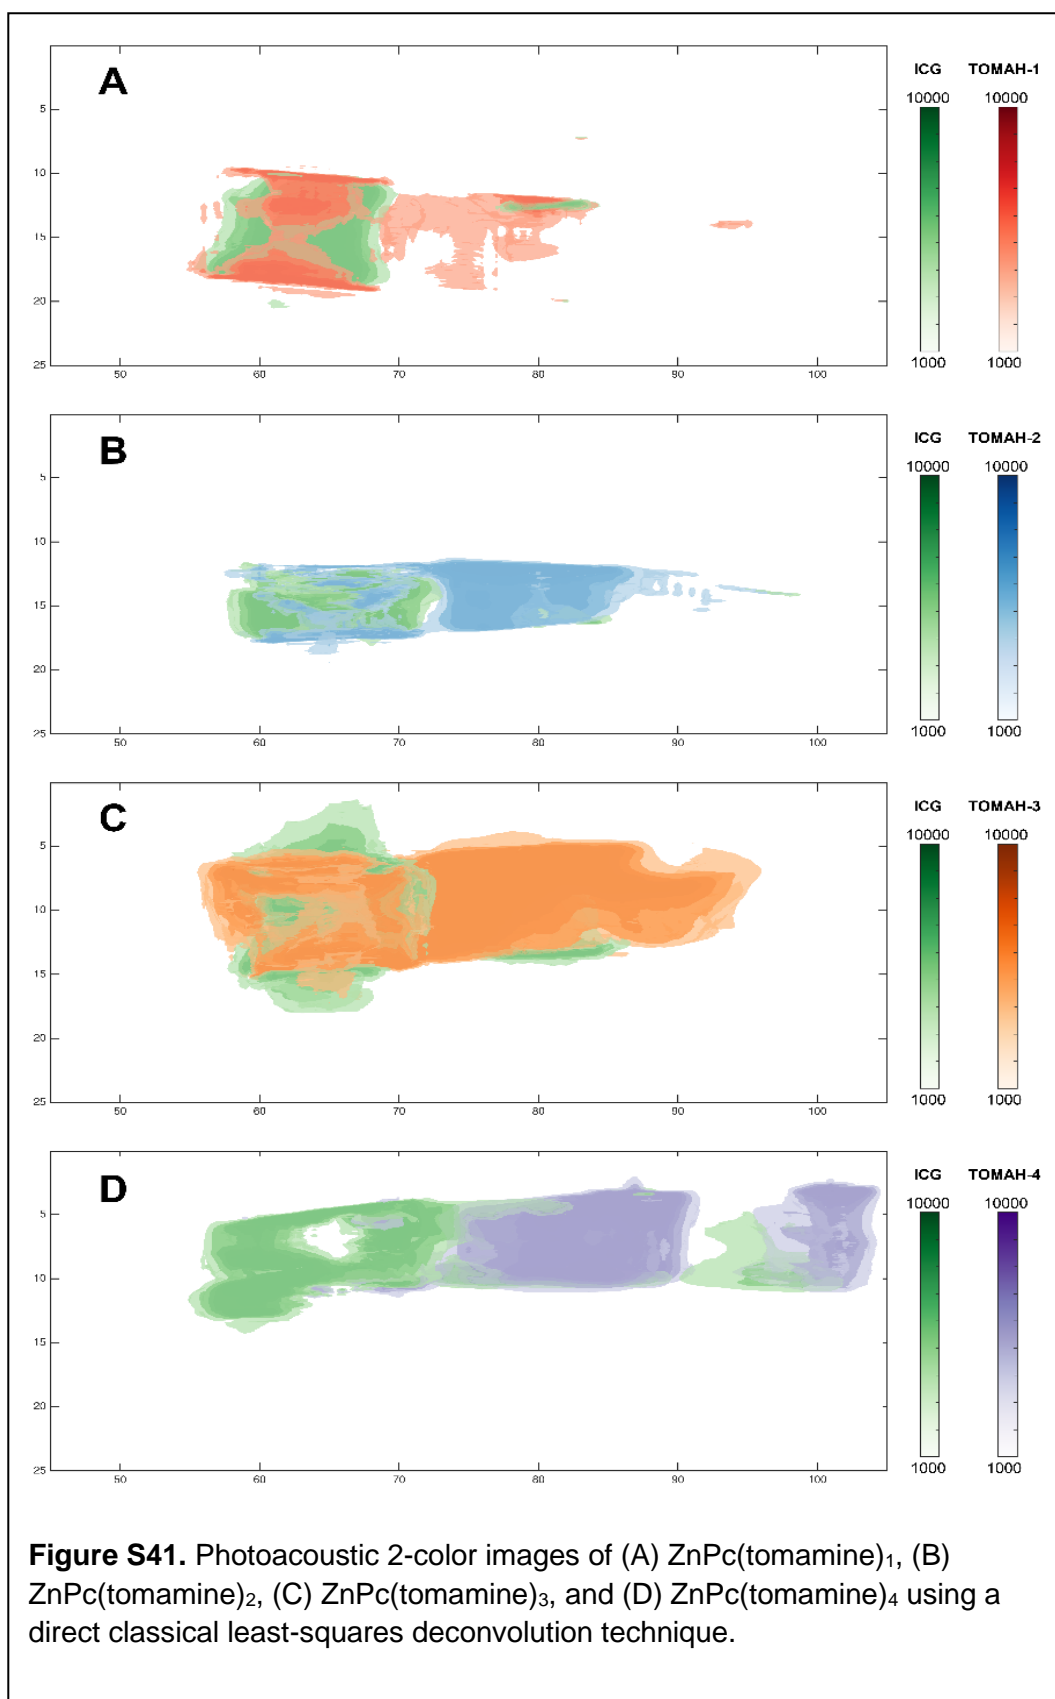

## Platform

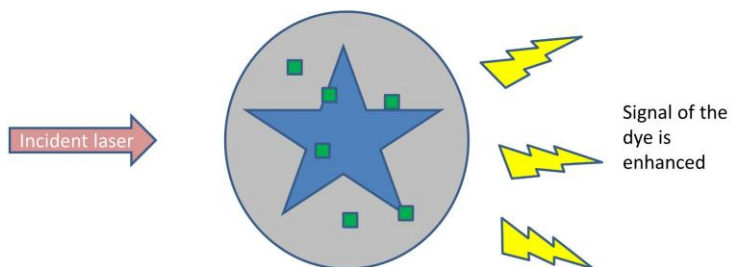

**Figure S42.** Dyes are adsorbed to the surface of gold stars through rapid silication. The electric field at the surface of gold enhances intrinsic Raman scattering. Targeting moieties can be conjugated to the silica to detect particular biomarkers at high sensitivity.

## IR 780

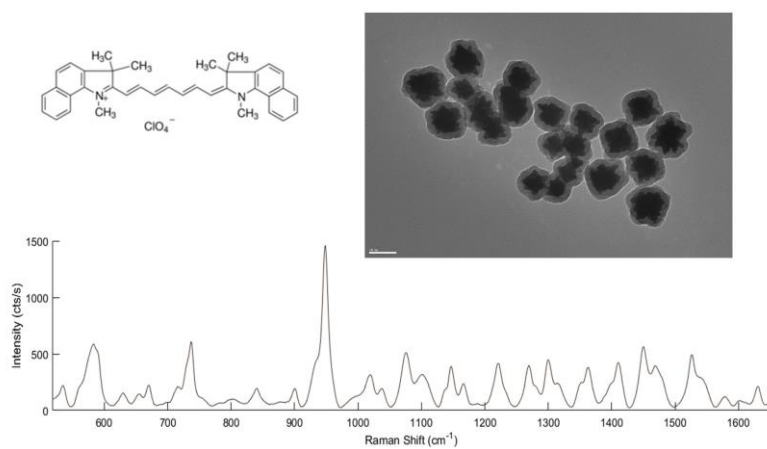

**Figure S43.** SERRS of IR 780 and TEM of the platform with this dye (scale bar = 100 nm).

## M-Tomah

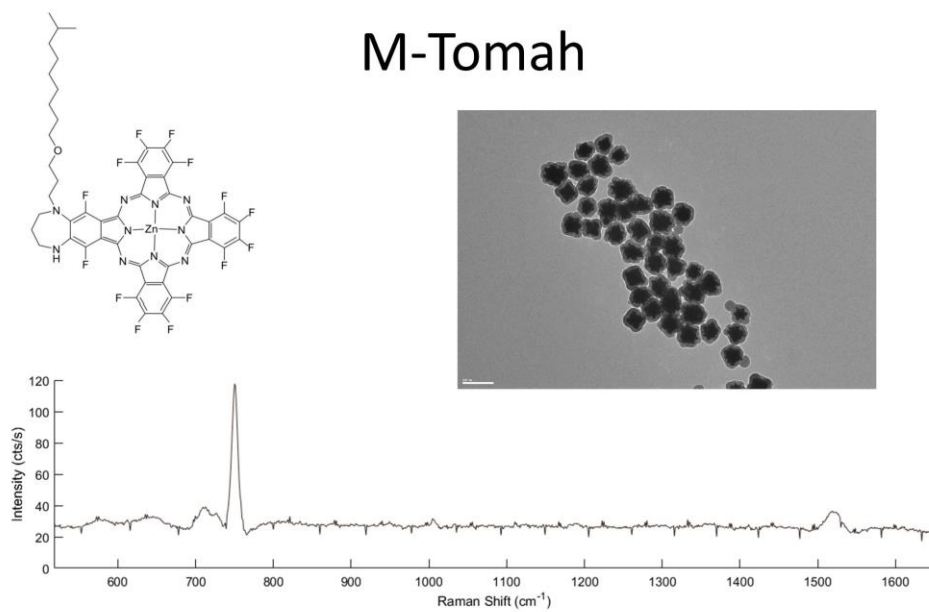

**Figure S44.** SERRS of the ZnPc(tomamine)<sub>1</sub> and TEM of the platform with this dye (scale bar = 200 nm).

## Di-Tomah

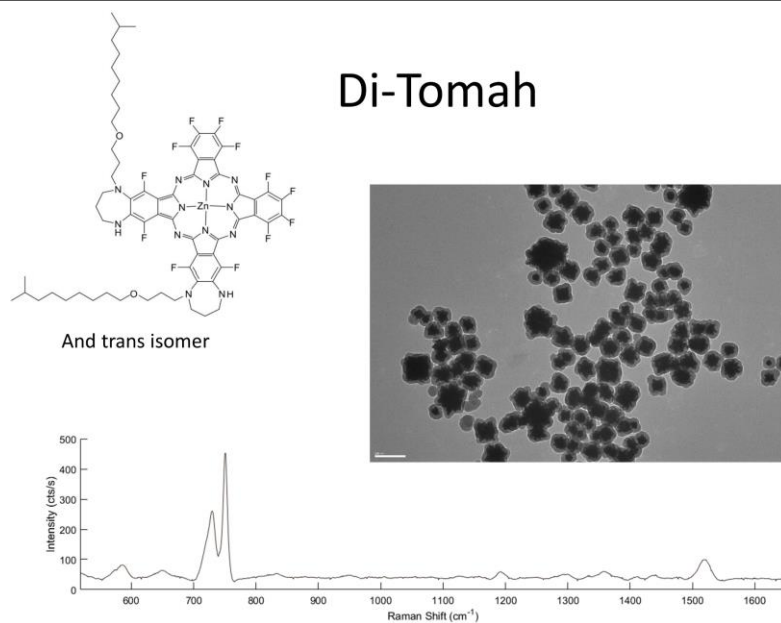

**Figure S45.** SERRS of the ZnPc(tomamine)<sub>2</sub> (mixture of cis and trans isomers) and TEM of the platform with this dye (scale bar = 200 nm).

## Tri-Tomah

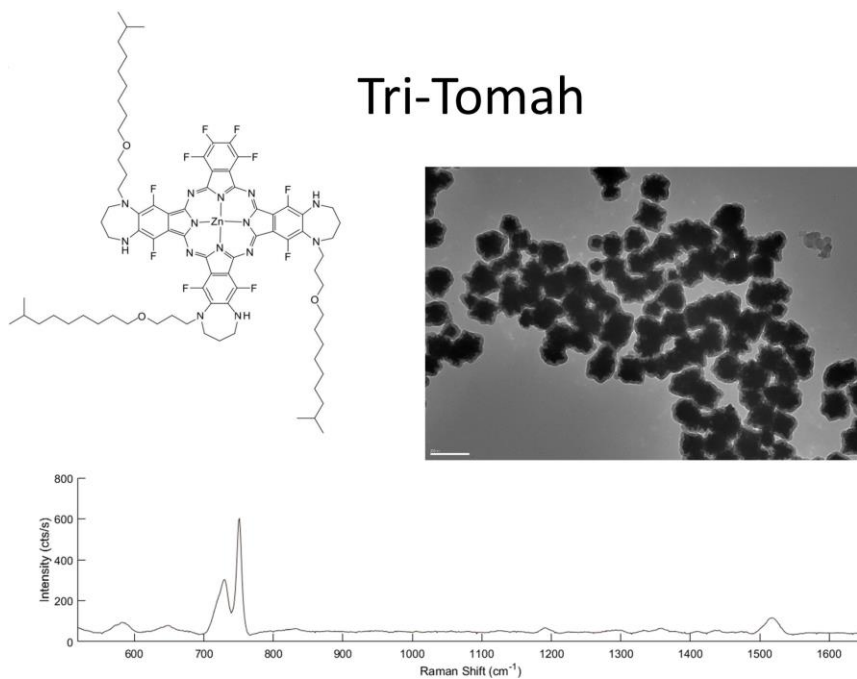

**Figure S46.** SERRS of the ZnPc(tomamine)<sub>3</sub> and TEM of the platform with this dye (scale bar = 200 nm).

## Tetra-Tomah

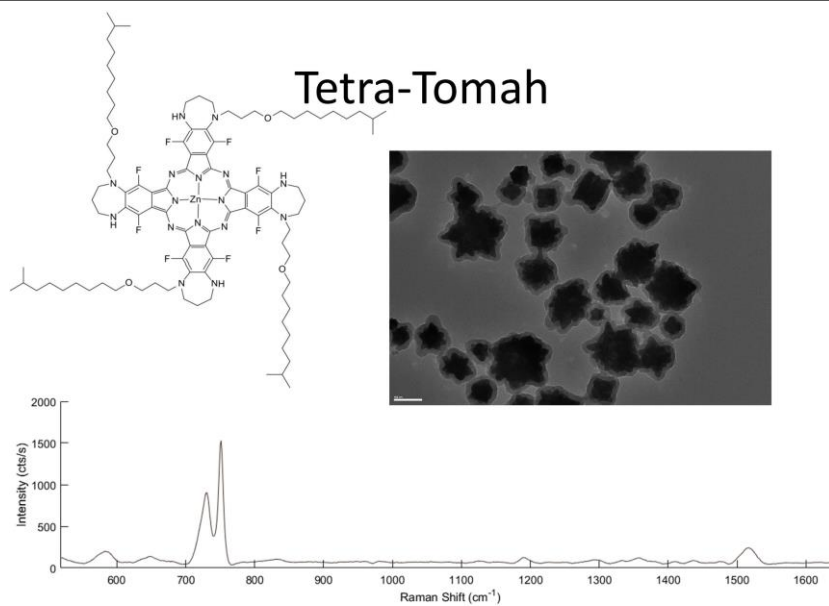

**Figure S47.** SERRS of the ZnPc(tomamine)<sub>4</sub> and TEM of the platform with this dye (scale bar = 200 nm).

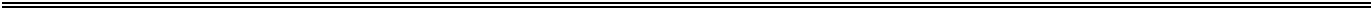

# ZnF16Pc

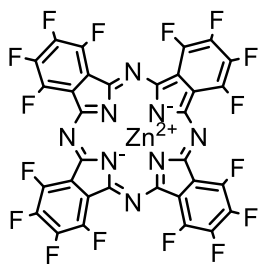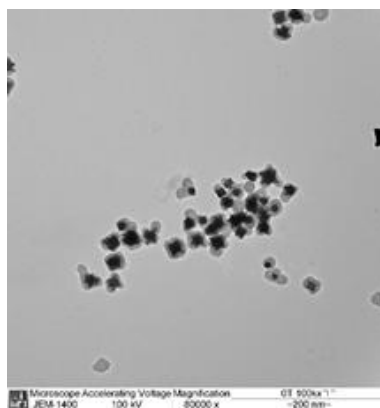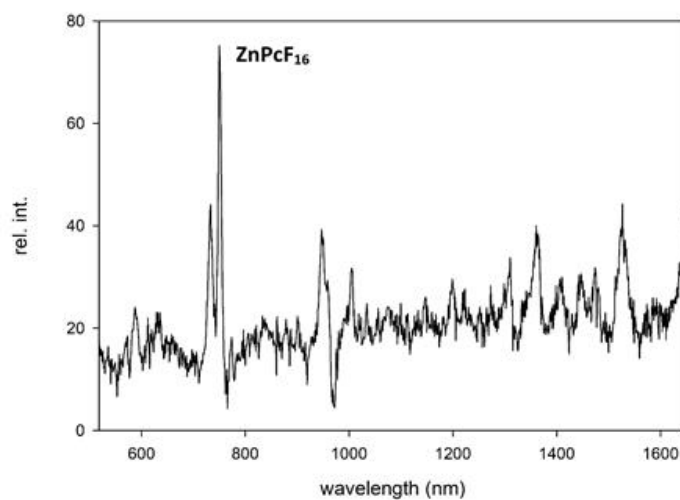

**Figure S48.** SERRS of the starting ZnPcF<sub>16</sub> platform on the gold nanostar nanoparticle and TEM of the platform with this dye (scale bar = 200 nm)

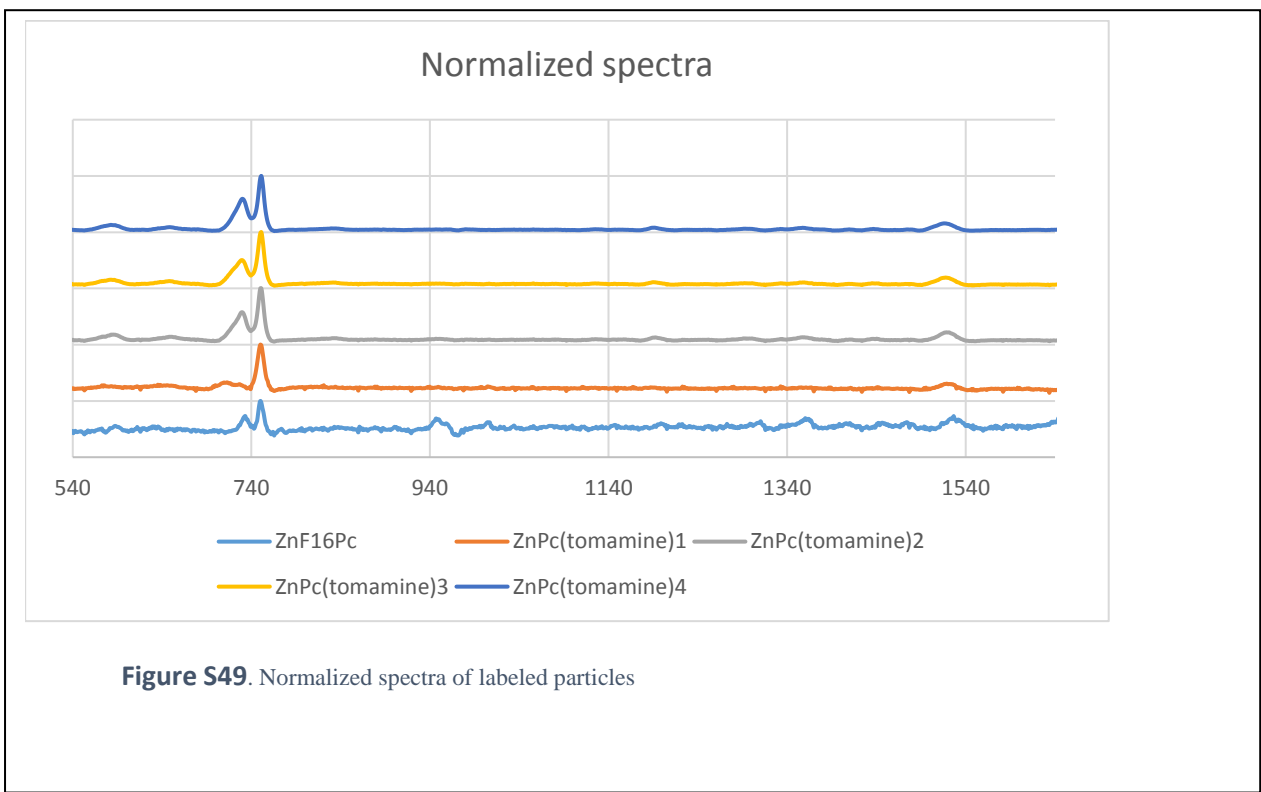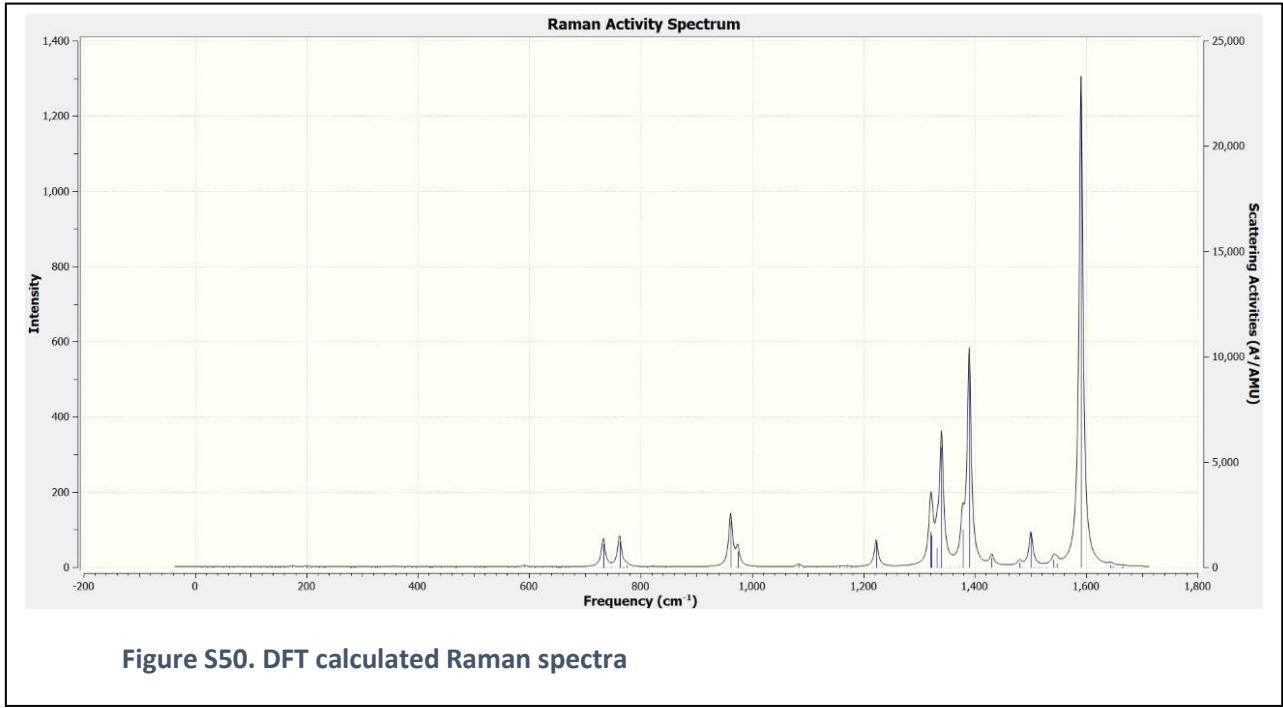

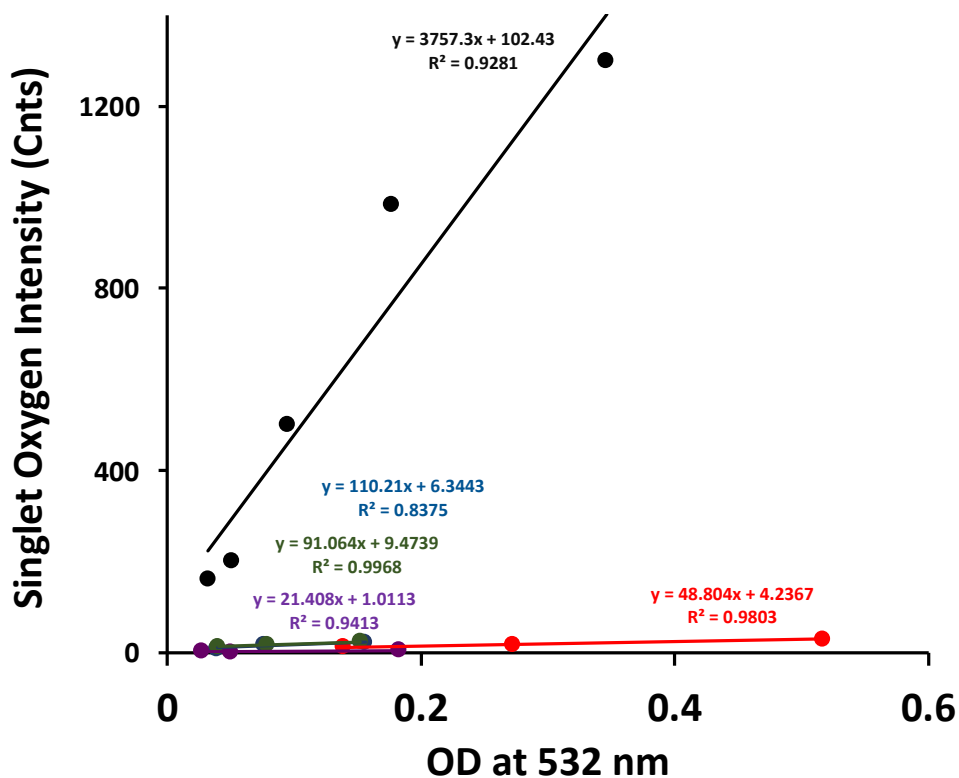

**Figure S51.** Measurements of singlet oxygen intensity at 1270 nm as a function of absorbance upon irradiation of rose bengal (black line),  $\text{ZnPc}(\text{tomamine})_1$  (blue line),  $\text{ZnPc}(\text{tomamine})_2$  (red line),  $\text{ZnPc}(\text{tomamine})_3$  (green line) and  $\text{ZnPc}(\text{tomamine})_4$  (purple line) at 532 nm in d-acetone.



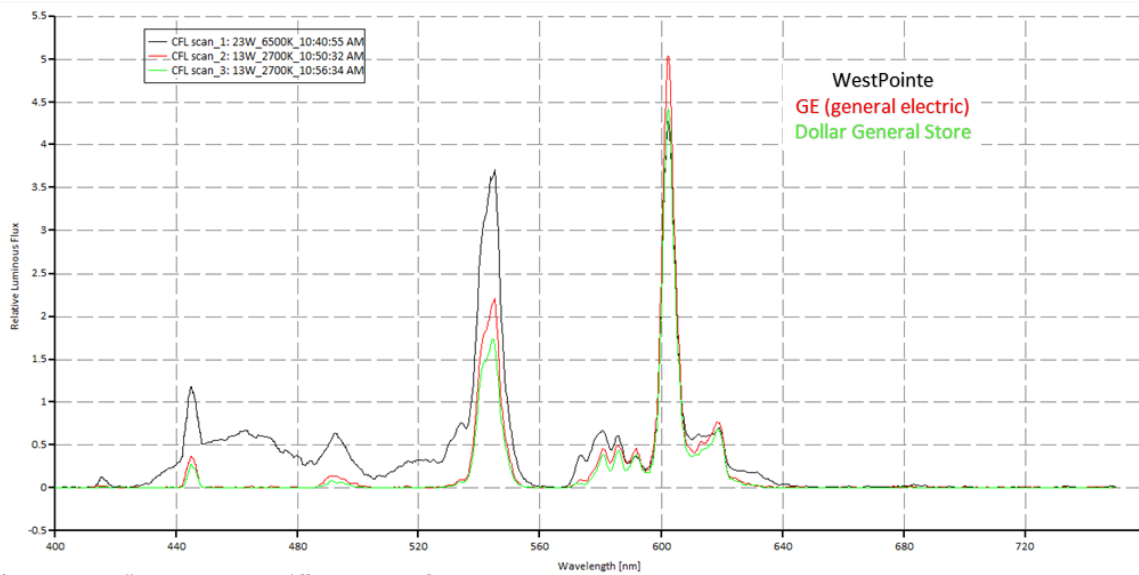

λ 400 - 750nm\_All 3 CFL scans using 3 different CFL manufacturers

Fig.6

**Figure S52.** Spectrum of General Electric Helical 13W, 120V AC, 60 HZ, 190mA, (FLE13HT 2/2/XL.SW) fluorescent bulb taken from: <https://publiclab.org/notes/dhaffnersr/09-06-2016/cfl-and-led-bulb-study-section-iii>

*Watts to lumens calculation*

Energy saving lamps have high luminous efficacy (more lumens per watt).

The luminous flux  $\Phi_v$  in lumens (lm) is equal to the power P in watts (W), times the luminous efficacy  $\eta$  in lumens per watt (lm/W):

$$\Phi_{v(lm)} = P_{(W)} \times \eta_{(lm/W)}$$

## References

- [1] I. M. Smallwood, *Handbook of Organic Solvent Properties*, Arnold, London, UK, **1996**.
- [2] a) J.-P. Strachan, S. Gentemann, J. Seth, W. A. Kalsbeck, J. S. Lindsey, D. Holten, D. F. Bocian, *J. Am. Chem. Soc.* **1997**, *119*, 11191-11201; b) J. Chrysochoos, K. Beyene, *J. Luminesc.* **1999**, *81*, 209-218.
- [3] T. S. Balaban, *Accounts of Chemical Research* **2005**, *38*, 612-623.
- [4] J. P. Celli, B. Q. Spring, I. Rizvi, C. L. Evans, K. S. Samkoe, S. Verma, B. W. Pogue, T. Hasan, *Chemical Reviews* **2010**, *110*, 2795-2838.
- [5] S. Singh, A. Aggarwal, N. V. S. D. K. Bhupathiraju, G. Arianna, K. Tiwari, C. M. Drain, *Chem. Rev.* **2015**, *115*, 10261-10306.
- [6] S. Singh, A. Aggarwal, S. Thompson, J. P. C. Tomé, X. Zhu, D. Samaroo, M. Vinodu, R. Gao, C. M. Drain, *Bioconj. Chem.* **2010**, *21*, 2136-2146.
- [7] V. Neuschmelting, N. C. Burton, H. Lockau, A. Urich, S. Harmsen, V. Ntziachristos, M. F. Kircher, *Photoacoustics* **2016**, *4*, 1-10.
- [8] V. Neuschmelting, H. Lockau, V. Ntziachristos, J. Grimm, M. F. Kircher, *Radiology* **2016**, *280*, 137-150.
- [9] P. Beard, *Interface Focus* **2011**, *1*, 602-631.
- [10] X. M. Qian, S. M. Nie, *Chem. Soc. Rev.* **2008**, *37*, 912-920.
- [11] a) M. Fleischmann, P. J. Hendra, A. J. McQuillan, *Chem. Phys. Lett.* **1974**, *26*, 163-166; b) J. F. Li, Y. F. Huang, Y. Ding, Z. L. Yang, S. B. Li, X. S. Zhou, F. R. Fan, W. Zhang, Z. Y. Zhou, D. Y. Wu, B. Ren, Z. L. Wang, Z. Q. Tian, *Nature* **2010**, *464*, 392.
- [12] a) G. McNay, D. Eustace, W. E. Smith, K. Faulds, D. Graham, *Appl. Spectrosc.* **2011**, *65*, 825-837; b) B. Sharma, R. R. Frontiera, A.-I. Henry, E. Ringe, R. P. Van Duyne, *Mater. Today* **2012**, *15*, 16-25.
- [13] M. A. Wall, S. Harmsen, S. Pal, L. Zhang, G. Arianna, J. R. Lombardi, C. M. Drain, M. F. Kircher, *Adv. Mater.* **2017**, *29*, 1605622.
- [14] a) Z.-Q. Tian, B. Ren, D.-Y. Wu, *J. Phys. Chem. B* **2002**, *106*, 9463-9483; b) S. L. Kleinman, R. R. Frontiera, A.-I. Henry, J. A. Dieringer, R. P. Van Duyne, *Phys. Chem. Chem. Phys.* **2013**, *15*, 21-36.
- [15] E. C. Le Ru, E. Blackie, M. Meyer, P. G. Etchegoin, *J. Phys. Chem. C* **2007**, *111*, 13794-13803.
- [16] W. E. Doering, S. Nie, *Anal. Chem.* **2003**, *75*, 6171-6176.
- [17] C. C. Leznoff, J. L. Sosa-Sanchez, *Chemical Communications* **2004**, 338-339.
- [18] R. V. Belosludov, D. Nevenon, H. M. Rhoda, J. R. Sabin, V. N. Nemykin, *The Journal of Physical Chemistry A* **2019**, *123*, 132-152.
- [19] a) A. Aggarwal, S. Singh, Y. Zhang, M. Anthes, D. Samaroo, R. Gao, C. M. Drain, *Tetrahedron Letters* **2011**, *52*, 5456-5459; b) S. Silva, P. M. R. Pereira, P. Silva, F. A. Almeida Paz, M. A. F. Faustino, J. A. S. Cavaleiro, J. P. C. Tomé, *Chemical Communications* **2012**, *48*, 3608-3610.
- [20] C. Farley, N. V. S. D. K. Bhupathiraju, B. K. John, C. M. Drain, *J. Phys. Chem. A* **2016**, *120*, 7451-7464.
- [21] a) T. Honda, T. Kojima, N. Kobayashi, S. Fukuzumi, *Angew. Chem. Int. Ed.* **2011**, *50*, 2725-2728; b) S. M. Yoon, H. J. Song, I.-C. Hwang, K. S. Kim, H. C. Choi, *Chem. Com.* **2010**, *46*, 231-233.
- [22] C. Farley, A. Aggarwal, S. Singh, A. Dolor, P. To, A. Falber, M. Crossley, C. M. Drain, *Journal of Computational Chemistry* **2018**, *39*, 1129-1142.
- [23] a) H. Jiang, J. Ye, P. Hu, F. Wei, K. Du, N. Wang, T. Ba, S. Feng, C. Kloc, *Scientific Reports* **2014**, *4*, 7573; b) L.-Y. Cui, J. Yang, Q. Fu, B.-Z. Zhao, L. Tian, H.-L. Yu, *J. Mol. Structure* **2007**, *827*, 149-154.
- [24] a) V. Kavelin, O. Fesenko, H. Dubyna, C. Vidal, T. A. Klar, C. Hrelescu, L. Dolgov, *Nanoscale Res. Lett.* **2017**, *12*, 197; b) D. R. Tackley, G. Dent, W. Ewen Smith, *Phys. Chem. Chem. Phys.* **2001**, *3*, 1419-1426; c) D. R. Tackley, G. Dent, W. Ewen Smith, *Physical Chemistry Chemical Physics* **2000**, *2*, 3949-3955.
- [25] E. E. Ferguson, R. L. Hudson, J. R. Nielsen, D. C. Smith, *J. Chem. Phys.* **1953**, *21*, 1464-1469.
- [26] T. J. Russin, E. İ. Altinoğlu, J. H. Adair, P. C. Eklund, *Journal of Physics: Condensed Matter* **2010**, *22*, 334217.
- [27] S. Mathai, T. A. Smith, K. P. Ghiggino, *Photochem. Photobio. Sci.* **2007**, *6*, 995-1002.
- [28] W. Li, W. Lu, Z. Fan, X. Zhu, A. Reed, B. Newton, Y. Zhang, S. Courtney, P. T. Tiyyagura, R. R. Ratcliff, S. Li, E. Butler, H. Yu, P. C. Ray, R. Gao, *J. Mat. Chem.* **2012**, *22*, 12701-12708.
